# Supplementary material
Source: publisher figshare collection journal article supplement (https://acs.figshare.com/ndownloader/files/13613192)
Supplement: Supplementary file 1 [file 13613192]

## Sheet: Table S-5
Table S-5. Summary of semi-tryptic peptides identified in the five biological replicates of MCF-7 versus MCF-10A cell line comparison with double digestion.
'Peptde Sequence' is the assigned amino acid sequence with the amino acid before and after the sequence shown in brackets "[ ]", the minus sign "-" in the bracket indicates no amino acid is before or after the sequence. 'Relative Summed Intensity' is the summed TMT intensity of the peptide in a give biological replicate, divided by the average value from all biological replicates.
Peptide Sequence	Protein Accession	Gene	Relative Summed Intensity
			MCF-7 Biological Replicates					MCF-10A Biological Replicates
			1	2	3	4	5	1	2	3	4	5
[M].gQkDSYVGDEAqSkR.[G]	P60709	ACTB	0.64424	0.827765	0.767539	1.04421	1.26148	0.749097	1.08171	1.21861	1.09436	1.31098
[K].lcYVALDFEQEmATAASSSSLEk.[S]	P60709	ACTB	0.80384	0.883717	0.690424	0.892802	1.00006	0.881342	0.801767	1.35747	1.3174	1.37118
[V].aLDFEqEMATAASSSSLEk.[S]	P60709	ACTB	0.469203	0.455325	0.412188	0.523188	0.741527	0.507814	2.31421	1.78849	1.34749	1.44056
[M].gQkDSYVGDEAQSk.[R]	P60709	ACTB	1.7114	0.83194	0.99273	1.34466	1.15416	0.816671	0.943072	0.765974	0.691292	0.748101
[L].tEAPLNPkANR.[E]	P60709	ACTB	0.51674	0.61783	0.76196	0.727146	1.2452	0.607776	1.79607	1.50821	1.05851	1.16056
[T].eAPLNPkAnR.[E]	P60709	ACTB	0.629583	0.675799	0.810354	0.784168	1.18922	0.613933	1.76437	1.38432	0.952091	1.19616
[K].qEYDESGPSIVHR.[K]	P60709	ACTB	0.633424	0.48815	0.85289	0.799885	1.36513	0.698522	1.55973	1.34352	0.98381	1.27495
[Q].eYDESGPSIVHR.[K]	P60709	ACTB	0.838131	0.770322	0.996952	0.979732	1.40033	0.630653	1.44278	1.11411	0.773392	1.0536
[D].sYVGDEAQSk.[R]	P60709	ACTB	1.78083	0.83617	1.20725	1.29749	1.37844	0.575582	1.05371	0.724746	0.541898	0.603885
[S].kQEYDESGPSIVHR.[K]	P60709	ACTB	0.957962	0.863923	1.14221	0.989029	1.61746	0.652048	1.21825	0.96734	0.718631	0.873148
[E].yDESGPSIVHR.[K]	P60709	ACTB	0.56552	0.504589	0.580784	0.711206	0.90698	0.6703	2.04383	1.62702	1.07406	1.31572
[Q].kDSYVGDEAqSk.[R]	P60709	ACTB	1.55283	0.683983	0.88794	1.08997	0.995406	0.919613	1.23414	0.988164	0.810461	0.837502
[K].dSYVGDEAQSkR.[G]	P60709	ACTB	0.474355	0.327481	0.428885	0.551045	0.616641	0.833487	1.90689	1.87935	1.29981	1.68206
[G].qkDSYVGDEAQSkR.[G]	P60709	ACTB	0.362909	0.383091	0.411992	0.551647	0.713436	0.863141	1.887	1.80504	1.39967	1.62208
[D].sYVGDEAqSkR.[G]	P60709	ACTB	0.852796	0.86262	1.06951	1.09359	1.53715	0.590679	1.29373	1.05083	0.754734	0.894356
[SC].yVGDEAQSkR.[G]	P60709	ACTB	0.441338	0.507737	0.540138	0.627451	0.861236	0.673374	2.12686	1.72467	1.09755	1.39965
[Q].kDSYVGDEAQSkR.[G]	P60709	ACTB	0.731711	0.756788	0.866279	1.01511	1.31802	0.869588	1.09983	1.13829	1.08649	1.11789
[K].aGFAGDDAPR.[A]	P60709	ACTB	0.863807	0.859672	0.833786	1.09819	1.37856	0.598297	1.37289	1.13844	0.828258	1.0281
[LV].ekSYELPDGQVITIGNER.[F]	P60709	ACTB	0.492217	0.450003	0.524069	0.578753	0.877637	0.602899	2.21898	1.69655	1.15051	1.40838
[Y].eLPDGqVITIGNER.[F]	P60709	ACTB	0.716447	0.582913	0.677394	0.871361	1.01576	0.705777	1.77504	1.39359	1.01831	1.24342
[L].vVDnGSGMckAGFAGDDAPR.[A]	P60709	ACTB	0.430655	0.45038	0.514456	0.649506	0.900689	0.581675	2.27119	1.76163	1.06826	1.37156
[L].aPSTMkIkIIAPPER.[K]	P60709	ACTB	0.380412	0.447409	0.561647	0.504977	0.987637	0.580039	2.03797	1.8379	1.158	1.50401
[K].dLYANTVLSGGTTMYPGIADR.[M]	P60709	ACTB	0.840254	0.712846	0.671974	0.90109	0.948191	0.797537	1.45616	1.25224	1.0683	1.35141
[S].sLEkSYELPDGQVITIGNER.[F]	P60709	ACTB	0.63716	0.630977	0.674689	0.678925	1.11909	0.619543	1.91919	1.51803	1.00337	1.19902
[A].sSSSLEkSYELPDGQVITIGNER.[F]	P60709	ACTB	0.574635	0.610806	0.618849	0.745332	1.08975	0.774953	1.74226	1.59143	1.09632	1.15567
[R].kDLYANTVLSGGTTMYPGIADR.[M]	P60709	ACTB	0.969716	0.695703	0.7755	1.05273	1.13266	0.827304	1.11561	1.18751	0.996195	1.24707
[S].sSLEkSYELPDGQVITIGNER.[F]	P60709	ACTB	0.81574	0.587176	0.780075	0.836095	1.11195	0.74317	1.4634	1.3717	1.05521	1.23547
[ML].ckAGFAGDDAPR.[A]	P60709	ACTB	0.825532	0.982522	1.08098	1.18022	1.73256	0.605121	1.06101	0.939285	0.732167	0.860599
[G].mGqkDSYVGDEAqSkR.[G]	P60709	ACTB	0.47717	0.61995	0.597495	0.766255	0.980999	0.579899	2.05609	1.5869	1.07558	1.25966
[L].vVDnGSGMck.[A]	P60709	ACTB	0.497399	0.600778	0.596042	0.708314	1.05622	0.55086	2.2569	1.58295	0.944512	1.20602
[M].kIkIIAPPER.[K]	P60709	ACTB	0.793306	0.631024	0.934332	0.840646	1.21045	0.756985	1.48542	1.26336	0.93749	1.14699
[K].dSYVGDEAqSk.[R]	P60709	ACTB	0.701494	0.538305	0.589559	0.805999	0.886114	0.823502	1.86109	1.45005	1.06728	1.27661
[K].qEYDESGPSIVH.[R]	P60709	ACTB	0.540039	0.500366	0.488644	0.727754	0.801683	0.671553	2.10314	1.59196	1.15367	1.42119
[Y].dESGPSIVHR.[K]	P60709	ACTB	0.656638	0.643947	0.735958	0.829744	1.15369	0.512755	1.95181	1.38476	0.945424	1.18528
[A].gFAGDDAPR.[A]	P60709	ACTB	0.639225	0.556235	0.835017	0.699949	1.08887	0.571837	2.03347	1.48141	0.891309	1.20267
[K].ikIIAPPER.[K]	P60709	ACTB	0.495348	0.412734	0.486089	0.599732	0.920578	0.579379	2.50431	1.71816	1.04724	1.23643
[R].aVFPSIVGR.[P]	P60709	ACTB	0.426672	0.394632	0.341941	0.550663	0.826224	0.225341	3.55958	1.87068	0.77963	1.02463
[SC].yVGDEAQSk.[R]	P60709	ACTB	0.638493	0.375225	0.456047	0.565919	0.701921	0.743759	2.54106	1.63248	1.07078	1.27432
[Y].vGDEAqSkR.[G]	P60709	ACTB	0.376726	0.376833	0.496545	0.514505	0.95413	0.609413	2.41136	1.81039	1.10466	1.34544
[I].kIIAPPER.[K]	P60709	ACTB	0.260987	0.229901	0.372822	0.374349	0.746489	0.517376	3.28387	1.82855	1.03695	1.34872
[E].aPLNPkAnR.[E]	P60709	ACTB	1.00954	0.55456	0.680757	0.867283	0.974797	0.573715	1.79563	1.37419	0.935489	1.23404
[G].fAGDDAPR.[A]	P60709	ACTB	0.899789	0.790726	0.814679	1.01951	1.35491	0.583487	1.46144	1.18706	0.87582	1.01257
[S].yELPDGQVITIGNER.[F]	P60709	ACTB	0.810147	0.567972	0.692099	0.937694	0.920065	0.784831	1.54118	1.38723	1.05476	1.30403
[L].tEAPLNPk.[AI]	P60709	ACTB	0.753884	0.614054	0.708009	0.799706	1.05218	0.635446	2.06984	1.35255	0.938464	1.07586
[Y].vGDEAqSk.[R]	P60709	ACTB	0.753662	0.418591	0.534205	0.732369	0.806309	0.693712	2.50826	1.5291	0.937389	1.0864
[T].mYPGIADR.[M]	P60709	ACTB	1.08246	0.881081	1.05992	1.01472	1.47661	0.528152	1.27789	1.05778	0.733063	0.88833
[CV].kAGFAGDDAPR.[A]	P60709	ACTB	0.934564	0.947924	1.00919	1.05414	1.47089	0.680582	1.27162	1.0003	0.776428	0.854372
[R].vAPEEHPVLLT.[E]	P60709	ACTB	0.440796	0.510319	0.433376	0.588267	0.640887	0.811725	2.08241	1.82757	1.21646	1.44819
[R].vAPEEHPVLL.[T]	P60709	ACTB	0.519025	0.50962	0.564959	0.769444	0.894881	0.788419	1.95111	1.55986	1.0922	1.35048
[R].vAPEEHPVL.[L]	P60709	ACTB	0.45053	0.370341	0.434928	0.535256	0.77806	0.580717	2.65417	1.72356	1.08875	1.38369
[RQ].aVFPSIVGRPR.[QH]	P60709	ACTB	0.823019	0.595661	0.665058	1.08134	1.04337	0.781315	1.63496	1.33173	0.925861	1.11769
[M].vGmGQkDSYVGDEAqSkR.[G]	P60709	ACTB	0.492655	0.521055	0.572003	0.736264	0.973199	0.612325	1.79337	1.67864	1.18804	1.43245
[Q].vITIGNER.[F]	P60709	ACTB	0.758319	0.566176	0.663855	0.791045	1.01817	0.842365	1.83388	1.35962	0.997082	1.16949
[IV].dNGSGMckAGFAGDDAPR.[A]	P60709	ACTB	0.685865	0.719449	0.69816	0.831516	1.08331	0.678306	1.40575	1.39768	1.10065	1.39932
[L].vIDnGSGMckAGFAGDDAPR.[A]	P63261	ACTG1	0.393371	0.348856	0.426764	0.56996	0.848872	0.514798	2.47928	1.83124	1.11674	1.47012
[L].vIDnGSGMck.[A]	P63261	ACTG1	0.479707	0.491001	0.550856	0.64303	0.914041	0.608009	2.49074	1.54796	0.9917	1.28295
[L].yAnnVLSGGTTMYPGIADR.[M]	P62736	ACTA2	0.422888	0.923189	0.628731	1.13865	0.84995	0.615219	1.75269	1.44619	0.919667	1.30283
[R].kPLVIIAEDVDGEALSTLVLNR.[L]	P10809	HSPD1	0.878892	0.895814	0.809353	1.00224	1.03035	0.956846	1.05683	1.21852	1.06431	1.08684
[L].kVGGTSDVEVNEkkDR.[V]	P10809	HSPD1	0.183749	0.319475	0.287111	0.326997	0.846553	0.335161	2.55342	2.22192	1.12678	1.79883
[K].dMAIATGGAVFGEEGLTLNLEDVQPHDLGk.[V]	P10809	HSPD1	0.765676	0.78372	0.545562	0.728267	0.764699	0.577957	1.33608	1.65445	1.30735	1.53624
[R].aAVEEGIVLGGGcALLR.[C]	P10809	HSPD1	0.610008	0.594606	0.547106	0.823115	1.02036	0.767367	1.41292	1.51608	1.267	1.44143
[T].tSEYEkEkLNER.[L]	P10809	HSPD1	0.765628	0.605313	0.693076	0.882785	1.17255	0.792779	1.52183	1.31608	1.06829	1.18167
[K].vGGTSDVEVNEkkDR.[V]	P10809	HSPD1	0.552054	0.45942	0.524213	0.705437	0.963092	0.570236	1.97324	1.68495	1.11214	1.45522
[T].sDVEVNEkkDR.[V]	P10809	HSPD1	0.462138	0.54914	0.501042	0.644538	0.964561	0.695749	1.98181	1.68346	1.07145	1.44612
[V].aVTMGPkGR.[T]	P10809	HSPD1	0.84774	0.826046	0.77423	1.04911	1.22336	0.774634	1.35595	1.17706	0.883077	1.0888
[Q].sIVPALEIANAHR.[K]	P10809	HSPD1	0.953561	0.572763	0.868004	0.898313	1.00016	0.936782	1.36792	1.22736	1.04638	1.12876
[M].vEkGIIDPTkVVR.[T]	P10809	HSPD1	0.622647	0.502703	0.478309	0.735755	0.939578	0.866637	1.6183	1.56651	1.22532	1.44424
[A].eDVDGEALSTLVLNR.[L]	P10809	HSPD1	0.675836	0.599974	0.627729	0.941934	1.11537	0.832982	1.64294	1.37815	0.899756	1.28534
[L].nLEDVQPHDLGkVGEVIVTk.[D]	P10809	HSPD1	0.794338	0.706317	0.675667	0.889805	1.26453	0.875487	1.52711	1.2999	0.901245	1.06561
[W].gSPkVTkDGVTVAk.[S]	P10809	HSPD1	0.326783	0.243335	0.286053	0.455986	0.601354	0.697129	2.17601	1.964	1.37364	1.87571
[T].kDDAMLLkGk.[G]	P10809	HSPD1	0.751647	0.787348	0.815463	0.942623	1.19058	0.98731	1.28927	1.21191	0.986289	1.03755
[V].ekGIIDPTkVVR.[T]	P10809	HSPD1	0.427035	0.337718	0.346235	0.504364	0.629573	0.779918	2.04033	1.88289	1.29727	1.75468
[E].kGIIDPTkVVR.[T]	P10809	HSPD1	0.52856	0.345268	0.488927	0.642426	0.765241	0.843736	2.02425	1.64123	1.21605	1.50431
[Q].vVAVkAPGFGDNR.[K]	P10809	HSPD1	0.854346	0.6996	0.692057	1.01171	1.10329	0.945165	1.1833	1.22768	1.03328	1.24957
[K].gIIDPTkVVR.[T]	P10809	HSPD1	0.683362	0.492666	0.507438	0.791965	0.86066	0.733056	1.868	1.56518	1.08097	1.41671
[Q].sWGSPkVTkDGVTVAk.[S]	P10809	HSPD1	0.552971	0.680867	0.638335	0.831572	1.17659	0.881897	1.42293	1.43129	1.123	1.26056
[E].gFEkISkGANPVEIR.[R]	P10809	HSPD1	1.19762	0.616945	0.669492	1.0737	0.994778	0.970025	1.17195	1.10724	1.01833	1.17992
[K].lVqDVANNTNEEAGDGTTT.[A]	P10809	HSPD1	0.62892	0.619968	0.628463	0.825175	0.983677	0.724628	1.83355	1.4519	0.993799	1.30992
[T].kDGVTVAk.[S]	P10809	HSPD1	1.19536	0.610727	0.707575	0.976249	1.01117	0.999309	1.27056	1.15275	0.971294	1.10501
[S].dVEVNEkkDR.[V]	P10809	HSPD1	0.350084	0.534564	0.501895	0.684477	1.09629	0.743422	1.8128	1.59579	1.20306	1.47762
[R].sIAkEGFEkISk.[G]	P10809	HSPD1	0.482867	0.321067	0.354717	0.499013	0.611133	0.452571	3.12616	1.90945	1.01677	1.22625
[S].eYEkEkLNER.[L]	P10809	HSPD1	0.671284	0.529272	0.511439	0.74761	0.997352	0.83787	1.65056	1.48898	1.17681	1.38882
[K].nAGVEGSLIVEk.[I]	P10809	HSPD1	0.755471	0.632766	0.609031	0.917071	1.13257	0.743115	1.47221	1.35146	1.06316	1.32315
[Y].akDVkFGADAR.[A]	P10809	HSPD1	0.99647	1.22535	1.07599	1.32963	1.63691	0.773142	0.882459	0.746412	0.682899	0.650737
[A].vkAPGFGDNR.[K]	P10809	HSPD1	0.964318	0.638927	0.637908	0.980514	1.04592	0.833347	1.35992	1.26882	1.01718	1.25314
[A].lDSLTPANEDQkIGIEIIkR.[T]	P10809	HSPD1	1.88136	0.777934	0.487928	1.36909	0.827384	0.682958	1.16901	0.998413	0.882918	0.923008
[A].nEDQkIGIEIIkR.[T]	P10809	HSPD1	1.11335	0.553042	0.680125	1.02358	0.937912	0.89277	1.40764	1.22493	1.01487	1.15178
[T].kDDAMLLk.[G]	P10809	HSPD1	1.5952	0.792528	0.978555	1.22657	1.16643	0.885929	0.997448	0.853355	0.729705	0.774276
[R].kGVITVkDGkTL.[N]	P10809	HSPD1	0.435496	0.400103	0.430998	0.562182	0.771573	0.458604	2.54054	1.97135	1.02294	1.40621
[K].gVITVkDGkTL.[N]	P10809	HSPD1	0.467877	0.453501	0.461436	0.653153	0.763914	0.633079	2.31827	1.68299	1.12162	1.44416
[K].gDkAQIEkR.[I]	P10809	HSPD1	0.820709	0.575427	0.572459	0.92862	0.951817	0.893457	1.55018	1.3348	1.06653	1.306
[V].kAPGFGDNR.[K]	P10809	HSPD1	0.927948	0.662719	0.654757	0.9565	1.09677	0.762535	1.60449	1.26715	0.915514	1.15162
[K].sIDLkDkYkNIGAk.[L]	P10809	HSPD1	0.683176	0.525957	0.528506	0.724455	0.854108	0.925108	1.51201	1.52094	1.24359	1.48215
[D].sLTPANEDQkIGIEIIkR.[T]	P10809	HSPD1	0.82806	0.736679	0.663914	0.89708	0.901611	1.13773	1.30036	1.29164	1.03279	1.21013
[K].dVkFGADAR.[A]	P10809	HSPD1	0.365413	0.317068	0.331616	0.49038	0.609409	0.826027	2.24186	1.90494	1.16577	1.74752
[K].aPGFGDNR.[K]	P10809	HSPD1	0.459839	0.341808	0.373679	0.544038	0.579114	0.778074	2.36276	1.80974	1.17253	1.57842
[V].aVkAPGFGDNR.[K]	P10809	HSPD1	0.586966	0.649836	0.629153	0.661515	0.841154	1.12246	1.58761	1.53059	1.13576	1.25496
[K].gkGDkAqIEkR.[I]	P10809	HSPD1	0.610585	0.553637	0.6083	0.809927	1.03198	0.73123	1.92332	1.40678	1.0352	1.28904
[L].sDGVAVLk.[V]	P10809	HSPD1	0.743994	0.568562	0.556507	0.883287	1.0157	0.878392	1.54665	1.42723	1.07833	1.30135
[R].aAVEEGIVL.[G]	P10809	HSPD1	0.781501	0.67085	0.750388	0.989756	1.11487	0.742826	1.61908	1.23669	0.972731	1.1213
[A].kDVkFGADAR.[A]	P10809	HSPD1	0.414614	0.425347	0.436801	0.641033	0.86545	1.06117	1.89383	1.55869	1.25148	1.45158
[K].vGGTSDVEVN.[E]	P10809	HSPD1	0.746535	0.558247	0.688079	0.865419	0.921396	0.683177	1.78222	1.4304	1.03077	1.29376
[K].gANPVEIR.[R]	P10809	HSPD1	0.653847	0.503003	0.495258	0.815724	0.905686	0.543309	2.13995	1.64942	0.969626	1.32418
[K].sIDLkDkYkNIGA.[K]	P10809	HSPD1	0.243912	0.196952	0.195912	0.291943	0.416018	0.63069	2.77263	2.16414	1.38551	1.7023
[K].lVqDVAnnT.[N]	P10809	HSPD1	0.820394	0.64288	0.710929	1.05984	1.12217	0.715065	1.52003	1.24826	0.915321	1.24511
[K].kqSkPVTTPEEIAqVA.[T]	P10809	HSPD1	0.62287	0.508994	0.689684	0.795197	0.902769	0.836455	1.79652	1.38828	1.03916	1.42008
[K].sNQnGkDSkPSSTPR.[S]	P06748	NPM1	0.328111	0.363736	0.390565	0.447972	0.693743	0.523998	3.03341	1.86057	1.13293	1.22497
[S].nQnGkDSkPSSTPR.[S]	P06748	NPM1	0.800849	0.520397	0.51788	0.830039	0.671224	1.36162	1.24933	1.30632	1.4254	1.31695
[A].qkSNQnGkDSkPSSTPR.[S]	P06748	NPM1	0.706958	0.616835	1.00949	0.957888	1.36033	0.774692	1.32903	1.12378	1.01714	1.10385
[R].sAPGGGSkVPqk.[K]	P06748	NPM1	0.41695	0.393364	0.497532	0.509481	0.889317	0.346266	3.51321	1.57178	0.855911	1.00619
[R].sAPGGGSkVPqkk.[V]	P06748	NPM1	0.460333	0.343845	0.547073	0.527292	0.96888	0.424223	3.13059	1.63666	0.896581	1.06453
[R].sAPGGGSkVPQkkVk.[L]	P06748	NPM1	0.326017	0.26702	0.335237	0.411311	0.522085	0.423719	3.11981	1.98567	1.24044	1.3687
[K].tPkGPSSVEDIkAk.[M]	P06748	NPM1	0.516521	0.333088	0.365195	0.498215	0.643528	0.414746	2.90242	1.91184	1.19061	1.22384
[K].tPkTPkGPSSVEDIkAk.[M]	P06748	NPM1	0.554333	0.405506	0.454801	0.598752	0.733088	0.475875	2.27021	1.85246	1.31582	1.33916
[K].tPkTPkGPSSVEDIk.[A]	P06748	NPM1	0.298565	0.273496	0.356418	0.443676	0.574593	0.508183	3.11752	1.94122	1.11446	1.37187
[K].lAADEDDDDDDEEDDDEDDDDDDFDDEEAEEkAPVk.[K]	P06748	NPM1	0.361643	0.435685	0.739447	0.670068	1.06511	0.313722	2.77713	1.57704	1.00428	1.05588
[A].sIEkGGSLPkVEAk.[F]	P06748	NPM1	0.881335	0.442596	0.435814	0.711354	0.55952	1.02804	1.70366	1.54562	1.27193	1.42013
[K].tPkGPSSVEDIkA.[K]	P06748	NPM1	0.491896	0.429038	0.407032	0.600262	0.737702	0.579561	2.74857	1.69005	1.07007	1.24583
[S].iEkGGSLPkVEAk.[F]	P06748	NPM1	1.45613	0.685258	0.694325	1.18592	0.740495	1.10667	1.13219	0.983422	1.04649	0.969103
[Q].aSIEkGGSLPkVEAk.[F]	P06748	NPM1	1.5659	0.814287	0.797411	1.33161	0.937735	0.88817	1.00331	0.924961	0.853953	0.882656
[L].aADEDDDDDDEEDDDEDDDDDDFDDEEAEEkAPVk.[K]	P06748	NPM1	0.605187	0.889876	1.81017	1.14886	2.08466	0.30414	1.22923	0.858592	0.436056	0.633233
[K].gPSSVEDIkAk.[M]	P06748	NPM1	0.399789	0.345793	0.308924	0.438926	0.595803	0.551167	3.11953	1.81353	1.11074	1.31581
[A].aDEDDDDDDEEDDDEDDDDDDFDDEEAEEkAPVk.[K]	P06748	NPM1	0.274507	0.425869	0.747022	0.6501	0.74997	0.633704	2.16815	1.58667	1.25021	1.51381
[R].sAPGGGSkVPqkkV.[K]	P06748	NPM1	0.234629	0.213592	0.231634	0.291585	0.443972	0.358668	4.01685	1.94849	1.05559	1.20499
[R].sAPGGGSkVPQ.[K]	P06748	NPM1	0.864091	0.549659	0.658494	0.957399	0.989017	0.563113	2.11766	1.31031	0.931436	1.05882
[K].lAADEDDDDDDEEDDDEDDDDDDFDDEEAEEkAP.[V]	P06748	NPM1	0.112646	0.304611	0.24712	0.301547	0.385074	0.503102	3.4097	2.03916	1.25369	1.44336
[K].gPSSVEDIk.[A]	P06748	NPM1	0.460203	0.376121	0.461426	0.548224	0.694014	0.458038	3.14883	1.71038	0.935456	1.20731
[Q].ekTPkTPkGPSSVEDIk.[A]	P06748	NPM1	0.506593	0.358732	0.518781	0.546258	0.721101	1.189	1.6255	1.53962	1.47686	1.51756
[S].aPGGGSkVPqkk.[V]	P06748	NPM1	0.443322	0.308029	0.454554	0.507492	0.770339	0.497427	2.94368	1.80797	0.951375	1.31582
[S].aPGGGSkVPQk.[K]	P06748	NPM1	0.232872	0.255788	0.272217	0.311261	0.500616	0.401357	3.49728	2.04426	1.07642	1.40793
[N].qnGkDSkPSSTPR.[S]	P06748	NPM1	0.387466	0.401444	0.437142	0.470485	0.768326	0.579906	2.80817	1.78295	1.12223	1.24188
[E].aEEkAPVkkSIR.[D]	P06748	NPM1	0.364773	0.473118	0.61069	0.732049	0.914395	0.776922	1.71765	1.49501	1.36906	1.54633
[R].sAPGGGSkVP.[Q]	P06748	NPM1	0.619051	0.501517	0.67891	0.662309	1.02089	0.535097	2.54596	1.53229	0.838993	1.06499
[M].nYEGSPIk.[V]	P06748	NPM1	0.436954	0.383747	0.486789	0.601039	0.760169	0.670653	2.27262	1.70557	1.22398	1.45848
[R].sAPGGGSk.[V]	P06748	NPM1	0.777829	1.0928	1.0683	1.02034	1.98448	0.432068	1.44739	0.888115	0.635985	0.652686
[K].gPSSVEDIkA.[K]	P06748	NPM1	0.45344	0.402675	0.406724	0.565001	0.651428	0.45062	3.20572	1.71828	0.945476	1.20064
[N].gkDSkPSSTPR.[S]	P06748	NPM1	0.43823	0.598133	0.593741	0.628618	1.12447	0.566737	2.27185	1.50269	1.01686	1.25868
[Q].nGkDSkPSSTPR.[S]	P06748	NPM1	0.287733	0.289398	0.326492	0.373149	0.614217	0.672271	2.79336	1.8994	1.29992	1.44406
[K].vDNDENEHQLSL.[R]	P06748	NPM1	0.660395	0.542848	0.608836	0.804472	0.826938	0.908951	1.55652	1.39438	1.24709	1.44956
[RH].aDHGEPIGR.[G]	P08238	HSP90AB1	0.869942	0.711771	0.706833	1.00659	1.2886	0.821632	1.31013	1.18433	0.956902	1.14326
[K].hNDDEQYAWESSAGGSFTVR.[TA]	P07900-2	HSP90AA1	0.807192	0.726143	0.608999	0.749537	1.01327	0.891968	1.53508	1.41873	1.01863	1.23046
[K].eDQTEYLEER.[RW]	P07900-2	HSP90AA1	0.509718	0.408714	0.367364	0.577736	0.822082	0.928726	1.99285	1.63041	1.24345	1.51896
[L].kEDQTEYLEER.[RW]	P07900-2	HSP90AA1	0.592373	0.511739	0.488689	0.691145	1.02787	0.930808	1.73288	1.44686	1.17502	1.40261
[A].aEEPnAAVPDEIPPLEGDEDASR.[M]	P08238	HSP90AB1	1.25345	0.735719	0.671536	1.2193	1.06202	0.724167	1.32308	1.06819	0.877857	1.06469
[L].dSGkELkIDIIPNPQER.[T]	P08238	HSP90AB1	0.537172	0.438195	0.421456	0.700926	1.10345	0.819343	1.74847	1.71182	1.10389	1.41528
[K].sLTNDWEDHLAVk.[H]	P07900-2	HSP90AA1	0.9088	0.781366	0.729722	0.969122	1.15529	0.720736	1.31346	1.22314	1.03335	1.16501
[A].eEPnAAVPDEIPPLEGDEDASR.[M]	P08238	HSP90AB1	0.932448	0.720837	0.785131	1.11439	1.19486	0.676696	1.45237	1.14405	0.869479	1.10974
[RH].gVVDSEDLPLNISR.[E]	P07900-2	HSP90AA1	0.443437	0.381851	0.381521	0.575281	0.831764	0.692567	2.18404	1.77195	1.22971	1.50788
[N].aAVPDEIPPLEGDEDASR.[M]	P08238	HSP90AB1	0.590164	0.642573	0.641199	0.798629	1.0492	0.597612	1.9504	1.42195	1.05601	1.25226
[K].vILHLkEDQTEYLEER.[RW]	P07900-2	HSP90AA1	0.827611	0.78929	0.820293	0.990411	1.1453	0.732562	1.26167	1.20733	0.999243	1.22629
[L].gLGIDEDEVAAEEPNAAVPDEIPPLEGDEDASR.[M]	P08238	HSP90AB1	0.783157	0.779423	0.894795	1.05003	1.47047	0.604172	1.08809	1.22501	1.04816	1.0567
[L].tDPSkLDSGkELkIDIIPNPQER.[T]	P08238	HSP90AB1	0.534774	0.469194	0.494908	0.471478	1.02499	0.829241	1.91678	1.52824	1.36872	1.36167
[L].gIDEDEVAAEEPnAAVPDEIPPLEGDEDASR.[M]	P08238	HSP90AB1	0.667378	0.584687	0.603472	0.912586	0.869867	0.831679	1.47055	1.40064	1.18983	1.46931
[L].kIDIIPNPqER.[T]	P08238	HSP90AB1	1.19765	0.9802	0.832185	1.1659	1.44563	0.980414	1.03977	0.772045	0.776055	0.810143
[H].lkEDQTEYLEER.[RW]	P07900-2	HSP90AA1	0.625238	0.475344	0.482508	0.670877	1.00412	0.916757	1.72636	1.48035	1.16324	1.45521
[S].nASDALDkIR.[LY]	P14625	HSP90B1	0.762003	0.537911	0.389478	0.6566	0.939704	0.961755	1.66725	1.53657	1.21681	1.33192
[L].tNDWEDHLAVk.[H]	P07900-2	HSP90AA1	0.960139	0.86406	0.781102	0.836984	1.16901	0.996917	1.2617	1.14466	0.974968	1.01046
[N].aSDALDkIR.[LY]	P14625	HSP90B1	1.22707	0.796764	0.652072	0.988976	1.47158	0.793749	1.18566	1.00932	0.859185	1.01563
[IL].vDTGIGMTk.[A]	P07900-2	HSP90AA1	0.810548	0.5768	0.638507	0.835947	1.13718	0.698645	1.58499	1.41267	1.02394	1.28077
[RHQ].tLTLVDTGIGMTk.[A]	P08238	HSP90AB1	0.921961	0.848831	0.66425	1.15489	1.2663	0.69008	1.22705	1.07979	1.00785	1.139
[K].yIDqEELNkTkPIWTR.[N]	P07900-2	HSP90AA1	0.997051	0.608147	0.616583	0.820521	1.01252	0.782276	1.54107	1.35037	1.01129	1.26017
[A].vPDEIPPLEGDEDASR.[M]	P08238	HSP90AB1	0.775848	0.610499	0.659021	0.819226	1.07683	0.758713	1.72774	1.34113	0.996001	1.23499
[L].hLkEDqTEYLEER.[RW]	P07900-2	HSP90AA1	0.696608	0.561618	0.529309	0.752962	0.943439	0.831183	1.74705	1.45109	1.12065	1.36608
[L].gIHEDSTNR.[R]	P08238	HSP90AB1	0.808208	0.749616	0.803283	1.05414	1.19721	0.650734	1.51935	1.20056	0.808032	1.20886
[F].sVEGqLEFR.[A]	P07900-2	HSP90AA1	0.721745	0.573016	0.59744	0.861404	1.04105	0.834007	1.5981	1.37065	1.08752	1.31507
[R].gVVDSEDLPLnIS.[R]	P07900-2	HSP90AA1	0.771681	0.584572	0.612356	0.91099	1.028	0.925321	1.45984	1.31777	1.10296	1.28651
[K].hLEINPDHPIVETL.[R]	P08238	HSP90AB1	1.1178	0.736653	0.822966	1.08618	1.04335	0.854152	1.21261	1.12793	0.969922	1.02844
[R].gVVDSEDLPLN.[IL]	P07900-2	HSP90AA1	0.809194	0.643887	0.694134	1.09929	1.03358	0.733054	1.43773	1.25258	0.971548	1.325
[K].iDIIPNPqER.[T]	P08238	HSP90AB1	0.591117	0.51793	0.487178	0.751455	0.89856	0.825747	1.83092	1.54483	1.1762	1.37607
[I].dIIPNPqER.[T]	P08238	HSP90AB1	0.820758	0.749634	0.768084	0.990205	1.22683	0.668671	1.54834	1.21606	0.912537	1.09889
[L].gTIAkSGTk.[A]	P07900-2	HSP90AA1	0.493315	0.481509	0.4388	0.644926	1.08962	0.72584	2.06073	1.58124	1.11312	1.37089
[T].nDWEDHLAVk.[H]	P07900-2	HSP90AA1	0.582998	0.405486	0.435109	0.602468	0.61284	0.850936	1.81949	1.73264	1.33481	1.62322
[SA].sDALDkIR.[YL]	P07900-2	HSP90AA1	0.895644	0.599321	0.531124	0.84829	1.14217	0.816443	1.58926	1.31065	1.06983	1.19727
[Q].ekNTLPTkETIEQEkR.[S]	P63313	TMSB10	0.749316	0.378927	0.46651	0.701343	0.671524	1.36368	1.30942	1.35872	1.45547	1.54509
[T].eTQEkNTLPTkETIEQEkR.[S]	P63313	TMSB10	0.728755	0.297609	0.363899	0.623695	0.516839	1.86063	0.976031	1.31	1.65061	1.67193
[E].tqEkNTLPTkETIEqEkR.[S]	P63313	TMSB10	0.916254	0.622934	0.794294	1.00056	1.39712	0.72609	1.35372	1.14318	0.987189	1.05867
[N].tLPTkETIEQEkR.[S]	P63313	TMSB10	0.951097	0.770224	0.838227	1.08145	1.50284	0.68753	1.33012	1.0588	0.843231	0.936474
[K].tETqEkNTLPTkETIEqEkR.[S]	P63313	TMSB10	0.448039	0.359365	0.437613	0.562315	0.686839	0.911025	1.99115	1.71254	1.41236	1.47876
[N].tLPTkETIEqEk.[R]	P63313	TMSB10	0.273602	0.296581	0.323734	0.381909	0.59739	0.680887	2.90355	1.83924	1.2621	1.441
[T].lPTkETIEQEk.[R]	P63313	TMSB10	0.430251	0.440454	0.338864	0.56147	0.560941	0.834925	2.1137	1.8558	1.37607	1.48753
[K].nTLPTkETIEqEk.[R]	P63313	TMSB10	0.263773	0.244907	0.264723	0.359766	0.39523	1.02086	2.36425	1.84816	1.56911	1.66923
[T].lPTkETIEqEkR.[S]	P63313	TMSB10	1.07635	0.89302	0.851992	1.29176	1.46084	0.572434	1.16868	0.975297	0.757921	0.951709
[K].tETQEkNTLPTkETIEQEk.[R]	P63313	TMSB10	0.222529	0.159509	0.162441	0.243437	0.319561	0.697928	3.21263	2.0862	1.44828	1.44749
[T].eTqEkNTLPTkETIEQEk.[R]	P63313	TMSB10	0.281857	0.18548	0.203565	0.319765	0.336774	1.54252	1.69742	1.76429	1.84422	1.82411
[K].nTLPTkETIEQEkR.[S]	P63313	TMSB10	0.910127	0.75131	0.699733	1.07271	1.08075	0.87862	1.30687	1.1513	1.00574	1.14283
[E].tqEkNTLPTkETIEqEk.[R]	P63313	TMSB10	0.471517	0.369154	0.397357	0.548589	0.689396	0.81237	2.41787	1.69392	1.27664	1.32318
[Q].ekNTLPTkETIEqEk.[R]	P63313	TMSB10	0.51631	0.416931	0.432765	0.600832	0.669835	1.11783	1.89011	1.4782	1.43645	1.44073
[A].sFDkAkLk.[K]	P63313	TMSB10	2.58021	0.407669	0.642509	1.08322	0.731208	0.941664	1.19943	0.982198	0.730806	0.701082
[T].kETIEqEkR.[S]	P63313	TMSB10	0.655203	0.573969	0.636988	0.852565	0.959529	0.691911	1.72645	1.4185	1.1531	1.33178
[K].kTETqEkNTLPTkETIEQEk.[R]	P63313	TMSB10	0.389915	0.265151	0.351717	0.524794	0.590175	0.951532	2.29357	1.71106	1.41145	1.51064
[R].rFDEILEASDGIMVAR.[G]	P14618	PKM	0.737652	0.63501	0.63675	0.859477	0.920323	0.689953	1.7585	1.38823	1.09326	1.28084
[K].fGVEQDVDMVFASFIR.[K]	P14618	PKM	1.07688	1.11869	0.952687	1.26339	1.2317	0.994925	0.736047	0.830693	0.819655	0.975337
[R].aEGSDVANAVLDGADcIMLSGETAk.[G]	P14618	PKM	0.720092	0.941146	0.733048	1.03492	1.09497	0.977664	1.09661	1.16365	1.04742	1.19049
[R].eAEAAIYHLQLFEELR.[R]	P14618	PKM	1.00002	0.94495	0.872808	0.882404	1.28971	0.914567	1.0535	1.04647	1.01683	0.978741
[R].fDEILEASDGImVAR.[G]	P14618	PKM	0.861205	0.886451	0.712825	1.13734	1.18996	0.721325	1.3954	1.04096	0.933605	1.12092
[R].lAPITSDPTEATAVGAVEASFk.[C]	P14618	PKM	1.00318	0.858421	0.716501	1.0423	1.16482	0.850284	0.746572	1.1607	1.22745	1.22978
[R].gDLGIEIPAEk.[V]	P14618	PKM	0.342798	0.274507	0.445364	0.407323	0.64867	0.689257	2.84203	1.75943	1.15782	1.4328
[R].lDIDSPPITAR.[N]	P14618	PKM	0.492486	0.44291	0.434986	0.619315	0.732299	0.662999	2.65319	1.62552	1.06736	1.26894
[R].eAEAAIYHLqLFEELRR.[L]	P14618	PKM	0.828568	0.835044	0.882722	1.08394	1.2157	0.833932	1.16063	1.09499	0.927845	1.13664
[K].gADFLVTEVEnGGSLGSk.[K]	P14618	PKM	0.883761	0.736342	0.569928	1.01385	0.979038	0.743553	1.27216	1.40018	1.02133	1.37986
[L].dIDSPPITAR.[N]	P14618	PKM	0.350846	0.510184	0.880227	0.485578	1.12415	0.992412	1.8068	1.42248	1.10472	1.32261
[L].sGETAkGDYPLEAVR.[M]	P14618	PKM	0.278748	0.534081	1.13408	0.423447	1.62404	0.768896	1.65924	1.35978	1.04451	1.17319
[C].sGAIIVLTkSGR.[S]	P14618	PKM	0.677781	0.442462	0.629681	0.850313	0.912407	0.709984	2.04137	1.40834	1.02303	1.30464
[S].gETAkGDYPLEAVR.[M]	P14618	PKM	0.164534	0.303089	0.593764	0.284406	0.970668	0.727062	2.18495	1.82966	1.29655	1.64531
[C].kVVEVGSk.[I]	P14618	PKM	0.902192	0.73488	1.11535	0.902009	1.21236	0.985726	1.40246	0.9797	0.831106	0.934224
[G].eTAkGDYPLEAVR.[M]	P14618	PKM	0.550373	0.485086	0.565352	0.633725	0.904218	0.912421	1.74204	1.52323	1.2767	1.40685
[S].kIENHEGVR.[R]	P14618	PKM	0.59904	0.494251	0.680351	0.700271	0.921225	0.805161	2.08746	1.39099	1.03339	1.28786
[E].tAkGDYPLEAVR.[M]	P14618	PKM	0.718488	0.691892	0.82461	0.879846	1.24077	0.929296	1.38208	1.19561	1.07494	1.06247
[T].gIIcTIGPASR.[S]	P14618	PKM	0.522344	0.466646	0.530145	0.662015	0.801661	0.658839	2.30561	1.59351	1.05214	1.4071
[A].mADTFLEHMcR.[L]	P14618	PKM	0.865338	0.692059	0.662533	1.11498	1.02284	0.772207	1.44804	1.25302	0.977967	1.19102
[D].lGIEIPAEk.[V]	P14618	PKM	0.605145	0.455288	0.444698	0.637693	0.828915	0.67894	2.25974	1.66205	1.10139	1.32614
[S].gTAEVELk.[K]	P14618	PKM	0.479736	0.466902	0.783813	0.536505	0.780546	1.09673	2.00507	1.46657	1.09218	1.29194
[D].iDSPPITAR.[N]	P14618	PKM	0.449632	0.411108	0.492293	0.588643	0.824166	0.644797	2.73007	1.59437	0.973169	1.29175
[R].aPIIAVTR.[N]	P14618	PKM	0.566122	0.391413	0.483658	0.687049	0.743464	0.668192	2.61679	1.55541	1.03437	1.25353
[L].gIEIPAEk.[V]	P14618	PKM	0.590428	0.50079	0.618348	0.810437	0.887064	0.65915	2.17081	1.48555	1.02183	1.25559
[R].lDIDSPPITA.[R]	P14618	PKM	0.723244	0.595272	0.560594	0.839391	0.914657	0.798283	1.64146	1.34119	1.18428	1.40163
[R].kASDVHEVR.[K]	P14618	PKM	0.324151	0.384947	0.5082	0.757572	0.875148	0.674407	2.25228	1.37943	0.977334	1.86653
[R].lAPITSDPTEAT.[A]	P14618	PKM	0.634084	0.56247	0.694899	0.868394	1.08716	0.702898	1.89645	1.31654	0.994019	1.24308
[K].fGVEqDVDMVFAS.[F]	P14618	PKM	0.727094	0.76267	0.573256	0.847352	0.980288	0.834391	1.13677	1.3403	1.24693	1.55095
[K].gDYPLEAVR.[M]	P14618	PKM	0.63691	0.523748	0.549917	0.796687	0.959567	0.732123	1.85048	1.46496	1.09721	1.3884
[T].eEmPPLEGDDDTSR.[M]	P07900-2	HSP90AA1	0.881296	0.780968	0.73661	1.08784	1.22915	0.736131	1.26574	1.1735	0.954235	1.15452
[E].emPPLEGDDDTSR.[M]	P07900-2	HSP90AA1	0.82795	0.719643	0.681404	1.04789	1.1438	0.724129	1.37354	1.22894	0.965489	1.28722
[R].yYTSASGDEMVSLk.[D]	P07900-2	HSP90AA1	0.946448	0.678111	0.678044	0.91615	1.12357	0.678125	1.57515	1.29711	0.995453	1.11183
[R].yYTSASGDEMVSLkDYcTR.[M]	P07900-2	HSP90AA1	0.900806	0.735778	1.1054	0.981015	1.25188	0.715285	1.03446	1.08642	1.00136	1.18758
[M].aAkkHLEINPDHSIIETLR.[Q]	P07900-2	HSP90AA1	1.19159	1.10245	0.993787	0.920082	1.4587	0.909993	1.01048	0.833368	0.830724	0.748824
[A].vTEEmPPLEGDDDTSR.[M]	P07900-2	HSP90AA1	0.935136	0.837831	0.798563	1.16093	1.28495	0.706986	1.24917	1.09207	0.868717	1.06566
[S].nSSDALDkIR.[Y]	P07900-2	HSP90AA1	0.566527	0.459194	0.499514	0.621969	0.869982	0.785532	2.02712	1.55334	1.22048	1.39634
[L].iSnSSDALDkIR.[Y]	P07900-2	HSP90AA1	0.879109	0.709664	0.730146	0.847795	1.18158	0.886378	1.4458	1.2528	0.974322	1.09242
[T].eEMPPLEGDDDTSRmEEVD.[-]	P07900-2	HSP90AA1	0.855224	0.87493	0.655983	1.20909	1.20871	0.736756	1.31621	1.114	0.913932	1.11516
[A].vTEEMPPLEGDDDTSRmEEVD.[-]	P07900-2	HSP90AA1	0.821053	0.835379	0.680601	1.15953	1.10272	0.737553	1.46023	1.08771	0.857303	1.25792
[N].sSDALDkIR.[Y]	P07900-2	HSP90AA1	0.783087	0.638246	0.609257	0.779095	1.28504	0.959882	1.62605	1.22855	0.993209	1.09759
[RHQ].tLTIVDTGIGMTk.[A]	P07900-2	HSP90AA1	0.921961	0.848831	0.66425	1.15489	1.2663	0.69008	1.22705	1.07979	1.00785	1.139
[E].mPPLEGDDDTSR.[M]	P07900-2	HSP90AA1	0.694133	0.636256	0.618151	0.919845	1.04508	0.697053	1.68669	1.34852	0.991248	1.36302
[NS].lIPnkQDR.[T]	P07900-2	HSP90AA1	0.733451	0.586491	0.562759	0.75511	1.16957	0.687654	1.9247	1.35352	0.972839	1.2539
[L].eINPDHSIIETLR.[Q]	P07900-2	HSP90AA1	0.793204	0.554532	0.60701	0.950864	1.03616	0.751356	1.65215	1.35814	1.00337	1.29321
[G].qSEEkPVPAAPVPSPVAPAPVPSR.[R]	Q9UK76	JPT1	0.808036	0.804352	0.736565	1.06848	1.32072	0.722568	1.47034	1.21031	0.833989	1.02465
[E].kPVPAAPVPSPVAPAPVPSR.[R]	Q9UK76	JPT1	0.834631	0.691028	0.707156	0.911823	1.0591	0.78463	1.48066	1.32412	0.980496	1.22636
[L].gqSEEkPVPAAPVPSPVAPAPVPSR.[R]	Q9UK76	JPT1	0.825488	0.620715	0.551097	1.02354	1.08036	0.961512	1.18644	1.21307	1.17807	1.35971
[E].ekPVPAAPVPSPVAPAPVPSR.[R]	Q9UK76	JPT1	0.807293	0.501412	0.552912	0.855014	0.888168	0.84127	1.54705	1.40041	1.20389	1.40257
[S].eEkPVPAAPVPSPVAPAPVPSR.[R]	Q9UK76	JPT1	0.738007	0.654445	0.606685	0.982552	1.04496	0.813878	1.43178	1.3139	1.12274	1.29106
[Q].sEEkPVPAAPVPSPVAPAPVPSR.[R]	Q9UK76	JPT1	0.795679	0.548388	0.492757	0.922661	1.01279	0.960607	1.35595	1.28542	1.22027	1.40549
[K].gEGDIHENVDTDLPGSL.[G]	Q9UK76	JPT1	0.830069	0.692568	0.728938	0.977484	1.10361	0.887729	1.39101	1.24595	1.00137	1.14127
[L].gFDEPTEQPVR.[K]	Q9UK76	JPT1	0.879349	0.615692	0.590368	1.05331	1.05723	0.853937	1.32735	1.21295	1.05059	1.35923
[F].sLGFDEPTEQPVR.[K]	Q9UK76	JPT1	0.867	0.697795	0.72885	1.01258	1.25732	0.875026	1.26653	1.18028	0.984328	1.13028
[S].sGDFLDLk.[GK]	Q9UK76	JPT1	2.23996	0.877741	1.01109	1.5038	1.15781	0.696178	0.705081	0.586791	0.571643	0.649901
[G].fDEPTEqPVR.[K]	Q9UK76	JPT1	1.07087	0.815163	0.833398	0.916035	1.37687	0.613643	1.38253	1.12449	0.898605	0.968398
[K].gVDPNSR.[N]	Q9UK76	JPT1	0.820028	0.688757	0.722017	1.11897	1.28741	0.64071	1.45404	1.15341	0.915702	1.19897
[K].fTASAGIQVVGDDLTVTNPk.[R]	P06733-1	ENO1	0.565474	0.539206	0.432052	0.632079	0.759356	0.809628	1.44024	1.68213	1.48689	1.65295
[R].aAVPSGASTGIYEALELR.[D]	P06733-1	ENO1	0.835479	0.673264	0.667217	0.884157	1.03377	0.935437	1.14088	1.33048	1.18648	1.31283
[K].vVIGmDVAASEFFR.[S]	P06733-1	ENO1	0.67032	0.718552	0.717315	0.819456	0.963919	0.896548	1.21803	1.26595	1.3257	1.40421
[K].aGYTDkVVIGMDVAASEFFR.[S]	P06733-1	ENO1	0.563487	0.509109	0.520775	0.571659	0.654699	1.06497	1.22634	1.50017	1.58261	1.80619
[K].vNqIGSVTESLqAck.[L]	P06733-1	ENO1	0.591793	0.589984	0.606163	0.848641	0.913751	0.962307	1.28394	1.42321	1.31607	1.46413
[R].hIADLAGNSEVILPVPA.[F]	P06733-1	ENO1	0.564294	0.431201	0.544926	0.648676	0.816879	0.804152	1.84711	1.70489	1.27661	1.36127
[R].aAVPSGASTGIYEALELRDNDkTR.[Y]	P06733-1	ENO1	0.740328	0.631405	0.730451	0.831485	0.886447	0.666729	1.677	1.35395	1.14916	1.33305
[R].gNPTVEVDLFTSk.[G]	P06733-1	ENO1	0.634627	0.512527	0.630567	0.772747	0.899132	0.808034	1.66472	1.42101	1.23723	1.4194
[S].gASTGIYEALELR.[D]	P06733-1	ENO1	0.462435	0.375292	0.421988	0.616078	0.66194	0.726189	2.40504	1.6989	1.21474	1.41741
[A].sTGIYEALELR.[D]	P06733-1	ENO1	0.468818	0.350677	0.441244	0.64282	0.750787	0.562743	2.52132	1.62754	1.14116	1.4929
[R].aAVPSGASTGIYEALELRDNDk.[T]	P06733-1	ENO1	0.689231	0.625101	0.596401	0.937225	0.916323	1.01531	1.39569	1.3243	1.17003	1.33039
[R].sGkYDLDFkSPDD.[P]	P06733-1	ENO1	0.510264	0.415431	0.426889	0.688612	0.797478	0.922091	2.01908	1.54566	1.30968	1.36482
[Q].vVGDDLTVTNPkR.[I]	P06733-1	ENO1	0.513445	0.362424	0.377213	0.504418	0.615727	1.20558	1.82428	1.68824	1.33663	1.57204
[R].sGETEDTFIAD.[L]	P06733-1	ENO1	0.65905	0.692641	0.588796	0.846423	0.931954	0.789464	1.82591	1.33483	1.02937	1.30156
[C].kAGAVEkGVPLYR.[H]	P06733-1	ENO1	0.632673	0.446314	0.480115	0.733634	0.794083	0.719404	2.06044	1.61027	1.10444	1.41862
[K].aVDkkAAGAGkVT.[K]	P68104	EEF1A1	0.320121	0.679482	0.702054	0.845698	1.08516	0.782911	1.46896	1.43419	1.20496	1.47648
[K].aVDkkAAGAGk.[V]	P68104	EEF1A1	0.545218	0.510033	0.604126	0.743369	0.847636	0.707959	2.08362	1.51426	1.12454	1.31924
[E].aLPGDNVGFNVk.[N]	Q05639	EEF1A2	0.535321	1.06494	1.09273	1.34835	1.76027	0.697464	0.857098	0.876734	0.78894	0.978152
[A].lPGDnVGFNVk.[N]	Q05639	EEF1A2	0.150041	0.155525	0.137889	0.235365	0.284788	0.737396	2.18095	2.35696	1.53642	2.22466
[T].fAPVNVTTEVk.[S]	P68104	EEF1A1	0.449815	0.68466	0.604291	0.706352	1.2134	0.60668	1.73806	1.70324	0.998376	1.29513
[L].dcILPPTRPTDkPLR.[L]	P68104	EEF1A1	1.1921	0.731156	0.792183	1.21072	0.979368	0.882498	1.24952	1.01213	0.892129	1.05819
[D].cILPPTRPTDkPLR.[L]	P68104	EEF1A1	0.663537	0.485075	0.540684	0.762995	0.91415	0.723381	1.92275	1.52893	1.12023	1.33826
[K].kIGYNPDTVAFVPIS.[G]	P68104	EEF1A1	0.724108	0.51599	0.644374	0.754777	0.831955	0.870207	1.72892	1.56069	1.10833	1.26065
[R].qTVAVGVIk.[NA]	Q05639	EEF1A2	0.224667	0.200564	0.215256	0.337233	0.398311	0.935595	2.27937	2.03215	1.57307	1.80378
[E].sFSDYPPLGR.[F]	P68104	EEF1A1	1.22563	1.03833	0.95384	1.05031	1.33022	0.739685	1.07968	0.932168	0.815319	0.834814
[K].iGGIGTVPVGR.[V]	Q05639	EEF1A2	0.245937	0.158822	0.274243	0.317655	0.514139	0.561296	3.30959	2.08868	1.14464	1.385
[TC].iLPPTRPTDkPLR.[L]	Q05639	EEF1A2	0.529653	0.414834	0.443457	0.798521	0.743971	0.973481	1.88619	1.48916	1.23892	1.48181
[F].aPVnVTTEVk.[S]	P68104	EEF1A1	0.423206	0.459594	0.485135	0.558097	0.923201	0.549511	1.97434	1.92304	1.02465	1.67923
[K].aVDkkAAGAGkVTk.[S]	P68104	EEF1A1	0.473145	0.624326	0.765337	0.825705	1.32861	0.484563	1.68326	1.49922	1.02981	1.28602
[G].gIGTVPVGR.[V]	Q05639	EEF1A2	0.79593	0.677962	0.730561	1.07249	1.02938	0.771983	1.24735	1.36398	0.968514	1.34186
[Y].kIGGIGTVPVGR.[V]	Q05639	EEF1A2	0.387442	0.364229	0.502755	0.505931	0.758745	0.836796	2.02694	1.76757	1.336	1.5136
[S].fSDYPPLGR.[F]	P68104	EEF1A1	0.692731	0.675069	0.700016	0.753663	0.923736	1.16229	1.47336	1.362	1.16353	1.0936
[K].kAAGAGkVT.[K]	P68104	EEF1A1	0.603795	0.572125	0.571365	0.849912	1.00588	0.688442	2.03351	1.42177	1.04882	1.20439
[Y].vTIIDAPGHR.[D]	P68104	EEF1A1	0.936642	0.683818	0.849823	1.02439	1.25998	0.618647	1.56163	1.1469	0.843553	1.07461
[F].aELkEkIDR.[R]	Q05639	EEF1A2	0.491859	0.564135	0.752432	0.70776	1.12085	0.943944	1.38663	1.33373	1.23897	1.45969
[Q].tVAVGVIk.[NA]	Q05639	EEF1A2	0.732831	0.598297	0.703865	0.960913	0.974141	0.762094	1.50435	1.38866	1.07875	1.2961
[S].aqkAqkAk.[-]	P68104	EEF1A1	1.09821	1.09431	1.06596	1.18907	1.55979	0.72056	1.03203	0.798168	0.699769	0.742126
[T].iIDAPGHR.[D]	Q05639	EEF1A2	1.41167	0.829579	0.919042	1.27763	1.0432	0.893098	1.05205	0.870055	0.801854	0.901829
[V].aAGVGEFEAGISk.[N]	Q05639	EEF1A2	1.19975	0.807677	1.02426	1.2322	1.30696	0.728154	1.01334	0.936181	0.788209	0.963267
[K].kLEDGPkFL.[K]	P68104	EEF1A1	0.496164	0.384869	0.413469	0.576404	0.750125	0.597723	2.72002	1.68343	1.14092	1.23688
[E].aLSEALPGDNVGFNVk.[N]	Q05639	EEF1A2	0.662609	0.657599	0.881591	0.909381	1.10303	0.603959	1.62836	1.23234	0.956099	1.36502
[F].sDYPPLGR.[F]	P68104	EEF1A1	1.13458	1.00647	0.895135	0.953514	1.30793	0.91759	1.08164	1.0152	0.8545	0.833451
[L].sEALPGDNVGFNVk.[N]	Q05639	EEF1A2	0.561524	0.622979	0.553894	0.900931	1.01394	0.687384	1.76937	1.4138	1.12032	1.35586
[R].vETGVLkPG.[M]	P68104	EEF1A1	0.634123	0.397515	0.434155	0.643788	0.696026	0.667869	2.43547	1.73239	1.14827	1.21038
[K].kLEDGPkFLkS.[G]	P68104	EEF1A1	0.408805	0.382935	0.429849	0.572646	0.765791	0.433358	2.88523	1.77108	1.06399	1.28631
[G].iGTVPVGR.[V]	Q05639	EEF1A2	0.381819	0.327288	0.349173	0.494726	0.55125	1.0099	1.95568	1.76075	1.48775	1.68166
[V].gVIkAVDk.[K]	P68104	EEF1A1	0.287378	0.20622	0.276268	0.360145	0.497122	0.525884	3.86733	1.77116	0.993686	1.21481
[A].gVGEFEAGISknGQTR.[E]	Q05639	EEF1A2	0.436367	0.46645	0.402763	0.626105	0.802617	0.718175	2.06928	1.69931	1.22534	1.55359
[K].iGGIGTVPVG.[R]	Q05639	EEF1A2	0.671093	0.457875	0.670072	0.784266	0.927201	0.628219	1.96649	1.47347	1.19499	1.22632
[K].kLEDGPk.[F]	P68104	EEF1A1	0.398976	0.330018	0.390182	0.526072	0.656302	0.695152	2.83782	1.67499	1.1728	1.31768
[K].lEDGPkFLkS.[G]	P68104	EEF1A1	0.723916	0.315514	0.455836	0.589187	0.607758	0.434418	2.96836	1.77971	0.997307	1.128
[K].aVDkkAAGAGkV.[T]	P68104	EEF1A1	0.558037	0.496862	0.611883	0.733927	0.863128	0.784491	1.77224	1.5173	1.20321	1.45892
[T].vAVGVIk.[NA]	Q05639	EEF1A2	1.35677	1.07796	1.32989	1.61129	1.74462	0.66783	0.55257	0.531641	0.547195	0.580237
[N].eVDEEEEEGGEEEEEEEEGDGEEEDGDEDEEAESATGk.[R]	P06454-1	PTMA	0.377907	1.27142	0.931029	0.603554	1.4234	0.817254	1.35185	1.10619	0.875032	1.24237
[A].aEDDEDDDVDTkk.[Q]	P06454-1	PTMA	1.46801	1.57171	1.20063	1.91956	2.00278	0.318229	0.546164	0.36579	0.275624	0.331495
[R].aAEDDEDDDVDTkk.[Q]	P06454-1	PTMA	1.40783	1.58466	0.97974	1.86398	1.80285	0.301563	0.781781	0.480851	0.346248	0.450495
[E].eGDGEEEDGDEDEEAESATGk.[R]	P06454-1	PTMA	0.746191	0.532698	0.6312	0.975084	1.041	0.570802	1.74927	1.39323	1.05568	1.30485
[K].eVVEEAEnGR.[D]	P06454-1	PTMA	0.770775	0.740511	0.707078	1.00816	1.22764	0.561585	1.79436	1.26163	0.855783	1.07247
[R].aAEDDEDDDVDTkkQkTDEDD.[-]	P06454-1	PTMA	0.990541	0.981446	0.790723	1.36153	1.5148	0.521548	1.35835	0.926719	0.692189	0.86216
[A].eDDEDDDVDTkkqkTDEDD.[-]	P06454-1	PTMA	0.462324	0.749695	0.517708	0.887039	1.03818	0.605805	1.76528	1.45175	1.11331	1.40891
[A].aEDDEDDDVDTkkqkTDEDD.[-]	P06454-1	PTMA	0.884441	0.922652	0.774112	1.23112	1.47471	0.72509	0.998989	0.986042	0.917483	1.08536
[K].eVVEEAEnGRD.[A]	P06454-1	PTMA	0.556405	0.533548	0.519141	0.663243	0.844649	0.624995	2.37487	1.57462	1.01541	1.29312
[K].dLkEkkEVVEEAEnGR.[D]	P06454-1	PTMA	0.967184	0.830407	0.860923	1.20132	1.31518	0.763661	1.1072	1.01022	0.912615	1.0313
[A].vDTSSEITTk.[D]	P06454-1	PTMA	0.845772	1.09686	0.983968	1.46253	1.80955	0.705067	0.675085	0.77481	0.796534	0.849822
[K].ekkEVVEEAEnGR.[D]	P06454-1	PTMA	0.886228	0.913061	0.872017	1.16906	1.37311	0.632636	1.3657	1.05125	0.791707	0.945236
[A].eDDEDDDVDTk.[K]	P06454-1	PTMA	0.545573	0.480471	0.462473	0.700774	0.780523	0.760019	1.97353	1.53536	1.21182	1.54945
[R].aAEDDEDDDVDTkkQ.[K]	P06454-1	PTMA	1.18157	0.6899	0.668285	1.10837	1.0883	0.604755	1.61793	1.15075	0.841967	1.04818
[A].aEDDEDDDVDTkkqk.[T]	P06454-1	PTMA	0.924793	0.800392	0.681634	1.09411	1.23703	0.617962	1.62826	1.11135	0.871858	1.03261
[A].eDDEDDDVDTkk.[Q]	P06454-1	PTMA	0.923359	1.38193	0.879281	1.4672	1.67142	0.485294	1.09765	0.768747	0.561401	0.763711
[V].dTSSEITTk.[D]	P06454-1	PTMA	0.269087	0.237691	0.297003	0.33607	0.457645	0.853601	1.99095	2.0134	1.58211	1.96244
[R].aAEDDEDDDVDTk.[K]	P06454-1	PTMA	1.56321	0.821733	1.37786	1.57086	2.05849	0.352654	0.785272	0.559181	0.426589	0.484143
[D].dEDDDVDTk.[K]	P06454-1	PTMA	0.383126	0.4234	0.350363	0.528808	0.572022	0.789682	2.53855	1.76961	1.16163	1.48282
[E].vVEEAENGR.[D]	P06454-1	PTMA	0.892389	0.828115	0.738808	1.10042	1.1664	0.79345	1.20752	1.12919	0.9526	1.1911
[E].dDEDDDVDTkkqkTDEDD.[-]	P06454-1	PTMA	0.349022	0.430374	0.45591	0.692215	0.929936	0.813725	1.88439	1.56468	1.34737	1.53238
[D].gDEDEEAESATGk.[R]	P06454-1	PTMA	0.731776	0.57114	0.733622	1.00002	1.19625	0.6668	1.6723	1.25556	0.98219	1.19034
[K].kEVVEEAEnGR.[D]	P06454-1	PTMA	0.815685	0.615699	0.644791	0.923013	1.00319	0.65685	1.80497	1.31466	1.00277	1.21837
[D].dEDDDVDTkkqkTDEDD.[-]	P06454-1	PTMA	0.275626	0.487832	0.346161	0.441232	0.786071	0.583925	2.66585	1.77079	1.16992	1.4726
[D].aAVDTSSEITTk.[D]	P06454-1	PTMA	0.858528	0.776825	0.743469	1.10766	1.25784	0.796082	1.15755	1.15754	0.955323	1.18918
[A].aEDDEDDDVDTk.[K]	P06454-1	PTMA	0.897476	0.577968	0.586964	0.811174	0.905569	0.857575	1.68329	1.35668	1.06237	1.26094
[K].dLkEkkEVVEEAEn.[G]	P06454-1	PTMA	0.928599	0.831784	0.860791	1.26659	1.25458	0.655839	1.17154	1.13471	0.867504	1.02805
[R].aIAELGIYPAVDPLDSTSR.[I]	P06576	ATP5F1B	0.539722	0.634652	0.575436	0.726049	1.39666	0.890054	1.20622	1.63635	1.17444	1.22042
[A].iAELGIYPAVDPLDSTSR.[I]	P06576	ATP5F1B	0.420316	0.695275	0.83848	1.09382	0.824029	1.20969	1.19848	1.54843	0.892759	1.27872
[L].gIYPAVDPLDSTSR.[I]	P06576	ATP5F1B	0.607772	0.563601	0.628729	1.0022	1.13554	0.709811	1.54136	1.42709	1.02494	1.35895
[K].qFAPIHAEAPEFmEm.[S]	P06576	ATP5F1B	0.726191	0.661841	0.619188	0.905988	1.04739	0.782254	1.61511	1.40896	1.01567	1.21742
[G].iYPAVDPLDSTSR.[I]	P06576	ATP5F1B	0.531317	0.472903	0.535241	0.644533	0.837923	0.67195	2.12547	1.64152	1.06631	1.47283
[L].dSGAPIkIPVGPETLGR.[I]	P06576	ATP5F1B	0.317687	0.320095	0.350793	0.505362	0.70473	0.517582	2.44554	2.01253	1.19212	1.63356
[M].vGPIEEAVAk.[A]	P06576	ATP5F1B	0.418341	0.633149	0.589937	0.716828	1.15329	0.704242	1.80133	1.60329	1.07435	1.30525
[A].eLGIYPAVDPLDSTSR.[I]	P06576	ATP5F1B	0.629847	0.731024	0.696645	1.06249	0.826885	1.10583	1.26601	1.48596	1.00808	1.18723
[Q].kVLDSGAPIkIPVGPETLGR.[I]	P06576	ATP5F1B	0.35236	0.634779	0.608644	0.64983	1.16915	0.7794	1.601	1.63748	1.14589	1.42146
[E].lGIYPAVDPLDSTSR.[I]	P06576	ATP5F1B	0.34989	0.407044	0.399553	0.513133	0.842814	0.545996	2.36357	1.98744	1.15009	1.44047
[S].gAPIkIPVGPETLGR.[I]	P06576	ATP5F1B	0.681287	0.65957	0.70345	1.04896	1.13109	0.693651	1.53239	1.28208	1.04526	1.22226
[F].aHLDATTVLSR.[A]	P06576	ATP5F1B	0.931192	0.781914	0.793659	0.995239	1.35844	0.659958	1.48224	1.12793	0.832783	1.03665
[M].nVIGEPIDER.[G]	P06576	ATP5F1B	0.654014	0.561462	0.53586	0.745642	1.01315	0.794808	1.69669	1.58024	1.11141	1.30673
[R].tIAmDGTEGLVR.[G]	P06576	ATP5F1B	0.682595	0.630602	0.62944	0.988373	1.26252	0.646484	1.57587	1.38722	0.986459	1.21044
[S].gVINLkDATSk.[V]	P06576	ATP5F1B	0.278203	0.500802	0.470875	0.599601	1.21262	0.65521	1.96515	1.63098	1.18362	1.50295
[V].gPIEEAVAk.[A]	P06576	ATP5F1B	0.374392	0.289089	0.315155	0.439918	0.518237	0.562943	2.54325	2.12723	1.16989	1.65989
[Y].mVGPIEEAVAk.[A]	P06576	ATP5F1B	0.729806	0.725059	0.737121	0.972228	1.29143	0.647016	1.59948	1.2838	0.936725	1.07734
[Q].tSPSPkAGAATGR.[I]	P06576	ATP5F1B	0.42865	0.523066	0.535199	0.652229	0.846126	0.764693	2.1761	1.71481	1.11721	1.24192
[A].vDPLDSTSR.[I]	P06576	ATP5F1B	0.88306	0.627432	0.600442	0.98457	1.0374	0.883625	1.50425	1.2576	1.028	1.19361
[K].aDkLAEEHSS.[-]	P06576	ATP5F1B	0.606579	0.612745	0.583765	0.830242	1.0816	0.743628	1.82896	1.42359	1.06461	1.22428
[N].vIGEPIDER.[G]	P06576	ATP5F1B	0.59842	0.472533	0.555095	0.75134	0.767314	0.821936	1.77325	1.59615	1.1682	1.49576
[K].qFAPIHAEAPEF.[M]	P06576	ATP5F1B	0.692239	0.565131	0.569677	0.863957	0.976016	0.739186	1.68306	1.44301	1.05031	1.41742
[F].ymVGPIEEAVAk.[A]	P06576	ATP5F1B	0.778641	0.552743	0.618343	0.775541	0.985313	0.717596	1.75415	1.43259	1.10045	1.28464
[T].sPSPkAGAATGR.[I]	P06576	ATP5F1B	0.428695	0.346856	0.431632	0.518053	0.639586	0.517214	2.48916	1.98492	1.05802	1.58586
[K].qFAPIHAEAPEFm.[E]	P06576	ATP5F1B	0.971563	0.859049	0.662841	1.08234	1.29336	0.699708	1.46739	1.12103	0.806504	1.03622
[A].mDGTEGLVR.[G]	P06576	ATP5F1B	0.882993	0.590535	0.732108	1.00818	1.14286	0.692103	1.60132	1.26792	0.957954	1.12403
[M].eLINNVAk.[A]	P06576	ATP5F1B	0.612367	0.61377	0.618332	0.929402	1.13952	0.699524	1.74378	1.34377	1.00453	1.295
[R].tIAMDGTEGLV.[R]	P06576	ATP5F1B	0.753348	0.582225	0.656772	0.913419	0.95713	0.780697	1.65731	1.38313	1.02297	1.293
[A].dkLAEEHSS.[-]	P06576	ATP5F1B	0.735229	0.58061	0.639292	0.893766	1.13885	0.664495	1.80006	1.36655	1.00753	1.17361
[R].iPSAVGYqPT.[L]	P06576	ATP5F1B	1.74453	0.562096	0.717434	1.15786	0.729372	1.06058	1.29085	1.04385	0.826122	0.867302
[D].kLAEEHSS.[-]	P06576	ATP5F1B	0.789757	0.762967	0.770729	1.04343	1.2814	0.827545	1.3631	1.14883	0.936873	1.07536
[K].vVDLLAPY.[A]	P06576	ATP5F1B	0.907128	0.746144	0.917079	1.23831	1.2893	0.644467	1.23084	0.982279	0.857013	1.18744
[M].dGTEGLVR.[G]	P06576	ATP5F1B	0.650842	0.471113	0.598622	0.726938	1.09164	0.706969	1.97986	1.50395	1.01898	1.25109
[M].gkLVPLk.[E]	P06576	ATP5F1B	0.645424	0.482113	0.506653	0.896364	0.967546	0.96259	1.65229	1.31215	1.31957	1.2553
[MYGRL].kLVPLk.[DEPQ]	P06576	ATP5F1B	0.537094	0.525695	0.584543	0.915098	1.23685	1.0684	1.32489	1.15905	1.21144	1.43695
[M].dELSEEDk.[L]	P06576	ATP5F1B	0.375873	0.335212	0.387408	0.493784	0.752678	0.487521	2.49192	1.85608	1.25697	1.56256
[QD].eLSEEDk.[QL]	Q13200	PSMD2	0.459077	0.363794	0.481663	0.626815	0.707723	0.587313	2.25787	1.76158	1.22802	1.52614
[Q].hLGESTVR.[T]	P06576	ATP5F1B	0.90244	1.0506	0.955759	1.13646	1.32818	0.585304	1.43949	0.960523	0.723212	0.918026
[A].qHLGESTVR.[T]	P06576	ATP5F1B	0.713335	1.05045	0.770231	1.01632	1.28433	0.806399	1.33596	1.15839	0.937657	0.926928
[S].vFAGVGER.[T]	P06576	ATP5F1B	0.642146	0.709395	0.639486	0.879762	1.01953	0.907463	1.45261	1.45349	1.1315	1.16462
[N].gETkTEESPASDEAGEkEAkSD.[-]	P05114	HMGN1	0.81445	2.05626	1.37983	1.38487	2.88292	0.25273	0.467523	0.273379	0.225972	0.262062
[S].akPPAkVEAkPk.[K]	P05114	HMGN1	1.17953	0.655066	1.03701	1.38249	1.82916	0.474237	1.19869	0.815591	0.670057	0.75817
[K].tEESPASDEAGEkE.[A]	P05114	HMGN1	1.21983	0.838415	0.85159	1.29336	1.18969	0.748203	1.14138	0.941313	0.841916	0.934299
[E].eSPASDEAGEkEAk.[S]	P05114	HMGN1	1.01659	0.98041	0.88133	1.38174	1.5226	0.552064	1.17366	0.882499	0.723498	0.885608
[K].tEESPASDEAGEkEAk.[S]	P05114	HMGN1	1.75482	1.05238	1.25224	1.95132	1.86496	0.448989	0.462057	0.374186	0.407522	0.431535
[K].tEESPASDEAGEkEAkSD.[-]	P05114	HMGN1	1.92005	1.2723	1.3581	2.10848	2.12374	0.32502	0.2742	0.194579	0.200101	0.223418
[T].eESPASDEAGEkEAkSD.[-]	P05114	HMGN1	1.11277	1.95984	0.954221	1.7425	1.98481	0.323049	0.67678	0.503715	0.320706	0.421615
[Q].eTkEDLPAEnGETk.[T]	P05114	HMGN1	1.68838	0.785802	1.03965	1.70259	1.50653	0.584972	0.76008	0.656364	0.59159	0.684045
[N].qETkEDLPAENGETk.[T]	P05114	HMGN1	1.05663	1.08677	1.00309	1.30827	1.70451	0.522277	1.10025	0.796754	0.676468	0.744978
[A].nQETkEDLPAEnGETk.[T]	P05114	HMGN1	1.18844	0.882903	0.91814	1.32912	1.38011	0.697256	0.959283	0.922111	0.784644	0.93799
[E].eSPASDEAGEkEAkSD.[-]	P05114	HMGN1	1.40421	1.60618	1.17665	1.95213	2.11928	0.361285	0.35343	0.335498	0.323003	0.368337
[N].gETkTEESPASDEAGEkEAk.[S]	P05114	HMGN1	0.739976	1.50841	1.08142	1.20573	2.34805	0.402755	0.88183	0.605235	0.452281	0.774319
[A].kPPAkVEAkPk.[K]	P05114	HMGN1	0.538586	0.3331	0.407611	0.558921	0.612874	0.715237	2.24787	1.79247	1.32539	1.46794
[S].aEGAAkEEPkR.[R]	P05114	HMGN1	0.990856	1.23218	1.09788	1.35707	1.86034	0.515933	1.08766	0.730601	0.536316	0.59117
[E].gAAkEEPkR.[R]	P05114	HMGN1	1.3958	1.48958	1.4272	1.69976	2.78448	0.18111	0.404449	0.242657	0.162826	0.212128
[A].akDkSSDkk.[V]	P05114	HMGN1	1.15074	1.40121	1.17419	1.49544	2.00631	0.395379	0.78377	0.580965	0.439672	0.572323
[Q].eVTqNSPAAR.[T]	Q09666-1	AHNAK	0.512195	0.636186	0.537469	0.769058	0.94056	0.736457	1.9062	1.49802	1.07217	1.39169
[D].iETPNLEGTLTGPR.[L]	Q09666-1	AHNAK	0.64889	0.601764	0.509187	0.851719	0.925612	0.658826	1.74111	1.42812	1.13733	1.49743
[S].dIDLNLkGPkIk.[G]	Q09666-1	AHNAK	0.788516	0.550148	0.513585	1.01901	0.931826	0.987917	1.35481	1.23211	1.15811	1.46396
[K].aEGPDVAVDLPkGDIN.[I]	Q09666-1	AHNAK	0.815509	0.583023	0.522628	0.81196	0.891729	0.825393	1.766	1.4711	0.962679	1.34997
[H].aqLPSLEGDLR.[G]	Q09666-1	AHNAK	0.789091	0.698315	0.573742	0.913608	0.94445	0.837029	1.62641	1.34137	0.996612	1.27937
[E].sEIkVPDVELk.[S]	Q09666-1	AHNAK	1.29049	0.70064	0.779414	1.09653	1.03817	0.925662	1.24982	0.993739	0.87986	1.04568
[Q].dVDLSLGSPkLkGDIk.[V]	Q09666-1	AHNAK	0.581284	0.698054	0.65284	0.851274	0.934532	1.02151	1.48667	1.29407	1.16674	1.31303
[S].eVDLNVAAPkVk.[G]	Q09666-1	AHNAK	0.627254	0.708282	0.680066	0.862546	0.949652	0.912871	1.60375	1.35224	1.08875	1.21458
[K].lNVGAPDVTLR.[G]	Q09666-1	AHNAK	0.651888	0.48159	0.539815	0.756274	0.815432	0.859197	1.81964	1.4688	1.15647	1.45089
[E].iDASVPELEGDLR.[G]	Q09666-1	AHNAK	0.730155	0.622328	0.627084	0.867634	0.943402	0.800453	1.54989	1.39417	1.10014	1.36473
[K].gPTVGGGLPGIGVq.[G]	Q09666-1	AHNAK	0.922697	0.777208	0.781291	0.979743	1.17449	0.938142	1.59063	1.29859	0.753554	0.783656
[S].gELkGPGVDVNLkGPR.[I]	Q09666-1	AHNAK	0.833526	0.637629	0.627836	0.812681	0.819393	1.0283	1.5387	1.25608	1.12582	1.32002
[N].iAGPDAALk.[V]	Q09666-1	AHNAK	0.951078	0.818248	0.70822	1.0196	1.10781	0.872627	1.34643	1.16005	0.942837	1.0731
[N].fSGSkVqTPEVDVk.[G]	Q09666-1	AHNAK	0.443717	0.515539	0.438352	0.661562	0.903852	0.72931	1.97482	1.61177	1.29896	1.42211
[D].aSVPELEGDLR.[G]	Q09666-1	AHNAK	0.799465	0.689216	0.584063	0.883124	0.958299	0.8895	1.61054	1.31536	0.979575	1.29086
[T].tkLNVGAPDVTLR.[G]	Q09666-1	AHNAK	0.75066	0.663457	0.701297	0.940758	1.01361	0.894757	1.44272	1.30559	1.04929	1.23785
[T].lkGPEVDLkGPR.[L]	Q09666-1	AHNAK	0.821451	0.483962	0.510501	0.796967	0.741418	1.05275	1.62671	1.3794	1.26881	1.31802
[K].gDVDVSVPEVEGk.[L]	Q09666-1	AHNAK	0.781351	0.604587	0.597269	0.994337	0.940211	0.939903	1.61089	1.29047	1.00334	1.23764
[D].iNIEGPDVkIPk.[F]	Q09666-1	AHNAK	0.507685	0.443033	0.511852	0.710761	0.732633	0.586306	2.38152	1.68227	1.11987	1.32407
[N].vAAPkVkGGVDVTLPR.[V]	Q09666-1	AHNAK	0.656065	0.670603	0.568012	0.693611	0.854287	1.15616	1.45615	1.43104	1.18453	1.32954
[K].gDVDVSLPEVEGE.[M]	Q09666-1	AHNAK	0.815146	0.615968	0.642588	0.898319	1.10692	0.789876	1.62552	1.32328	1.01826	1.16412
[K].gDFDVSVPkVEGT.[L]	Q09666-1	AHNAK	1.17045	0.654442	0.672196	1.02039	0.927864	0.949003	1.34418	1.1228	0.995272	1.1434
[H].gAAPDISVk.[G]	Q09666-1	AHNAK	1.18705	0.834794	0.845119	1.35498	1.0871	0.905288	1.11234	0.898468	0.79488	0.979989
[K].gEIDASVPELEGDLR.[G]	Q09666-1	AHNAK	0.667062	0.648346	0.856589	0.807199	1.07903	0.751698	1.63342	1.34396	0.966033	1.24666
[N].vDISAPkIEGEmqVPDVDIR.[G]	Q09666-1	AHNAK	0.555155	0.658564	0.560945	0.845627	1.13741	0.798271	1.6516	1.33055	1.09058	1.37131
[Q].gLEGNLqmPGIk.[S]	Q09666-1	AHNAK	0.747104	0.662031	0.642493	0.902071	0.969071	0.832142	1.61525	1.33248	0.987586	1.30977
[E].gDLkGPEVDLk.[G]	Q09666-1	AHNAK	1.22682	0.756478	0.715878	1.02541	0.975121	0.974188	1.25801	1.07615	0.965306	1.02665
[E].gDLkGPEVDIk.[G]	Q09666-1	AHNAK	1.22682	0.756478	0.715878	1.02541	0.975121	0.974188	1.25801	1.07615	0.965306	1.02665
[Q].lPSLEGDLR.[G]	Q09666-1	AHNAK	0.529943	0.491441	0.515734	0.762395	0.76891	0.999073	1.87103	1.44545	1.18093	1.43509
[K].lEVPDMNIR.[G]	Q09666-1	AHNAK	0.739788	0.576502	0.585606	0.849412	0.879849	0.818306	1.81094	1.33986	1.06204	1.3377
[K].sPSLDVTVPEAELN.[L]	Q09666-1	AHNAK	0.987391	0.574294	0.653921	0.860145	0.791291	0.889993	1.70326	1.27923	0.999521	1.26095
[K].gEGPDVHMTLPkGDIS.[I]	Q09666-1	AHNAK	0.98691	0.624124	0.64762	0.942985	0.955748	0.783917	1.65995	1.29484	0.903742	1.20016
[S].gDDEEYqR.[I]	Q09666-1	AHNAK	0.479033	0.660106	0.636133	0.99002	0.918689	0.870643	1.74221	1.26469	1.03669	1.40178
[R].gGVqVPAVDIS.[S]	Q09666-1	AHNAK	1.11027	0.663008	0.744141	1.04191	1.03445	0.930666	1.2867	1.08798	0.944149	1.15672
[D].iSAPkIEGEmqVPDVDIR.[G]	Q09666-1	AHNAK	0.728176	0.578327	0.573051	0.869593	1.07816	0.667353	1.73418	1.38696	1.13874	1.24546
[K].vqTPEVDVk.[G]	Q09666-1	AHNAK	0.74153	0.499777	0.550059	0.806562	0.885671	0.938094	1.61627	1.36851	1.20027	1.39326
[K].vkVPEVDVR.[G]	Q09666-1	AHNAK	1.14744	0.621521	0.630754	0.954172	0.833487	0.889992	1.61492	1.14126	0.988085	1.17837
[Q].gDVkGPQVALk.[G]	Q09666-1	AHNAK	0.931108	0.63526	0.676243	1.09677	0.992546	0.86804	1.32844	1.19217	1.00803	1.27139
[L].nVGAPDVTLR.[G]	Q09666-1	AHNAK	0.784473	0.769966	0.745217	1.01923	1.21236	0.790001	1.3796	1.17365	0.993041	1.13247
[G].aAPDISVk.[G]	Q09666-1	AHNAK	0.992242	0.742059	0.835422	0.998453	1.03167	0.796521	1.40385	1.03924	0.92363	1.2369
[K].gEGPEFDVN.[L]	Q09666-1	AHNAK	0.750867	0.557633	0.579877	0.889742	1.00757	0.709333	1.7949	1.4048	1.03059	1.27469
[K].gLDLGGR.[G]	Q09666-1	AHNAK	0.606141	0.518394	0.507696	0.732093	0.779459	0.717258	2.13447	1.5235	1.02362	1.45738
[K].wGDAGAEYVVESTGVFTTMEk.[A]	P04406-1	GAPDH	0.815036	0.843077	0.604824	0.921957	1.02102	0.878282	0.815763	1.31596	1.35455	1.42953
[K].vIHDNFGIVEGLmTTV.[H]	P04406-1	GAPDH	0.633555	0.577764	0.626618	0.813403	0.882185	0.708231	1.71067	1.49749	1.14361	1.40647
[M].gkVkVGVnGFGR.[I]	P04406-1	GAPDH	0.609293	0.747589	0.60697	0.934471	1.00647	0.854555	1.4658	1.2627	1.19334	1.31881
[K].lISWYDNEFGYSNR.[V]	P04406-1	GAPDH	0.459837	0.78736	0.582164	1.15716	0.952337	1.03883	1.45611	1.29226	1.14028	1.13366
[K].iISNAScTTNcLAPLAk.[V]	P04406-1	GAPDH	0.245037	0.422164	0.544373	0.976849	0.807059	0.954376	1.11198	1.48526	1.66845	1.78445
[K].gILGYTEHQVVSSDFNSDTHSSTFDAGAGIALNDHFVk.[L]	P04406-1	GAPDH	0.727403	0.524088	0.474145	0.58126	1.00741	0.773719	1.26747	1.62513	1.60556	1.41381
[K].ikWGDAGAEYVVESTGVFTTmEk.[A]	P04406-1	GAPDH	0.645304	0.747799	0.770726	0.752448	0.967451	0.815754	1.16408	1.32554	1.36597	1.44493
[T].qkTVDGPSGk.[L]	P04406-1	GAPDH	1.35187	1.0223	0.995666	1.2546	1.47703	0.609071	1.01806	0.832639	0.71745	0.721318
[K].aVGkVIPELnGk.[L]	P04406-1	GAPDH	1.42872	0.779556	1.00139	1.19879	1.23981	0.678961	1.10126	0.921785	0.766021	0.88371
[K].aVGkVIPELnGkLT.[G]	P04406-1	GAPDH	1.07564	1.06066	1.01769	1.09804	1.48689	0.590661	1.15145	0.951311	0.732183	0.835471
[R].vPTANVSVVDLTcR.[L]	P04406-1	GAPDH	0.734987	0.604489	0.637535	0.934856	1.12419	0.892094	1.40945	1.21302	1.09805	1.35132
[K].vIHDNFGIVEGLmTTVH.[A]	P04406-1	GAPDH	0.911581	0.512907	0.686947	0.946383	1.04998	0.751395	1.45809	1.46751	1.05969	1.15552
[Q].nIIPASTGAAk.[A]	P04406-1	GAPDH	0.694576	0.798524	0.654167	0.913726	1.23125	0.673467	1.55409	1.41552	0.9	1.16468
[V].gkVIPELnGk.[L]	P04406-1	GAPDH	1.26785	0.709372	0.933929	1.15932	1.25778	0.655818	1.30916	1.01997	0.741743	0.945061
[ND].vSVVDLTcR.[L]	P04406-1	GAPDH	0.671438	0.504165	0.785815	0.873925	0.911503	0.672501	1.89256	1.45846	0.996297	1.23334
[K].tVDGPSGk.[L]	P04406-1	GAPDH	1.05143	0.503826	0.640599	0.838765	0.762142	0.577402	2.06216	1.45844	0.939307	1.16593
[K].aVGkVIPELN.[G]	P04406-1	GAPDH	0.86725	0.593514	0.804841	0.974029	1.14162	0.624903	1.7112	1.28546	0.844364	1.15282
[K].vIPELnGkLT.[G]	P04406-1	GAPDH	0.84707	0.622278	0.870561	0.901974	1.11637	0.691135	1.64603	1.31479	0.895995	1.0938
[K].vIHDnFGIVE.[G]	P04406-1	GAPDH	0.806338	0.679186	0.75083	0.941836	1.04877	0.815808	1.58948	1.25468	0.959931	1.15314
[K].aEnGkLVIN.[G]	P04406-1	GAPDH	0.879733	0.547921	0.929345	0.928235	1.12366	0.61877	1.73797	1.21842	0.845289	1.17065
[G].gPEAAkSDETAAk.[-]	P04792	HSPB1	0.608912	1.23366	1.16492	1.46333	2.56941	0.445442	0.77465	0.633137	0.467	0.63954
[K].lATQSNEITIPVTFESR.[A]	P04792	HSPB1	0.915635	0.825316	0.748442	1.04205	1.21493	0.820358	1.30079	1.22205	0.844615	1.06582
[S].lDVnHFAPDELTVk.[T]	P04792	HSPB1	1.37244	1.06584	1.14665	1.23552	1.36759	0.597782	0.994153	0.801807	0.639656	0.778565
[Q].sNEITIPVTFESR.[A]	P04792	HSPB1	0.590162	1.71556	1.06925	1.15994	2.61826	0.419488	0.675673	0.622068	0.53219	0.597408
[S].nEITIPVTFESR.[A]	P04792	HSPB1	0.480284	1.20524	0.804247	1.04074	2.22282	0.468265	1.02199	1.03578	0.739558	0.981082
[R].aqLGGPEAAkSDETAAk.[-]	P04792	HSPB1	0.382677	1.86987	0.965286	1.08756	3.23706	0.336554	0.64146	0.516623	0.417766	0.545142
[R].aqLGGPEAAkS.[D]	P04792	HSPB1	0.916454	1.92666	1.24789	1.64825	2.29267	0.341372	0.517841	0.383421	0.327094	0.398341
[Q].lGGPEAAkSDETAAk.[-]	P04792	HSPB1	0.363012	1.29245	0.849115	0.871989	2.76263	0.382049	0.771472	0.949614	0.703176	1.0545
[R].qLSSGVSEIR.[H]	P04792	HSPB1	0.864611	1.37436	0.956823	1.4743	1.87551	0.466091	0.82306	0.767635	0.628754	0.768856
[N].hFAPDELTVk.[T]	P04792	HSPB1	2.44138	1.30279	1.08607	1.71395	1.27067	0.495898	0.49625	0.405434	0.384478	0.403077
[N].eITIPVTFESR.[A]	P04792	HSPB1	0.537412	0.983321	0.779859	1.06652	1.78904	0.506736	1.17755	1.11493	0.952192	1.09244
[H].fAPDELTVk.[T]	P04792	HSPB1	0.768543	0.656628	0.532952	1.08257	0.812957	1.4604	1.04378	1.0975	1.22564	1.31903
[R].aqLGGPEAAk.[S]	P04792	HSPB1	0.748901	1.01161	0.889258	1.14899	1.63195	0.504775	1.39275	1.03344	0.711074	0.92725
[Q].lSSGVSEIR.[H]	P04792	HSPB1	0.988223	1.35355	0.980662	1.45662	1.85705	0.481141	0.834761	0.730679	0.608878	0.708438
[L].dVNHFAPDELTVk.[T]	P04792	HSPB1	0.713337	0.525123	0.49801	0.839607	0.711926	0.785942	1.65677	1.61533	1.13141	1.52255
[A].kSDETAAk.[-]	P04792	HSPB1	1.76388	1.81791	1.27058	1.81636	2.20666	0.275012	0.255506	0.197616	0.205953	0.190529
[R].kYTLPPGVDPTQVSSS.[L]	P04792	HSPB1	0.867758	0.788529	0.668599	1.05601	1.09068	0.671601	1.54596	1.23099	0.952135	1.12774
[R].gPSWDPFR.[D]	P04792	HSPB1	1.06213	1.36284	0.587077	2.00009	1.4854	0.711823	0.583916	0.645501	0.685083	0.876135
[F].dQAFGLPR.[L]	P04792	HSPB1	0.780853	1.17192	0.864094	1.15005	1.63748	0.5998	1.14584	0.979345	0.76081	0.909806
[L].fDqAFGLPR.[L]	P04792	HSPB1	0.787584	0.881793	0.78968	1.06303	1.30707	0.687808	1.34144	1.11682	0.945915	1.07886
[E].iTIPVTFESR.[A]	P04792	HSPB1	0.535604	0.789472	0.620669	0.760372	1.57336	0.564365	1.40002	1.4791	0.943869	1.33317
[F].aPDELTVk.[T]	P04792	HSPB1	1.14699	0.520282	0.457371	0.848694	0.602819	1.19919	1.12589	1.19287	1.30045	1.60544
[L].sSGVSEIR.[H]	P04792	HSPB1	1.48756	1.3209	0.933999	1.55735	1.81299	0.456208	0.615353	0.599497	0.55755	0.658586
[Q].eSDDADEDYGR.[D]	Q9H1E3	NUCKS1	0.342236	0.386921	0.328809	0.464583	0.61859	0.579132	2.74925	1.91126	1.11887	1.50035
[S].qFQESDDADEDYGR.[D]	Q9H1E3	NUCKS1	0.538374	0.642003	0.576052	0.751546	0.952474	0.72394	1.8196	1.51563	1.13227	1.34812
[NY].sqEDSEDSEDkDVkTk.[K]	Q9H1E3	NUCKS1	1.29636	0.826349	0.787552	1.0726	1.07926	0.77738	1.28609	1.00902	0.888447	0.976943
[T].sPPPEkSGDEGSEDEAPSGED.[-]	Q9H1E3	NUCKS1	0.928957	1.34	0.854763	1.27798	1.45372	0.70912	0.864626	0.765958	0.802477	1.0024
[K].ekTPSPkEEDEEPESPPEkk.[T]	Q9H1E3	NUCKS1	0.596584	0.656117	0.538826	0.710894	0.831939	0.837099	1.88244	1.43294	1.19536	1.31781
[T].vTPSPVkGkGk.[V]	Q9H1E3	NUCKS1	0.391811	0.404384	0.421084	0.510759	0.773964	0.573514	2.19128	1.81725	1.38067	1.53527
[K].tPSPkEEDEEPESPPEkkT.[S]	Q9H1E3	NUCKS1	0.887508	1.23077	0.773628	1.09612	1.51877	0.642433	1.00502	0.971509	0.822125	1.05212
[K].tPSPkEEDEEPESPPEk.[K]	Q9H1E3	NUCKS1	0.62738	0.634462	0.570287	0.843441	0.889628	0.780058	1.82494	1.38329	1.14765	1.29887
[D].sEDEkEDHkNVR.[Q]	Q9H1E3	NUCKS1	0.482262	0.510671	0.550654	0.565811	0.735344	0.661294	2.30386	1.67043	1.13189	1.38778
[Y].sqFQESDDADEDYGR.[D]	Q9H1E3	NUCKS1	0.569208	0.678225	0.620322	0.786761	0.973497	0.751789	1.79347	1.47727	1.07984	1.26961
[Q].fqESDDADEDYGR.[D]	Q9H1E3	NUCKS1	0.47834	0.43371	0.33275	0.606586	0.599908	0.693809	2.37087	1.8104	1.14767	1.52597
[K].tPSPkEEDEEPESPPEkk.[T]	Q9H1E3	NUCKS1	0.631225	0.697551	0.485071	0.731247	0.905446	0.816292	1.79711	1.43076	1.18458	1.32072
[K].ekTPSPkEEDEEPESPPEk.[K]	Q9H1E3	NUCKS1	0.565713	0.565179	0.532207	0.687284	0.870211	0.741668	2.14761	1.47779	1.10411	1.30824
[K].tPSPkEEDEEPESPP.[E]	Q9H1E3	NUCKS1	0.412675	0.370223	0.384412	0.520177	0.564481	0.744498	2.59612	1.7564	1.18003	1.47098
[D].dADEDYGR.[D]	Q9H1E3	NUCKS1	0.925107	0.899654	0.891855	1.24136	1.29352	0.436941	1.59527	1.07857	0.701931	0.935787
[V].tPSPVkGkGk.[V]	Q9H1E3	NUCKS1	0.442968	0.223206	0.304051	0.414824	0.48179	0.39422	3.65348	1.79829	1.02689	1.26028
[A].aEIDEEPVSkAk.[Q]	E9PAV3	NACA	0.578016	0.348995	0.326483	0.590029	0.646679	0.791662	2.33155	1.65903	1.23125	1.49631
[A].aAAEIDEEPVSkAkqSR.[S]	E9PAV3	NACA	0.555086	0.640615	0.690798	0.910197	1.13243	0.857653	1.26249	1.3592	1.14729	1.44423
[A].eIDEEPVSkAk.[Q]	E9PAV3	NACA	0.635913	0.380467	0.376265	0.62787	0.643735	0.926822	1.99689	1.59535	1.3629	1.4538
[A].aAAEIDEEPVSkAk.[Q]	E9PAV3	NACA	0.930443	0.537443	0.540226	0.907614	0.991076	0.973434	1.47548	1.26256	1.12795	1.25377
[A].eIDEEPVSkAkQSR.[S]	E9PAV3	NACA	0.5888	0.574922	0.597012	0.828968	1.00834	0.790463	1.3583	1.42552	1.25034	1.57733
[E].iDEEPVSkAkQSR.[S]	E9PAV3	NACA	0.722325	0.655479	0.843988	0.916834	1.36008	0.599782	1.54009	1.26043	0.964549	1.13644
[A].aEIDEEPVSkAkQSR.[S]	E9PAV3	NACA	0.553879	0.574785	0.557057	0.834913	0.992125	0.812549	1.38359	1.4564	1.2274	1.60731
[AV].aAEIDEEPVSkAk.[Q]	E9PAV3	NACA	0.952544	0.582385	0.647056	1.00684	0.953354	0.910906	1.34753	1.2401	1.01171	1.34756
[A].eIDEEPVSk.[A]	E9PAV3	NACA	0.644136	0.460368	0.498325	0.747085	0.743468	0.711275	2.09953	1.57978	1.12726	1.38877
[A].aAAEIDEEPVSk.[A]	E9PAV3	NACA	0.738597	0.35745	0.400929	0.710444	0.655267	1.42673	1.23067	1.3276	1.50398	1.64833
[A].tPAkkAAVTPGk.[K]	P19338	NCL	0.400384	0.331864	0.437022	0.462369	0.729501	0.698041	2.2926	1.85335	1.2926	1.50227
[A].aVTPGkkAAATPAk.[K]	P19338	NCL	0.796057	0.947689	1.09379	1.12658	1.54868	0.585131	1.20646	0.989993	0.794208	0.911415
[K].aVTTPGkkGATPGkA.[L]	P19338	NCL	0.579131	0.696303	0.768471	0.762863	1.34406	0.539586	1.77559	1.35653	1.01084	1.16662
[E].eEEEEPVkEAPGkR.[K]	P19338	NCL	0.788944	0.454962	0.543658	0.77156	0.842172	0.524345	2.75827	1.28642	0.914116	1.11555
[E].eEEEPVkEAPGkR.[K]	P19338	NCL	0.5897	0.428414	0.65094	0.636758	0.893031	0.512913	2.88887	1.37012	0.860518	1.16874
[E].eEEEPVkEAPGk.[R]	P19338	NCL	0.370203	0.274162	0.309493	0.439119	0.569749	0.473728	3.94077	1.48731	0.951878	1.18358
[A].vATPAkkAAVTPGkk.[A]	P19338	NCL	0.634749	0.613923	0.655378	0.804547	1.15177	0.790405	1.53991	1.35692	1.11214	1.34026
[K].kVVVSPTk.[K]	P19338	NCL	0.728161	0.519071	0.601704	0.765177	0.969941	0.771492	1.38827	1.51473	1.26633	1.47512
[T].sAkkVVVSPTkk.[V]	P19338	NCL	0.898289	0.613826	0.615563	0.993278	1.08346	1.20436	0.79271	1.12347	1.3234	1.35165
[K].vVVSPTkkVAVATPAk.[K]	P19338	NCL	0.598833	0.54107	0.611158	0.655808	0.925582	0.869728	1.63173	1.56937	1.14805	1.44867
[E].eEEPVkEAPGkR.[K]	P19338	NCL	0.530617	0.33951	0.49153	0.528383	0.785282	0.517849	3.0135	1.51545	0.981631	1.29625
[T].vTPAkAVTTPGkk.[G]	P19338	NCL	0.831355	0.683039	0.94683	1.06268	1.34386	0.659582	1.53972	1.06306	0.874459	0.995405
[E].eEEEEEEPVkEAPGkR.[K]	P19338	NCL	0.496344	0.467896	0.749128	0.719307	1.02291	0.543435	2.45585	1.32348	0.99022	1.23142
[A].vATPAkkAAVTPGk.[K]	P19338	NCL	0.70545	0.588355	0.697149	0.69851	1.03631	0.674994	1.82567	1.49106	1.08813	1.19438
[K].kVVVSPTkkVA.[V]	P19338	NCL	1.31234	0.636929	0.757247	1.08806	0.914235	0.983018	1.18531	0.979094	0.978468	1.16531
[K].qkAAPEAk.[K]	P19338	NCL	0.644269	0.735866	1.03456	0.851623	1.4071	0.539719	1.71462	1.12485	0.940409	1.00699
[A].kAVTTPGkk.[G]	P19338	NCL	0.919525	0.603493	0.72097	0.834758	1.1027	0.671019	1.84226	1.29501	0.932182	1.07808
[K].aVTTPGkkGATPGkAL.[V]	P19338	NCL	1.18113	0.708764	0.911023	1.13393	1.3296	0.659303	1.1155	1.0408	0.938983	0.980981
[K].kVVVSPTkk.[V]	P19338	NCL	0.579361	0.550533	0.663075	0.713842	1.23799	0.746734	1.52988	1.40476	1.24486	1.32897
[K].qkAAPEAkk.[Q]	P19338	NCL	0.770853	1.16322	1.7438	1.08445	2.74782	0.297948	0.859641	0.525103	0.370811	0.436348
[A].kVVPVkAk.[N]	P19338	NCL	0.718901	0.481288	0.761242	0.825648	1.0212	0.805383	1.72156	1.34083	1.10943	1.21452
[E].aDAEkTFEEkQGTEIDGR.[S]	P19338	NCL	0.966357	0.635568	0.773511	0.866353	0.95886	0.847438	1.52811	1.25585	1.03286	1.13509
[K].fGYVDFESAEDLEk.[A]	P19338	NCL	0.603798	0.573732	0.477445	0.844238	0.880353	0.707168	1.94501	1.60231	1.07299	1.29296
[K].vVVSPTkkVA.[V]	P19338	NCL	1.1951	0.703449	1.10704	1.03794	1.14907	0.925218	1.03406	0.987652	0.826759	1.03372
[K].kVVVSPTkkVAVATPA.[K]	P19338	NCL	0.672184	0.601583	0.641315	0.939074	1.00743	0.853988	1.23364	1.27809	1.23744	1.53525
[A].iPAkGAknGk.[N]	P19338	NCL	0.264751	0.205426	0.199337	0.328425	0.437154	0.671938	3.15849	1.94264	1.30111	1.49074
[K].aVTTPGkkG.[A]	P19338	NCL	0.761175	0.670565	0.764532	1.00269	1.25474	0.675871	1.62898	1.24392	0.900574	1.09695
[K].aAVTPGkkAAATPA.[K]	P19338	NCL	0.541283	0.540165	0.542216	0.806395	0.93735	0.979662	1.34257	1.55275	1.26981	1.4878
[K].vVVSPTkk.[V]	P19338	NCL	0.74912	0.719715	0.846746	1.01058	1.38759	0.793313	1.26181	1.15268	0.958641	1.1198
[K].vVVSPTkkVAVATPA.[K]	P19338	NCL	0.549499	0.557366	0.783908	0.784848	1.13	0.825412	1.17588	1.34628	1.22804	1.61876
[K].aVTTPGkk.[G]	P19338	NCL	0.580996	0.507597	0.582118	0.733512	1.00813	0.623338	2.29408	1.49913	0.998687	1.1724
[A].dTSVDLEETGR.[V]	P25705-1	ATP5F1A	0.658536	0.586273	0.535293	0.769061	0.957059	0.661628	1.98717	1.53356	1.01625	1.29517
[D].tSVDLEETGR.[V]	P25705-1	ATP5F1A	0.835881	0.670674	0.704566	0.994763	1.06021	0.661962	1.71703	1.29946	0.905573	1.14988
[K].aVDSLVPIGR.[G]	P25705-1	ATP5F1A	0.983529	0.890054	0.683031	1.22968	1.3092	0.703602	1.01975	1.0655	0.9349	1.18076
[T].gAIVDVPVGEELLGR.[V]	P25705-1	ATP5F1A	0.809231	0.554142	0.57991	1.00787	1.0032	0.735209	1.67115	1.37278	1.04013	1.22637
[S].iAIDTIINqkR.[F]	P25705-1	ATP5F1A	0.631294	0.752658	0.635412	0.891594	1.14509	0.800039	1.5612	1.42026	0.981478	1.18097
[L].gNAIDGkGPIGSk.[T]	P25705-1	ATP5F1A	0.876371	0.635939	0.626326	0.980414	1.01792	0.747776	1.56195	1.34329	0.9689	1.2411
[N].aIDGkGPIGSkTR.[R]	P25705-1	ATP5F1A	0.809534	0.68762	0.727587	1.02102	1.1289	0.820135	1.20524	1.25357	0.989661	1.35674
[L].gNAIDGkGPIGSkTR.[R]	P25705-1	ATP5F1A	0.880936	0.827701	0.791864	1.13462	1.32665	0.80012	1.02494	1.08839	0.909787	1.21498
[F].gNDkLIkEGDIVkR.[T]	P25705-1	ATP5F1A	0.625705	0.547213	0.539068	0.76774	0.916761	0.696548	1.97574	1.49898	1.07869	1.35356
[L].gADTSVDLEETGR.[V]	P25705-1	ATP5F1A	0.701998	0.794816	0.889335	0.933338	1.48947	0.629487	1.41878	1.2039	0.84664	1.09224
[V].gLkAPGIIPR.[I]	P25705-1	ATP5F1A	0.685729	0.471698	0.500979	0.795184	0.671248	0.51072	1.98474	1.78634	1.03772	1.55564
[V].dVPVGEELLGR.[V]	P25705-1	ATP5F1A	0.583736	0.47071	0.510644	0.769361	0.866353	0.788916	1.97825	1.54641	1.08026	1.40536
[A].vDSLVPIGR.[G]	P25705-1	ATP5F1A	0.628762	0.570749	0.560468	0.822885	0.812195	0.83884	1.64371	1.56208	1.15381	1.4065
[T].sVDLEETGR.[V]	P25705-1	ATP5F1A	0.520753	0.462099	0.465035	0.693987	0.867321	0.731994	2.1218	1.62316	1.09084	1.42302
[K].eIVTNFLAGFEA.[-]	P25705-1	ATP5F1A	0.741013	0.694026	0.655445	0.898441	0.924412	0.797137	1.42947	1.30009	1.14779	1.41217
[L].sIGDGIAR.[V]	P25705-1	ATP5F1A	0.95934	0.809901	0.785836	1.20051	1.39338	0.755559	1.47456	1.10013	0.659824	0.860959
[N].aIDGkGPIGSk.[T]	P25705-1	ATP5F1A	0.675675	0.449808	0.551645	0.665329	0.850488	0.611008	2.17368	1.52745	1.11684	1.37808
[G].lkAPGIIPR.[I]	P25705-1	ATP5F1A	0.50472	0.556058	0.636081	0.839489	1.15756	0.574684	1.73604	1.55418	1.04109	1.40009
[D].vPVGEELLGR.[V]	P25705-1	ATP5F1A	0.807621	0.593354	0.609063	0.998289	1.25237	0.710071	1.73736	1.27273	0.920003	1.09914
[R].gYLDkLEPSkIT.[K]	P25705-1	ATP5F1A	1.22731	0.860886	0.894369	1.35873	1.29621	0.775489	1.10194	0.953175	0.707848	0.824028
[Y].lDkLEPSk.[I]	P25705-1	ATP5F1A	0.457116	0.3484	0.400962	0.499191	0.801601	0.764112	2.13103	1.64146	1.34246	1.61367
[S].vDLEETGR.[V]	P25705-1	ATP5F1A	0.980996	0.670086	0.664986	1.02312	1.06624	0.78576	1.6065	1.24938	0.886544	1.06638
[L].dTILPPTRPTDkPLR.[L]	Q05639	EEF1A2	1.0946	1.08099	1.04542	1.34832	1.5316	0.547663	1.13562	0.795981	0.640443	0.779367
[K].nVEkkSGGAGkVT.[K]	Q05639	EEF1A2	0.694928	1.56744	1.28941	1.84163	2.30073	0.307312	0.733905	0.455009	0.366767	0.442879
[A].dDEVDVDGTVEEDLGkSR.[E]	P14625	HSP90B1	0.600596	0.681213	0.576687	0.774922	1.00163	0.937818	1.4002	1.44857	1.17879	1.39957
[R].lISLTDENALSGNEELTVk.[I]	P14625	HSP90B1	0.676051	0.754164	0.585552	0.69404	0.986548	0.834199	1.12484	1.56132	1.35347	1.42982
[S].lTDENALSGNEELTVk.[I]	P14625	HSP90B1	0.795271	0.683761	0.751405	0.892162	1.06229	0.895711	1.39637	1.2288	1.09269	1.20154
[D].vDGTVEEDLGkSR.[E]	P14625	HSP90B1	0.356509	0.272192	0.390111	0.467992	0.520898	0.550531	2.38518	2.07489	1.30844	1.67325
[L].tDENALSGNEELTVk.[I]	P14625	HSP90B1	0.894909	0.59816	0.56761	0.923269	1.01358	0.92138	1.50304	1.29872	1.0474	1.23194
[W].eSDSNEFSVIADPR.[G]	P14625	HSP90B1	0.605569	0.662986	0.526795	0.769241	1.07797	0.843832	1.70268	1.48804	0.999195	1.32369
[E].vDVDGTVEEDLGkSR.[E]	P14625	HSP90B1	0.328682	0.313295	0.334568	0.415804	0.619259	0.630422	2.3007	2.07166	1.31859	1.66703
[D].gTVEEDLGkSR.[E]	P14625	HSP90B1	1.04806	0.621931	0.519956	1.08414	0.945914	0.933271	1.2927	1.27302	1.03032	1.25069
[T].vEEDLGkSR.[E]	P14625	HSP90B1	0.964002	0.578094	0.563176	0.939831	0.910803	0.971067	1.40959	1.3048	1.12955	1.22908
[R].sGYLLPDTkAY.[G]	P14625	HSP90B1	0.898026	0.808358	0.71595	1.20346	1.19044	0.793204	1.15227	1.1976	0.945398	1.09529
[QR].kkTFEINPR.[H]	P14625	HSP90B1	0.962626	1.02773	0.910446	1.12125	1.29074	0.906944	0.924912	1.02093	0.942858	0.891568
[K].cDkEkNLLHVT.[D]	P14625	HSP90B1	0.813342	0.581705	0.606201	0.838802	0.955663	0.873106	1.6904	1.41273	1.08685	1.14121
[R].sGYLLPDTk.[A]	P14625	HSP90B1	0.969986	0.599199	0.650375	0.998073	1.06877	0.732887	1.42343	1.2561	1.02307	1.27811
[S].qkkTFEINPR.[H]	P14625	HSP90B1	0.567829	0.930356	0.793657	1.22568	1.44893	0.819877	0.904221	1.03127	1.08984	1.18835
[K].tFEINPR.[H]	P14625	HSP90B1	0.483146	0.371196	0.455874	0.540519	0.795446	0.562055	2.71159	1.76308	1.16077	1.15633
[S].vSVPDSSGPER.[I]	P61978-2	HNRNPK	0.643075	0.715841	0.662598	0.792199	1.41392	0.849959	1.45473	1.27535	0.976104	1.21623
[R].gSYGDLGGPIITTQ.[V]	P61978-2	HNRNPK	0.730574	0.630843	0.713732	0.945511	0.989905	0.821844	1.59729	1.33327	0.978117	1.25891
[R].nLPLPPPPPPR.[G]	P61978-2	HNRNPK	0.632071	0.600282	0.572076	0.857546	0.937485	0.708656	1.82877	1.42603	1.11054	1.32654
[Q].sLAGGIIGVk.[G]	P61978-2	HNRNPK	0.691276	0.583638	0.595068	0.764645	1.07953	0.965987	1.48741	1.36501	1.12573	1.34171
[Q].vTIPkDLAGSIIGkGGQR.[I]	P61978-2	HNRNPK	0.983288	0.727293	0.829546	1.17799	1.05538	0.768381	1.25589	1.18892	0.983053	1.03026
[T].qVTIPkDLAGSIIGkGGqR.[I]	P61978-2	HNRNPK	0.957406	0.696808	0.737916	1.00719	0.980291	0.705798	1.55999	1.27142	0.962265	1.12092
[S].lAGGIIGVk.[G]	P61978-2	HNRNPK	0.807547	0.799238	0.78584	1.01315	1.21479	1.03205	1.12242	1.07337	0.997616	1.15398
[K].iDEPLEGSEDR.[I]	P61978-2	HNRNPK	1.18098	0.767098	0.816328	1.19261	0.964367	0.767238	1.45184	1.04495	0.853679	0.960909
[S].ikIDEPLEGSEDR.[I]	P61978-2	HNRNPK	1.03119	0.736413	0.824974	1.0991	1.01524	0.763292	1.43901	1.13094	0.946813	1.01303
[I].dEPLEGSEDR.[I]	P61978-2	HNRNPK	0.565549	0.511215	0.479638	0.717499	0.841666	0.691968	2.03678	1.57986	1.07472	1.50111
[N].lPLPPPPPPR.[G]	P61978-2	HNRNPK	0.680807	0.579177	0.630165	0.877819	0.980565	0.687831	1.97291	1.39642	0.982022	1.21229
[R].gSYGDLGGPIITT.[Q]	P61978-2	HNRNPK	0.862014	0.590325	0.654521	0.869896	0.90525	0.706509	1.66342	1.33623	1.12915	1.28268
[Y].kGSDFDcELR.[L]	P61978-2	HNRNPK	1.03201	0.810406	0.875626	1.34318	1.14617	0.719914	1.1681	1.03633	0.84731	1.02095
[V].sVPDSSGPER.[I]	P61978-2	HNRNPK	0.401097	0.407481	0.335923	0.563161	0.678539	0.686008	2.44717	1.80648	1.19286	1.48128
[L].aGGIIGVk.[G]	P61978-2	HNRNPK	0.503745	0.484541	0.490502	0.606065	0.77017	1.06075	1.66747	1.57859	1.27043	1.56775
[Y].dYSYAGGR.[G]	P61978-2	HNRNPK	0.507458	0.597099	0.59722	0.794663	1.0257	0.637329	2.01494	1.47341	0.998477	1.35371
[R].dYDDMSPR.[R]	P61978-2	HNRNPK	0.746779	0.51455	0.584744	0.809941	0.906133	0.614733	2.11709	1.47989	0.997724	1.22842
[LG].pLPPPPPPR.[G]	P61978-2	HNRNPK	0.688605	0.562772	0.690039	0.78002	1.09409	0.667695	1.85335	1.40909	1.0009	1.25344
[A].aAPPAEkAPVkkk.[A]	P16403	HIST1H1C	1.51567	0.82968	1.37724	1.47556	1.59289	0.502075	0.886267	0.657844	0.547577	0.615192
[GA].gYDVEkNNSR.[I]	P16401	HIST1H1B	0.718534	0.817633	1.1562	0.974987	1.26733	0.621607	1.44587	1.10031	0.769027	1.12851
[A].aGYDVEkNNSR.[I]	P10412	HIST1H1E	0.908781	0.800142	0.897023	0.994469	1.25746	0.65762	1.66757	1.09958	0.772998	0.944356
[A].sGPPVSELITk.[A]	P10412	HIST1H1E	0.463407	0.434344	0.595516	0.595454	0.757372	0.528962	2.88383	1.65228	0.884259	1.20458
[K].aSGPPVSELITk.[A]	P10412	HIST1H1E	0.46056	0.421241	0.490261	0.614866	0.790224	0.849143	2.37252	1.51436	1.13177	1.35506
[TS].gPPVSELITk.[A]	P16401	HIST1H1B	0.219952	0.178133	0.196465	0.262709	0.37829	0.323535	4.26097	2.07167	0.851127	1.25715
[R].kASGPPVSELITk.[A]	P10412	HIST1H1E	0.345319	0.409927	0.546967	0.540288	0.75598	0.528284	2.67989	1.70913	1.04679	1.43742
[K].aSGPPVSELITkA.[V]	P10412	HIST1H1E	0.458376	0.482679	0.568548	0.589251	0.854724	0.538714	2.77369	1.60418	0.962342	1.1675
[A].aAPPAEkAPVkk.[K]	P16403	HIST1H1C	1.1837	0.78095	1.26599	1.15288	1.77201	0.438072	1.23719	0.823667	0.625695	0.719852
[A].aAPPAEkAPVk.[K]	P16403	HIST1H1C	1.29071	0.774721	1.06542	1.18136	1.57687	0.559326	1.21464	0.873584	0.683179	0.780194
[G].yDVEkNNSR.[I]	P16401	HIST1H1B	0.235296	0.224096	0.287365	0.316845	0.494373	0.484091	3.47095	2.03265	0.993463	1.46087
[L].vSkGTLVQTk.[G]	P16401	HIST1H1B	0.530538	0.670229	0.889921	0.717733	1.11585	0.679639	1.69736	1.36038	1.01939	1.31896
[KR].gTGASGSFk.[L]	P16401	HIST1H1B	0.617822	0.694176	1.0194	0.889159	1.12481	0.621713	1.9222	1.17698	0.855594	1.07814
[R].kASGPPVSELIT.[K]	P10412	HIST1H1E	0.861681	0.646469	0.800547	0.981392	1.11187	0.773831	1.61323	1.16836	0.895352	1.14727
[K].gTGASGSFkLN.[K]	P16401	HIST1H1B	0.553155	0.598621	0.642662	0.766018	0.894641	0.550411	2.32564	1.46877	0.897762	1.30232
[K].aAkPkVVkP.[K]	P16403	HIST1H1C	0.526345	0.502855	0.680926	0.669944	1.17526	0.415569	2.51839	1.51621	0.946667	1.04784
[K].sLVSkGTLVqTk.[G]	P16401	HIST1H1B	0.570678	0.679903	0.866488	0.760428	1.0628	0.550959	1.99281	1.46969	0.904734	1.14151
[K].aVkPkAAkPk.[ATV]	P16401	HIST1H1B	0.514186	0.402024	0.462524	0.596264	0.757821	0.560723	2.36116	1.72974	1.17367	1.44189
[K].aASGEAkP.[K]	P16401	HIST1H1B	0.501639	0.518879	0.577169	0.65254	0.903314	0.654353	2.37313	1.49855	1.00797	1.31246
[K].aAkPkVVkPk.[K]	P16403	HIST1H1C	0.854235	0.921357	0.793679	1.26095	1.50147	0.501381	1.38321	1.09087	0.754623	0.938226
[K].aAGGATPkkS.[A]	P16403	HIST1H1C	0.957083	0.8407	1.1382	1.18383	1.7226	0.495085	1.20493	0.907582	0.680098	0.869887
[L].qqQADDAEER.[A]	P06753-2	TPM3	0.89255	0.493155	0.45655	0.825397	0.70321	1.15203	1.67837	1.31165	1.11363	1.37346
[K].eAkHIAEEADR.[K]	P67936	TPM4	0.837152	0.677714	0.675038	1.05378	0.956541	0.909748	1.52743	1.1829	1.02592	1.15378
[L].qkLEEAEkAADESER.[G]	P09493-10	TPM1	0.556527	0.47809	0.48015	0.647476	0.818295	0.805548	1.89888	1.57127	1.23996	1.5038
[L].vIIEGDLER.[T]	P06753-2	TPM3	0.885781	0.513634	0.53344	0.938791	0.82083	0.91062	1.63915	1.35492	1.08053	1.3223
[L].eEAEkAADESER.[G]	P09493-10	TPM1	0.482309	0.437901	0.470578	0.615663	0.800074	0.678247	2.07986	1.7011	1.21098	1.52328
[A].kHIAEEADR.[K]	P67936	TPM4	1.21206	1.07878	0.941371	1.27708	1.55585	0.607034	1.04343	0.857568	0.661956	0.764878
[Q].qQADDAEER.[A]	P06753-2	TPM3	0.647567	0.463512	0.471989	0.669976	0.708984	0.92961	1.91989	1.49913	1.15336	1.53598
[Q].lVEEELDR.[A]	P09493-10	TPM1	0.698458	0.688737	0.613756	0.874179	0.871356	1.12946	1.31847	1.29605	1.15849	1.35104
[L].dqTLLDLnEm.[-]	P06753-2	TPM3	0.792357	0.617177	0.742454	0.985079	1.04928	0.762705	1.60571	1.27151	0.978865	1.19486
[Q].qADDAEER.[A]	P06753-2	TPM3	0.768814	0.319911	0.427216	0.78589	0.565151	1.10333	1.67215	1.42273	1.27385	1.66096
[LTQ].tIEAVkR.[LK]	P06753-2	TPM3	0.576481	0.550433	0.541846	0.703363	0.839135	0.996179	1.75055	1.5315	1.24462	1.26589
[K].hIAEEADR.[K]	P67936	TPM4	0.849164	0.407653	0.477231	0.695058	0.750839	0.730988	2.09299	1.51411	1.14085	1.34111
[R].aLkDEEkMELq.[E]	P06753-2	TPM3	1.02157	0.659481	0.668778	0.90223	0.870238	1.26278	1.20865	1.15739	1.08355	1.16532
[Q].tLLDLNEm.[-]	P06753-2	TPM3	0.827955	0.787041	0.778568	1.0142	1.02074	0.958935	1.42132	1.10361	0.983627	1.104
[S].gLTVEVDAPkSQDLAk.[I]	P05783	KRT18	0.611575	0.796427	1.18069	1.12039	2.26276	0.514394	1.2075	0.83027	0.646883	0.829117
[E].vGAAETTLTELR.[R]	P05783	KRT18	0.654434	0.933574	0.970478	1.28467	2.20133	0.49371	1.05236	0.904553	0.647945	0.856946
[Q].sAEVGAAETTLTELR.[R]	P05783	KRT18	0.726485	0.954703	0.825252	0.998085	1.41134	0.830035	1.13105	1.11426	0.937958	1.07083
[L].tVEVDAPkSQDLAk.[I]	P05783	KRT18	0.867308	0.991461	1.57325	1.36658	2.4278	0.387082	0.811562	0.586241	0.418315	0.570395
[G].aAETTLTELR.[R]	P05783	KRT18	1.26503	0.945471	1.04135	1.54004	1.47435	0.545676	0.993557	0.811023	0.647791	0.735701
[K].vVSETnDTkVL.[R]	P05783	KRT18	1.32649	1.01651	1.14435	1.28792	1.38167	0.581354	0.987987	0.848866	0.637006	0.787847
[A].eVGAAETTLTELR.[R]	P05783	KRT18	0.779544	0.622729	0.658974	0.914256	1.07232	0.722163	1.64603	1.32239	0.995738	1.26585
[K].vVSETNDTk.[V]	P05783	KRT18	1.54638	0.776645	1.38831	1.58405	1.7343	0.3746	0.890717	0.629588	0.485583	0.589829
[M].qTIqkTTTR.[R]	P05783	KRT18	0.72206	1.48964	1.27416	1.45263	2.54067	0.351358	0.700769	0.544474	0.413359	0.51088
[Y].aGAGGSGSR.[I]	P05783	KRT18	0.872146	1.18084	1.6095	1.81117	3.34447	0.119046	0.406004	0.268495	0.129837	0.258499
[A].eTTLTELR.[R]	P05783	KRT18	2.11231	1.19896	1.43996	2.08554	1.83159	0.262325	0.319066	0.274951	0.213103	0.262198
[R].aqYDELAR.[K]	P05783	KRT18	1.21906	0.94592	1.11678	1.46949	1.53307	0.446351	1.09291	0.808233	0.608478	0.759713
[L].eIDLDSMR.[N]	P05783	KRT18	1.02777	0.913503	0.960105	1.22441	1.46807	0.659245	1.16949	0.922388	0.768028	0.886981
[K].nHEEEVkGL.[Q]	P05783	KRT18	0.943527	0.849461	0.847653	1.02237	1.31938	0.681908	1.39024	1.10587	0.852781	0.986821
[E].tNDTkVLR.[H]	P05783	KRT18	1.92245	1.27211	1.24808	1.61989	1.8485	0.343726	0.601196	0.444411	0.319011	0.380631
[Q].tIQkTTTR.[R]	P05783	KRT18	1.12307	1.65493	1.57512	1.6448	2.29954	0.257951	0.418407	0.349706	0.308928	0.367546
[M].sETAPAAPAAPAPAEkTPVkk.[K]	P10412	HIST1H1E	0.681509	0.590991	0.800729	0.894959	1.34057	0.638896	1.70748	1.29816	0.929254	1.11745
[A].pAAPAPAEkTPVkk.[K]	P10412	HIST1H1E	0.972305	0.73811	0.857728	1.10786	1.39888	0.569914	1.4498	1.1327	0.782093	0.990614
[K].aVkPkAAkPkT.[A]	P10412	HIST1H1E	0.914231	0.97116	1.18808	1.23524	1.84717	0.475937	1.1259	0.791612	0.656514	0.794151
[T].aPAAPAAPAPAEk.[T]	P10412	HIST1H1E	0.983073	0.766974	0.78571	1.13856	1.23377	0.715306	1.2864	1.11765	0.894415	1.07814
[K].aTGAATPkk.[S]	P10412	HIST1H1E	0.749917	0.981126	1.00003	1.19815	1.66976	0.788906	1.11604	0.925211	0.732274	0.838582
[M].eLPTEkEVALVk.[D]	P27816-1	MAP4	0.815299	0.556327	0.541769	0.835333	0.841847	1.1099	1.39246	1.30538	1.24466	1.35703
[K].dmELPTEkEVALVk.[D]	P27816-1	MAP4	0.745868	0.5701	0.527684	0.861277	0.986169	0.809859	1.50948	1.47406	1.14423	1.37126
[A].lTEDqVPALk.[T]	P27816-1	MAP4	1.13295	0.943648	0.922532	1.3058	1.48195	0.633565	1.02008	0.882551	0.75812	0.918813
[K].dVTPPPETEVVLIk.[N]	P27816-1	MAP4	0.729643	0.632418	0.648195	0.876006	0.929931	0.972441	1.37119	1.26673	1.19391	1.37954
[K].tqPTSLPkqPAPTTIGGL.[N]	P27816-1	MAP4	0.790735	0.5288	0.65487	0.833953	0.846279	0.697965	1.86117	1.40614	1.1119	1.2682
[K].tEGGGSEAPLcPGPPAGEEPAIS.[E]	P27816-1	MAP4	0.719076	0.69399	0.615845	0.821001	0.864035	0.796873	1.71745	1.32207	1.09777	1.35189
[L].gkDVTPPPETEVVLIk.[N]	P27816-1	MAP4	0.746177	0.595873	0.679782	0.927955	0.939636	0.902342	1.41675	1.40089	1.11305	1.27755
[K].nVVLPTETEVAPAkDVT.[L]	P27816-1	MAP4	0.570145	0.47964	0.543954	0.716137	0.891526	0.71605	1.87443	1.52565	1.25778	1.42469
[L].tEPSPDIEGEIkR.[D]	P27816-1	MAP4	0.906306	1.20916	0.992017	1.22271	2.00483	0.537528	1.00656	0.793642	0.608266	0.718985
[G].sLDNVGHLPAGGAVk.[TI]	P27816-1	MAP4	0.775574	0.692655	0.634348	0.879532	0.915793	0.941671	1.48479	1.35321	1.15684	1.16558
[T].nTSAPDLkNVR.[S]	P27816-1	MAP4	0.864085	0.672717	0.680345	0.955783	1.02909	0.938384	1.27315	1.29036	1.0776	1.21848
[L].tEPSPDIEGEIk.[R]	P27816-1	MAP4	0.820253	0.567713	0.579324	0.806504	0.840505	0.87738	1.77962	1.39097	1.09209	1.24564
[L].dNVGHLPAGGAVk.[TI]	P27816-1	MAP4	0.788562	0.55758	0.540741	0.802916	0.912739	0.889232	1.64232	1.41214	1.10218	1.35159
[K].nVVLPTETEVAPA.[K]	P27816-1	MAP4	0.661018	0.564778	0.528799	0.934148	0.941413	0.692831	1.8747	1.35787	1.14133	1.30311
[A].aVASTGPSSR.[S]	P27816-1	MAP4	1.19141	0.942285	1.23818	1.26671	1.35639	0.72489	1.10778	0.975051	0.55609	0.641213
[A].dALTEPSPDIEGEIk.[R]	P27816-1	MAP4	0.802532	0.622092	0.677387	0.998088	0.988652	0.757748	1.64851	1.3413	0.966728	1.19696
[K].nVVLPTETEVAPAkD.[V]	P27816-1	MAP4	0.735229	0.500696	0.607344	0.859318	0.909512	0.797788	1.90661	1.40042	1.03496	1.24812
[K].hkPGGGDVkIE.[S]	P27816-1	MAP4	0.812584	0.769346	0.777938	0.918119	0.969481	1.1035	1.18978	1.12928	1.21145	1.11851
[T].sAPDLkNVR.[S]	P27816-1	MAP4	0.758298	0.654579	0.669866	0.906911	0.788243	1.18642	1.17279	1.2563	1.2273	1.3793
[K].dMESPTkL.[D]	P27816-1	MAP4	0.577442	0.437057	0.4219	0.663137	0.702545	0.80903	2.10182	1.60535	1.22237	1.45935
[K].gISEDSHLE.[S]	P27816-1	MAP4	0.68515	0.634792	0.730896	0.984962	1.02984	0.721034	1.72768	1.2962	0.979198	1.21024
[K].dTHEDHDTSTENTDESNHD.[P]	P43487	RANBP1	0.543432	0.57099	0.615972	1.08623	0.908998	0.879198	1.3476	1.28631	1.09361	1.66765
[K].dTHEDHDTSTENTDESN.[H]	P43487	RANBP1	0.71838	0.553568	0.618686	0.826444	0.948345	0.850851	2.33655	1.35686	0.512454	1.27786
[L].sVkEETkEDAEEkQ.[-]	P43487	RANBP1	0.7604	0.596379	0.61704	0.882879	1.02618	0.920982	1.38507	1.30346	1.18024	1.32738
[K].eETkEDAEEkq.[-]	P43487	RANBP1	0.457036	0.398081	0.428848	0.578886	0.728791	0.691117	2.36726	1.69863	1.19139	1.45997
[A].sENDLPEWkER.[G]	P43487	RANBP1	0.604297	0.480336	0.585541	0.645798	0.941188	0.878382	1.85103	1.54644	1.08019	1.38681
[L].eEDEEELFkMR.[A]	P43487	RANBP1	0.899106	0.849532	0.796582	1.0453	1.28727	1.07466	0.92912	1.07592	0.986473	1.05604
[F].aSENDLPEWkER.[G]	P43487	RANBP1	0.659175	0.4446	0.64199	0.745556	0.849711	1.02102	1.51278	1.41443	1.23498	1.47575
[K].dTHEDHDTSTEN.[T]	P43487	RANBP1	0.69474	0.666225	0.645992	0.894131	1.04202	0.582058	1.94996	1.28288	1.07459	1.1674
[P].iVSLPEQEIk.[T]	P43487	RANBP1	0.969602	0.717874	0.86204	1.10782	1.12613	0.729263	1.33379	1.11612	0.907161	1.1302
[L].eEDEEELFk.[M]	P43487	RANBP1	0.372019	0.387445	0.503916	0.574923	0.873383	0.81976	1.9313	1.63907	1.2877	1.61048
[K].dTHEDHDTSTE.[N]	P43487	RANBP1	0.957854	0.558261	0.51329	0.962591	0.815809	0.886251	1.63567	1.33648	1.0811	1.2527
[M].eLkPNAGSDR.[A]	P43487	RANBP1	0.24635	0.256791	0.26976	0.373713	0.523155	0.848575	2.43072	1.91611	1.36338	1.77145
[K].aTGPPVSELITk.[A]	P16401	HIST1H1B	0.626829	0.586183	0.729319	0.883987	0.879068	0.601384	2.23325	1.38489	0.891509	1.18358
[A].tGPPVSELITk.[A]	P16401	HIST1H1B	0.445636	0.386916	0.573694	0.522524	0.658183	0.533273	2.83807	1.69157	1.02372	1.32641
[R].kATGPPVSELITkA.[V]	P16401	HIST1H1B	0.901791	0.549953	0.639107	0.801782	0.845129	0.641418	2.07873	1.48128	0.949455	1.11135
[R].kATGPPVSELITk.[A]	P16401	HIST1H1B	0.619054	0.485208	0.713398	0.798174	0.840059	0.670169	2.36254	1.45456	0.869896	1.18694
[K].aTGPPVSELITkA.[V]	P16401	HIST1H1B	0.530518	0.530677	0.542039	0.706631	0.903711	0.702707	2.2485	1.47108	0.967093	1.39704
[T].aTPAPVEkSPAkk.[K]	P16401	HIST1H1B	0.737093	0.720675	0.854317	0.994524	1.53674	0.573536	1.59634	1.128	0.870499	0.988269
[K].kPAGATPk.[K]	P16401	HIST1H1B	0.419427	0.435837	0.355196	0.530729	0.690365	0.633637	2.74511	1.84351	1.08995	1.25624
[T].aTPAPVEkSPAkkk.[A]	P16401	HIST1H1B	0.964366	0.791333	0.944226	1.05719	1.593	0.642852	1.36949	1.00989	0.749016	0.878628
[A].gGYDVEkNnSR.[I]	P16401	HIST1H1B	0.570694	0.670544	0.920617	0.861483	0.96917	0.60121	1.95069	1.33732	0.91663	1.20164
[K].sPAkPkAVkPk.[A]	P16401	HIST1H1B	0.373643	0.297146	0.380119	0.469275	0.614436	0.451997	2.93492	1.98842	1.1174	1.37264
[K].aVkPkAAkPkA.[A]	P16401	HIST1H1B	0.803029	0.718547	0.939202	1.00324	1.43276	0.596869	1.44815	1.12804	0.889799	1.04036
[K].sPAkPkAVkP.[K]	P16401	HIST1H1B	0.483627	0.513825	0.537083	0.741217	0.860475	0.703572	2.41668	1.54257	0.997572	1.20338
[T].aTPAPVEk.[S]	P16401	HIST1H1B	0.808099	0.765885	0.890831	1.03709	1.51984	0.406503	1.77705	1.14322	0.738746	0.912734
[K].akkPAGATPkk.[A]	P16401	HIST1H1B	0.961278	1.22107	1.40061	1.22255	2.25921	0.405298	0.922463	0.603504	0.45455	0.549462
[A].aGAGAAkR.[K]	P16401	HIST1H1B	0.425518	0.716697	1.14349	0.718254	0.892355	0.710933	1.55253	1.35026	1.06059	1.42937
[M].pAGPVqAVPPPPPVPTEPkqPTEEEASSk.[E]	Q15459	SF3A1	0.872887	0.683652	0.842358	1.04895	1.12757	0.74832	1.44642	1.16981	1.00678	1.05325
[K].eDSAPSkPVVGIIYPPPEVR.[N]	Q15459	SF3A1	0.912933	0.731469	0.698335	1.12255	1.14612	0.781534	1.35937	1.11705	0.98263	1.14802
[Q].eQIEAIHkAk.[G]	Q15459	SF3A1	0.885988	0.720212	0.791935	1.10672	1.13618	0.770869	1.39196	1.12876	0.969774	1.09761
[Q].aVPPPPPVPTEPkqPTEEEASSk.[E]	Q15459	SF3A1	0.782338	0.685878	0.690702	0.926803	0.901524	0.763943	1.66495	1.36392	1.0191	1.20084
[F].gVEETAIGk.[K]	Q15459	SF3A1	0.693628	0.630543	0.696459	0.951139	1.00869	0.631209	1.84112	1.33593	1.02094	1.19034
[A].gEGPGGADDEGPVR.[R]	Q96C90	PPP1R14B	1.31654	0.628318	1.00367	1.53043	1.11762	0.999161	0.971645	0.75836	0.758541	0.915728
[L].aAPAPGPGSGGPGPR.[V]	Q96C90	PPP1R14B	0.7594	0.709823	0.668022	1.00359	1.05198	0.86435	1.44607	1.26025	1.05463	1.18188
[Y].fQSPPGAAGEGPGGADDEGPVR.[R]	Q96C90	PPP1R14B	0.697684	0.562966	0.589787	0.814281	1.01974	0.769196	1.74652	1.42135	1.07335	1.30512
[A].lAAPAPGPGSGGPGPR.[V]	Q96C90	PPP1R14B	0.765728	0.592136	0.654952	0.955345	0.959613	0.771096	1.65928	1.38724	1.01859	1.23601
[Y].fQSPPGAAGEGPGGADDEGPVRR.[Q]	Q96C90	PPP1R14B	0.568229	0.564729	0.531228	0.844646	0.925601	0.765574	1.82156	1.4023	1.15494	1.42118
[A].gEGPGGADDEGPVRR.[Q]	Q96C90	PPP1R14B	0.679564	0.518055	0.566101	0.814422	0.894758	0.738894	2.01595	1.41164	1.02351	1.33712
[A].aPAPGPGSGGPGPR.[V]	Q96C90	PPP1R14B	0.81456	0.523648	0.541033	0.745159	0.734306	0.868237	1.72141	1.44361	1.14281	1.46522
[P].gPGSGGPGPR.[V]	Q96C90	PPP1R14B	0.343856	0.3225	0.347039	0.49181	0.535218	0.844591	2.39702	1.79564	1.25375	1.66857
[E].sAAPAAGEEPSkEEGEPkk.[T]	P80723	BASP1	0.877566	1.21619	0.994621	1.23039	1.87206	0.388459	1.19822	0.881135	0.600143	0.74121
[A].kEEAPkAEPEkTEGAAEAk.[A]	P80723	BASP1	0.44279	0.721553	0.512237	0.737439	1.06603	0.668638	1.81511	1.48731	1.18483	1.36406
[K].eEAPkAEPEkTEGAAEAk.[A]	P80723	BASP1	0.415944	0.706847	0.653861	0.713864	1.1574	0.66593	1.76936	1.50953	1.11436	1.2929
[E].ekEGEkDAAAAk.[E]	P80723	BASP1	0.801682	0.797828	0.713194	1.00307	1.06317	0.656439	1.74159	1.20858	0.9448	1.06963
[K].aEPPkAPEqEQAAPGPAAGGEAPkAA.[E]	P80723	BASP1	0.729372	0.582343	0.465425	0.788732	0.817016	0.759071	1.9001	1.52327	1.10668	1.328
[K].aEPPkAPEqEqAAPGPAAGGEAP.[K]	P80723	BASP1	0.798676	0.531184	0.662405	0.886183	0.988412	0.602324	2.04421	1.38173	0.885471	1.2194
[A].kEEAPkAEPEk.[T]	P80723	BASP1	0.599539	0.638006	0.553647	0.866746	0.962815	0.616901	2.12338	1.42327	1.00119	1.2145
[A].aEPAEAkEGkEkPDqDAEGk.[A]	P80723	BASP1	1.18948	1.07332	1.10176	1.15768	1.33915	0.694586	1.12794	0.816627	0.744538	0.754911
[K].eEAPkAEPEkT.[E]	P80723	BASP1	0.477232	0.421785	0.456019	0.616569	0.827023	0.603498	2.60631	1.58276	1.13292	1.27588
[A].mEPGnGSLDLGGDSAGR.[S]	Q00839	HNRNPU	0.733998	0.751379	0.76669	1.01583	1.15111	0.824708	1.33899	1.23404	1.0266	1.15665
[K].aVVVcPkDEDYkqR.[T]	Q00839	HNRNPU	1.12498	0.710806	0.792572	1.15138	0.913478	0.605439	1.70303	1.1418	0.838159	1.01836
[Y].fEYIEENkYSR.[A]	Q00839	HNRNPU	0.615406	0.746484	0.853598	0.873514	1.06974	0.69357	1.56398	1.34519	1.01219	1.22633
[K].dLPEHAVLk.[M]	Q00839	HNRNPU	1.31213	0.941024	1.13363	1.25793	1.14469	0.609248	1.16177	0.953539	0.703847	0.782185
[F].aVTVAPPGAR.[Q]	Q00839	HNRNPU	0.780001	0.719688	0.784138	0.924502	1.10772	0.753232	1.4584	1.31141	1.03037	1.13055
[M].ePGNGSLDLGGDSAGR.[S]	Q00839	HNRNPU	0.519737	0.465053	0.438855	0.716431	0.716289	0.693727	2.20332	1.64282	1.15422	1.44955
[A].vVVcPkDEDYkqR.[T]	Q00839	HNRNPU	0.695109	0.452381	0.529667	0.683107	0.758047	0.63963	2.03733	1.49487	1.21463	1.49523
[L].dLGGDSAGR.[S]	Q00839	HNRNPU	0.542645	0.663544	0.657455	0.6955	1.1464	0.565549	2.32855	1.54052	0.853031	1.00679
[E].gkDLPEHAVLk.[M]	Q00839	HNRNPU	1.14347	0.817521	0.972226	1.18112	1.06654	0.60057	1.40468	1.01299	0.799928	1.00095
[Y].iEENkYSR.[A]	Q00839	HNRNPU	0.562473	0.504139	0.601422	0.718725	0.850946	0.773505	2.01452	1.56009	1.05113	1.36305
[Q].qQqPqqQR.[G]	Q00839	HNRNPU	1.00499	0.905524	0.760186	1.05736	1.17122	0.840101	1.15644	1.06932	0.90868	1.12618
[A].vTVAPPGAR.[Q]	Q00839	HNRNPU	0.66285	0.602106	0.686682	0.837405	1.03398	0.677838	1.79543	1.4382	1.0058	1.2597
[V].tVAPPGAR.[Q]	Q00839	HNRNPU	0.631077	0.35246	0.535506	0.678698	0.719469	0.7826	2.14737	1.60254	1.23681	1.31347
[K].gNFTLPEVA.[E]	Q00839	HNRNPU	0.81198	0.64031	0.714665	1.01871	1.08734	0.722719	1.51104	1.27291	0.909558	1.31077
[K].gNFTLPEVAE.[C]	Q00839	HNRNPU	0.771628	0.686543	0.666439	0.903138	1.12822	0.61779	1.69078	1.46498	0.973655	1.09682
[MR].iGLPGAGk.[T]	Q00839	HNRNPU	0.895078	0.684572	0.672819	1.05715	1.11549	0.740078	1.59857	1.22334	0.913257	1.09965
[L].kLDkENALDR.[A]	P09493-10	TPM1	0.470874	0.408892	0.370402	0.527742	0.58826	1.02198	1.9541	1.62696	1.36394	1.66685
[K].eAkHIAEDADR.[K]	P09493-10	TPM1	0.945554	1.06613	0.821513	1.22707	1.23716	0.687355	1.26488	0.991763	0.796529	0.962043
[L].sDkLkEAETR.[A]	P09493-10	TPM1	1.32468	0.953345	0.825792	1.16452	1.20854	0.72615	1.14459	0.957037	0.784461	0.910883
[L].vIIESDLER.[A]	P09493-10	TPM1	0.968805	1.25035	0.895284	1.24221	1.32407	0.632552	1.05979	0.945405	0.741932	0.939602
[A].kHIAEDADR.[K]	P09493-10	TPM1	1.18265	1.15873	0.931037	1.2771	1.35881	0.729305	1.01923	0.899451	0.701915	0.741783
[A].eADkkAAEDR.[S]	P09493-10	TPM1	1.22463	1.0539	0.97897	1.23273	1.32837	0.63381	1.12757	0.88918	0.71413	0.816719
[RA].qLEEqLR.[ID]	P09493-10	TPM1	0.770253	0.620145	0.631064	0.85965	0.971728	0.732483	1.72857	1.40474	1.01745	1.26391
[K].iANPVEGSSGR.[Q]	Q15365	PCBP1	1.17365	0.820607	0.761583	1.39572	1.16908	0.563265	1.35682	1.04167	0.759796	0.957817
[A].aSRPPVTLR.[L]	Q15365	PCBP1	0.866267	0.698259	0.736712	1.07649	1.18152	0.625424	1.52473	1.21827	0.946624	1.1257
[M].tIPYQPmPASSPVIcAGGQDR.[C]	Q15365	PCBP1	0.631914	0.709751	0.723815	0.862328	1.15082	0.729292	1.50908	1.37728	1.02133	1.28439
[A].sSPVIcAGGqDR.[C]	Q15365	PCBP1	0.721849	0.627971	0.72564	0.76691	1.07385	0.662751	1.74932	1.43609	1.04695	1.18867
[G].iDSSSPEVk.[G]	Q15365	PCBP1	1.0991	0.728912	0.708721	1.12118	1.05367	0.702065	1.41426	1.2051	0.885548	1.08144
[F].aGIDSSSPEVk.[G]	Q15365	PCBP1	1.1737	0.784989	0.912634	1.25085	1.27537	0.675134	1.19609	0.969497	0.807659	0.954076
[N].sTAASRPPVTLR.[L]	Q15365	PCBP1	1.13375	0.741453	0.79702	1.20872	1.1524	0.705521	1.28142	1.07336	0.848282	1.05806
[S].tAASRPPVTLR.[L]	Q15365	PCBP1	0.805498	0.589869	0.7155	0.883509	1.07553	0.588386	1.74318	1.41243	0.999703	1.18639
[T].aASRPPVTLR.[L]	Q15365	PCBP1	0.897382	0.745211	0.83738	0.990923	1.24569	0.746402	1.47419	1.1926	0.827647	1.04258
[A].nPVEGSSGR.[Q]	Q15365	PCBP1	0.990096	0.555596	0.571977	1.00039	0.883978	0.551784	1.88664	1.43919	0.945657	1.17469
[N].iSEGNcPER.[I]	Q15365	PCBP1	1.21988	0.86413	0.926443	1.21116	1.35867	0.695702	1.04855	0.958447	0.787323	0.929698
[AV].sRPPVTLR.[L]	Q15365	PCBP1	1.16983	0.794518	0.901695	1.3551	1.38452	0.57424	1.03114	1.0129	0.817073	0.958973
[I].sEGNcPER.[I]	Q15365	PCBP1	0.735817	0.571732	0.630552	0.87024	0.991321	0.762925	1.71493	1.36802	1.06815	1.28631
[Q].hTISPLDLAk.[L]	Q15365	PCBP1	0.980447	0.759427	0.927988	1.16623	1.27936	0.673081	1.20313	1.15025	0.865033	0.995058
[L].vILEGELER.[SA]	P67936	TPM4	0.960124	0.626214	0.709476	1.0041	0.897317	1.04331	1.45242	1.1363	1.01501	1.15573
[N].sLEAVkR.[K]	P67936	TPM4	1.4335	0.930309	0.877423	1.2709	1.17425	0.729171	1.22262	0.870678	0.718653	0.772491
[S].vIDPVPAPVGDSHVDGAAk.[S]	Q13177	PAK2	0.574672	0.731303	0.672087	0.83612	1.1851	0.609719	1.71524	1.32774	1.05799	1.29003
[K].gTEAPAVVTEEEDDDEETAPPVIAPR.[P]	Q13177	PAK2	0.753107	0.64887	0.643199	0.883798	1.12115	0.704421	1.69265	1.34069	0.994955	1.21717
[R].sVIDPVPAPVGDSHVDGAAk.[S]	Q13177	PAK2	0.547489	0.884355	0.754281	0.960411	1.29341	0.705151	1.3392	1.26728	0.99662	1.25181
[R].sVIDPVPAPVGDSHVDGA.[A]	Q13177	PAK2	0.719815	0.666417	0.619433	0.909235	0.955166	0.810918	1.55975	1.34144	1.10422	1.31361
[L].sFTPPEkDGFPSGTPALNAk.[G]	Q13177	PAK2	0.861464	0.76035	0.79618	1.00425	1.21688	0.766903	1.34897	1.17928	0.904239	1.16147
[S].lkPLPSVPEEkkPR.[H]	Q13177	PAK2	1.14649	0.75121	0.638129	1.32873	1.01396	0.588124	1.37556	1.16417	0.907775	1.08585
[N].hSLkPLPSVPEEkkPR.[H]	Q13177	PAK2	0.982622	0.700891	0.850515	1.11603	1.14385	0.664839	1.28022	1.0744	0.964581	1.22205
[N].gTPELqNPEkLSPIFR.[D]	Q13177	PAK2	1.08483	0.734877	0.782405	1.3104	1.14005	0.756704	1.2367	1.07642	0.774891	1.10272
[R].sVIDPVPAPVGDS.[H]	Q13177	PAK2	0.788689	0.613905	0.668192	0.906512	1.02474	0.707215	1.67151	1.38131	1.01319	1.22473
[R].sVIDPVPAPVG.[D]	Q13177	PAK2	0.909672	0.689986	0.866025	1.17252	1.23255	0.69382	1.44099	1.12075	0.896656	0.977025
[M].vVPGLDGAQIPR.[D]	P49327	FASN	0.811212	0.872249	0.852153	1.20471	1.22555	0.681505	1.25492	1.0851	0.872977	1.13962
[H].sPNPEIPALLDGR.[L]	P49327	FASN	0.859116	0.583387	0.652053	0.945319	1.03872	0.767206	1.33056	1.3175	1.10069	1.40544
[E].aIVDGGINPDSLR.[G]	P49327	FASN	1.57949	0.943115	0.917138	1.78095	1.10694	0.613688	0.880546	0.731628	0.658863	0.787641
[H].fHSPNPEIPALLDGR.[L]	P49327	FASN	0.802653	0.672532	0.759187	0.9712	1.10114	0.890342	1.4768	1.10278	1.07713	1.14623
[H].gTGTkVGDPqELnGITR.[A]	P49327	FASN	1.24668	1.00575	0.971733	1.21991	1.50591	0.70116	0.94456	0.886114	0.677102	0.841078
[N].dTIVSGTLPqR.[M]	P49327	FASN	0.794954	0.720897	0.6823	1.12698	0.998439	0.662498	1.52727	1.27319	0.986933	1.22654
[Q].vVDqPLPVR.[G]	P49327	FASN	1.36244	1.067	1.09002	1.68028	1.31684	0.56325	0.730803	0.747039	0.637049	0.805272
[L].aEEPEAVLk.[G]	P49327	FASN	1.21491	0.61591	0.702585	1.11849	0.91502	0.748308	1.408	1.17544	0.943222	1.15812
[L].qVVDqPLPVR.[G]	P49327	FASN	1.39012	0.821055	1.09668	1.40254	1.64206	0.48146	1.03167	0.799298	0.588862	0.746255
[T].gTkVGDPqELnGITR.[A]	P49327	FASN	0.970744	0.881909	0.904527	1.13474	1.17139	0.659052	1.27205	1.10669	0.850152	1.04874
[D].gGINPDSLR.[G]	P49327	FASN	1.01729	0.629755	0.687261	0.979639	0.983215	0.86155	1.4726	1.20702	0.992837	1.16883
[Q].vLAEEPEAVLk.[G]	P49327	FASN	1.40344	0.741001	0.781671	1.24635	0.923494	0.733536	1.23837	1.01948	0.867342	1.04531
[F].gPTEEPqNIPkR.[T]	Q9H910-3	JPT2	0.960131	0.681902	0.735132	1.17917	1.13747	0.820422	1.3548	1.07003	0.943729	1.11721
[R].sIPAGAEPGEkGSAR.[K]	Q9H910-3	JPT2	0.566653	0.425396	0.533722	0.629399	0.890909	0.943656	1.68396	1.47827	1.30921	1.53883
[R].kAGPAkEqEPmPTVDSHEPR.[L]	Q9H910-3	JPT2	0.69622	0.516974	0.621216	0.887751	1.0208	0.783882	1.68643	1.39356	1.07523	1.31794
[N].iFGPTEEPqnIPkR.[T]	Q9H910-3	JPT2	0.695363	0.649066	0.68741	0.930801	1.24184	0.751379	1.53448	1.26771	1.02694	1.21501
[S].gIFDESTPVQTR.[Q]	Q9H910-3	JPT2	1.09074	0.755005	0.795332	1.16637	1.21879	0.760906	1.2303	1.06296	0.869723	1.04987
[G].aEPGEkGSAR.[K]	Q9H910-3	JPT2	1.58979	1.14659	1.13048	1.50195	1.85597	0.503084	0.691708	0.593293	0.451689	0.535446
[T].eEPQNIPkR.[T]	Q9H910-3	JPT2	1.10578	0.633464	0.766375	1.13524	1.11502	0.848235	1.37483	1.03047	0.935307	1.05528
[R].qHLNPPGGkTS.[D]	Q9H910-3	JPT2	0.937316	0.684487	0.787695	1.21327	1.1384	0.839498	1.32297	1.13239	0.874533	1.06944
[F].qVPDSEGGR.[A]	Q9H910-3	JPT2	1.10878	0.709493	0.715801	1.11632	1.14314	0.634803	1.51858	1.16403	0.848618	1.04043
[Q].gDEGDGEEGLqR.[T]	Q8IVF2-1	AHNAK2	0.743637	0.645188	0.700518	1.04609	1.0679	0.688488	1.6755	1.27117	0.89988	1.26163
[LV].dVkLPEGPVPEGAGLk.[G]	Q8IVF2-1	AHNAK2	0.467179	0.318091	0.365036	0.496287	0.666934	1.00064	2.20205	1.59352	1.35893	1.53134
[D].vkLPEGPVPEGAGLk.[G]	Q8IVF2-1	AHNAK2	0.623825	0.515348	0.534463	0.668395	0.727165	0.891056	1.94889	1.52156	1.18637	1.38293
[D].vkLPEGPVPEGASLk.[G]	Q8IVF2-1	AHNAK2	0.495316	0.449751	0.440938	0.679388	0.760894	0.719159	2.12407	1.60801	1.1752	1.54728
[D].vkLPEGPVPEGAGPk.[V]	Q8IVF2-1	AHNAK2	0.530006	0.452005	0.498265	0.688269	0.734385	0.849635	2.07254	1.49093	1.21141	1.47255
[E].vSqPEADLPLPkHDLSTEGDSR.[G]	Q8IVF2-1	AHNAK2	0.605737	0.427412	0.541074	0.756282	0.78257	0.799865	2.2166	1.4661	1.13313	1.27123
[ED].gDLSLADkDVTAk.[D]	Q8IVF2-1	AHNAK2	0.549508	0.435089	0.441472	0.526477	0.676635	1.29826	1.73627	1.5596	1.3911	1.38559
[K].mPSFGVSAPGkSIEAS.[VL]	Q8IVF2-1	AHNAK2	0.669384	0.580995	0.528014	0.873977	0.911306	0.6771	2.00902	1.36411	1.0795	1.30659
[MV].eVDVqAPR.[A]	Q8IVF2-1	AHNAK2	0.533064	0.442553	0.50356	0.644152	0.835924	0.668302	2.22011	1.58973	1.12571	1.43689
[V].eVDVEAPR.[A]	Q8IVF2-1	AHNAK2	0.564184	0.49908	0.538057	0.704902	0.921306	0.619033	2.18333	1.54908	1.06938	1.35164
[E].vDVEAPGAk.[L]	Q8IVF2-1	AHNAK2	0.645043	0.512642	0.601179	0.774025	0.905651	0.807769	1.905	1.39605	1.13439	1.31825
[K].lPEGPLPEGA.[SG]	Q8IVF2-1	AHNAK2	0.832309	0.562062	0.665633	0.868317	0.954561	0.833708	1.80398	1.31103	0.974604	1.19379
[S].lADkDVTAk.[D]	Q8IVF2-1	AHNAK2	0.639024	0.435641	0.523383	0.728576	0.800215	1.25486	1.685	1.32459	1.23573	1.37299
[T].vEEPVQqPSVVDR.[V]	O60664-1	PLIN3	0.563261	0.49717	0.505849	0.740876	0.843409	0.69359	1.9787	1.5602	1.14611	1.47083
[Q].vTVEEPVqqPSVVDR.[V]	O60664-1	PLIN3	0.618036	0.5264	0.583608	0.774577	0.939255	0.795608	1.81916	1.46625	1.10137	1.37574
[L].sGVDTVLGk.[S]	O60664-1	PLIN3	0.649441	0.578343	0.762321	0.930603	1.01777	0.770399	1.59429	1.39587	1.04212	1.25883
[A].aVSGAqPILSk.[L]	O60664-1	PLIN3	0.944737	0.659555	0.642547	1.00702	1.06996	0.815612	1.40245	1.23257	0.97619	1.24935
[W].lVGPFAPGITEkAPEEkk.[-]	O60664-1	PLIN3	0.556037	0.549146	0.611881	0.936383	0.84698	0.715085	1.6706	1.4846	1.07781	1.55149
[T].ekAPEEkk.[-]	O60664-1	PLIN3	0.961027	0.588714	0.73213	1.13571	0.966307	1.03882	1.24758	1.08224	1.06016	1.18731
[L].sEAVDATR.[G]	O60664-1	PLIN3	0.675078	0.606614	0.634311	0.89251	1.00128	0.741205	1.70361	1.42422	1.00647	1.3147
[S].gVDTVLGk.[S]	O60664-1	PLIN3	1.06844	0.566825	0.673871	1.08545	0.93432	1.0024	1.26639	1.13715	1.05611	1.20905
[V].fVDLEPTVIDEVR.[T]	P68363	TUBA1B	1.36822	0.997622	1.04341	1.47572	1.18104	0.627457	0.922912	0.824253	0.729075	0.830286
[N].yqPPTVVPGGDLAkVqR.[A]	P68363	TUBA1B	0.773188	0.66887	0.781711	1.01809	1.01806	0.690543	1.45286	1.27705	1.01141	1.30823
[D].lEPTVIDEVR.[T]	P68363	TUBA1B	0.878187	0.730483	0.69915	1.06386	0.980263	0.682612	1.52281	1.28148	0.972718	1.18844
[F].vDLEPTVIDEVR.[T]	P68363	TUBA1B	0.94917	0.800166	0.797353	1.07366	1.14714	0.705616	1.46798	1.13381	0.890445	1.03465
[V].dNEAIYDIcR.[R]	P68363	TUBA1B	0.666216	0.593512	1.00247	0.731591	1.11174	0.851018	1.52867	1.25466	1.03107	1.22905
[F].fSETGAGkHVPR.[A]	P68363	TUBA1B	0.812678	0.816291	0.873746	1.10441	1.23004	0.670181	1.39357	1.14936	0.854803	1.09491
[F].sETGAGkHVPR.[A]	P68363	TUBA1B	0.622768	0.557807	0.62192	0.721221	0.906403	0.771616	1.74929	1.51639	1.11457	1.41802
[K].tIGGGDDSFNTF.[F]	P68363	TUBA1B	1.00955	0.728463	0.836805	1.03444	1.04138	0.744339	1.42702	1.17174	0.959772	1.04649
[D].sVEGEGEEEGEEY.[-]	P68363	TUBA1B	0.892522	0.696985	0.626317	1.18596	1.0451	0.731512	1.38903	1.28733	0.917124	1.22812
[F].fSETGAGk.[H]	P68363	TUBA1B	2.24869	1.11807	1.2607	1.85422	1.26063	0.500585	0.483445	0.411268	0.411452	0.450936
[N].yqPPTVVPGGDLAk.[V]	P68363	TUBA1B	1.0424	0.731063	0.775451	1.0944	1.2246	0.640361	1.42115	1.17938	0.840074	1.05111
[D].sADGEDEGEEY.[-]	Q9BQE3	TUBA1C	0.775784	0.655273	0.635109	1.02224	0.982387	0.769775	1.53487	1.31277	0.998327	1.31346
[R].qVLLSAAEAAEVILR.[V]	P78371-1	CCT2	0.862094	0.776322	0.695566	1.02454	1.1204	0.753585	1.08427	1.26352	1.05291	1.36678
[R].mLPTIIADNAGYDSADLVAqLR.[A]	P78371-1	CCT2	0.702431	0.882443	0.675364	0.894899	1.12656	0.642694	1.17335	1.3648	1.21693	1.32053
[S].aVDHGSDEVkFR.[Q]	P78371-1	CCT2	0.860905	0.610454	0.819376	0.939192	1.22674	0.617024	1.63297	1.21407	0.908656	1.17061
[A].vDHGSDEVkFR.[Q]	P78371-1	CCT2	0.85599	0.630495	0.74655	1.03867	1.14575	0.610699	1.48411	1.31109	0.945121	1.23153
[L].knIGVDNPAAk.[V]	P78371-1	CCT2	1.66446	0.730846	1.03028	1.25673	1.2641	0.692139	1.01502	0.862584	0.716104	0.767725
[K].nIGVDNPAAk.[V]	P78371-1	CCT2	0.709153	0.531281	0.504341	0.872357	0.825912	0.809792	1.80146	1.47579	1.14177	1.32814
[D].nIIkAAPR.[K]	P78371-1	CCT2	1.19883	0.596604	0.718041	0.950948	1.08641	0.829587	1.2635	1.20749	0.978683	1.16992
[A].eAAEVILR.[V]	P78371-1	CCT2	0.822989	0.670514	0.79804	0.927486	1.26711	0.685121	1.50259	1.24531	0.902832	1.17801
[L].dkkIGVNqPkR.[I]	P78371-1	CCT2	0.98773	0.56158	0.669899	0.854441	0.968351	0.717847	1.58931	1.2888	1.06789	1.29415
[F].kAGADEER.[A]	P78371-1	CCT2	0.991402	0.829405	0.766684	1.16363	1.34766	0.837241	0.98587	1.03414	0.957156	1.08681
[Q].qILDEAER.[S]	P78371-1	CCT2	0.784126	0.584757	0.624648	0.803064	1.04757	0.617583	1.906	1.40306	1.05837	1.17083
[Q].aVSEDAGGNEGR.[A]	P55884-2	EIF3B	1.13283	0.973115	0.922195	1.5582	1.41212	0.635135	0.788345	0.859569	0.746835	0.971655
[V].sEDAGGnEGR.[A]	P55884-2	EIF3B	1.12302	0.85698	0.85788	1.43058	1.36985	0.643433	0.939339	0.926925	0.808993	1.043
[H].aEPPVPAQGEAPGEqAR.[D]	P55884-2	EIF3B	0.790268	0.563919	0.619473	0.892851	0.98496	0.701173	1.78304	1.37853	1.02199	1.2638
[N].vAVPEAAEER.[A]	P55884-2	EIF3B	0.566949	0.57532	0.586951	0.666521	0.893468	0.491362	2.47381	1.60794	0.953493	1.18419
[A].sGPSESPSPPAAEELPGSHAEPPVPAqGEAPGEqAR.[D]	P55884-2	EIF3B	0.523488	0.444861	0.480852	0.715689	0.837721	0.690142	2.01587	1.58548	1.2177	1.48819
[V].aVPEAAEER.[A]	P55884-2	EIF3B	0.827293	0.733497	0.694426	1.03352	1.08175	0.747001	1.4242	1.27815	0.967192	1.21297
[L].kLDkENAIDR.[A]	P07951-2	TPM2	0.470874	0.408892	0.370402	0.527742	0.58826	1.02198	1.9541	1.62696	1.36394	1.66685
[K].eAkHIAEDSDR.[K]	P07951-2	TPM2	0.438243	0.341448	0.47248	0.582565	0.627446	1.1857	1.82542	1.52262	1.39645	1.60763
[RH].qLEEELR.[TQ]	P07951-2	TPM2	0.770253	0.620145	0.631064	0.85965	0.971728	0.732483	1.72857	1.40474	1.01745	1.26391
[A].eADkkQAEDR.[C]	P07951-2	TPM2	0.375275	0.303913	0.411764	0.420932	0.577794	1.34587	1.88686	1.47064	1.47789	1.72906
[A].kHIAEDSDR.[K]	P07951-2	TPM2	0.439729	0.385245	0.451504	0.579479	0.71749	0.954853	2.12133	1.58025	1.2827	1.48742
[Q].rNDDDEEEAAR.[E]	Q05682-1	CALD1	0.239839	0.241165	0.252832	0.382179	0.446873	1.3895	1.90744	1.94691	1.46323	1.73003
[D].tkEAEGAPqVEAGkR.[L]	Q05682-1	CALD1	0.881219	0.582765	0.654319	0.937905	1.06976	0.67007	1.58481	1.25802	1.09172	1.2694
[S].aIEGTkSAkPTkPAASDLPVPAEGVR.[N]	Q05682-1	CALD1	0.430704	0.403776	0.363656	0.555061	0.548878	1.08369	1.59358	1.76462	1.51414	1.74189
[S].akPTkPAASDLPVPAEGVR.[N]	Q05682-1	CALD1	0.577597	0.592609	0.554078	0.657058	0.835793	1.10839	1.52267	1.48886	1.1658	1.49715
[S].vDTkEAEGAPqVEAGkR.[L]	Q05682-1	CALD1	0.227038	0.204242	0.216688	0.268708	0.406878	1.22399	1.98629	2.04555	1.60545	1.81517
[K].sAkPTkPAASDLPVPAEGVR.[N]	Q05682-1	CALD1	0.480795	0.27173	0.306568	0.472601	0.554217	0.635824	2.65971	1.94891	1.25104	1.4186
[T].kSAkPTkPAASDLPVPAEGVR.[N]	Q05682-1	CALD1	0.796224	0.513724	0.621785	0.995245	0.89875	0.795586	1.61225	1.28755	1.12128	1.3576
[S].dLPVPAEGVR.[N]	Q05682-1	CALD1	0.730804	0.675605	0.644093	0.838274	1.04739	0.885923	1.50092	1.31275	1.07349	1.29075
[K].vcLEITEDGGDSIEVPGAR.[I]	P36952-1	SERPINB5	0.426764	0.460652	0.356734	0.702703	0.848655	0.927346	1.66157	1.52803	1.35629	1.73126
[C].lEITEDGGDSIEVPGAR.[I]	P36952-1	SERPINB5	0.543772	0.494767	0.473243	0.668935	0.737051	1.13703	1.57902	1.51448	1.3374	1.51429
[K].sLNLSTEFISSTk.[R]	P36952-1	SERPINB5	0.34002	0.357734	0.376321	0.477477	0.559105	1.09608	1.6328	1.76849	1.55299	1.83898
[T].eDGGDSIEVPGAR.[I]	P36952-1	SERPINB5	0.302381	0.217042	0.245282	0.341978	0.390166	1.77608	1.63022	1.69315	1.63988	1.76382
[E].iTEDGGDSIEVPGAR.[I]	P36952-1	SERPINB5	0.325385	0.298926	0.30111	0.468027	0.441856	0.870493	2.02266	1.88045	1.45584	1.93525
[K].gDTANEIGqVL.[H]	P36952-1	SERPINB5	0.688867	0.532509	0.566049	0.756268	0.818217	0.973975	1.63649	1.43788	1.20708	1.38267
[L].sLAqVGAk.[G]	P36952-1	SERPINB5	0.469633	0.361763	0.360126	0.572599	0.569837	1.19055	1.70355	1.618	1.44116	1.71278
[K].vkLSIPk.[F]	P36952-1	SERPINB5	0.495678	0.355454	0.404309	0.609847	0.567009	2.49955	1.25819	1.21627	1.31962	1.27406
[VE].kLSIPk.[FV]	P36952-1	SERPINB5	0.0692668	0.0504874	0.080497	0.14917	0.157093	1.74346	1.77525	1.92638	1.98118	2.06722
[C].gAPSATqPATAETQHIADQVR.[S]	P04080	CSTB	0.704181	0.656517	0.618788	0.978035	1.03696	0.831054	1.48731	1.27046	1.0935	1.32319
[Q].kAEGAGDAk.[-]	P05204	HMGN2	0.630891	1.05086	1.08229	1.24211	2.02107	0.459569	1.24889	0.829375	0.656966	0.777986
[L].sAkPAPPkPEPkPk.[K]	P05204	HMGN2	0.43618	0.427561	0.418896	0.587858	0.780381	0.609174	2.4832	1.79672	1.10941	1.35062
[A].kPAPPkPEPkPk.[K]	P05204	HMGN2	0.537611	0.523684	0.348437	0.650143	0.728301	0.625211	2.17737	1.73632	1.34343	1.32949
[S].akPAPPkPEPkPk.[K]	P05204	HMGN2	0.731698	0.639782	0.669905	0.878715	1.36678	0.509659	1.91745	1.29011	0.977639	1.01825
[N].nPAEnGDAk.[T]	P05204	HMGN2	0.913505	0.754321	0.686369	0.9506	1.12189	0.577404	1.79651	1.25134	0.885796	1.06227
[D].aGkEGNNPAEnGDAk.[T]	P05204	HMGN2	1.28305	0.732233	0.82269	1.22933	1.31456	0.529113	1.50001	0.988273	0.68855	0.91218
[P].aPPkPEPkPk.[K]	P05204	HMGN2	0.682513	0.770132	0.544506	0.913961	0.93393	0.685043	1.69483	1.43162	1.09614	1.24733
[R].lSAkPAPPkPEPkPk.[K]	P05204	HMGN2	0.409934	0.266666	0.358705	0.481639	0.598522	0.63148	2.56726	1.8931	1.38191	1.41079
[S].akPAPPkPEPkPkk.[A]	P05204	HMGN2	1.02891	0.959617	1.12566	1.21562	1.71518	0.479958	1.20733	0.859804	0.633999	0.773914
[P].aPPkPEPkPkk.[A]	P05204	HMGN2	1.06631	1.33255	0.873248	1.37593	1.51464	0.531757	1.05149	0.826715	0.674637	0.75273
[K].aEGAGDAk.[-]	P05204	HMGN2	1.50518	1.7423	0.987512	1.8868	1.83706	0.269879	0.650502	0.431794	0.301035	0.387931
[K].gDkAkVk.[D]	P05204	HMGN2	2.2758	0.647794	0.802628	1.16369	0.924083	0.516033	1.36444	0.904049	0.615045	0.786426
[K].gDkAkVkDEPqR.[R]	P05204	HMGN2	1.5214	0.926206	1.14918	1.52275	1.63268	0.502838	0.860611	0.649914	0.560481	0.673925
[L].tDDqVSGPPSAPAEDR.[S]	Q92734-1	TFG	0.890563	0.612309	0.721712	0.924699	1.12854	0.687094	1.65818	1.24315	1.00237	1.13139
[F].gLTDDqVSGPPSAPAEDR.[S]	Q92734-1	TFG	0.723945	0.603018	0.660598	0.943302	1.06856	0.773292	1.6128	1.3457	0.983238	1.28555
[M].tPPPSGPNPYAR.[N]	Q92734-1	TFG	0.717762	0.476775	0.54416	0.710152	0.823853	0.798897	1.82364	1.5526	1.1447	1.40745
[T].mTPPPSGPNPYAR.[N]	Q92734-1	TFG	0.627816	0.660932	0.600601	0.794274	0.917963	0.914478	1.61268	1.45065	1.1201	1.3005
[Y].ekPLAEGPqVTGPIEVPAAR.[A]	P52943-2	CRIP2	1.18562	0.980143	1.01852	1.54915	1.31319	0.544645	1.03364	0.851731	0.673342	0.850016
[Y].iYEkPLAEGPqVTGPIEVPAAR.[A]	P52943-2	CRIP2	1.05395	1.19751	1.12822	1.48158	1.59962	0.474445	0.990099	0.772413	0.591436	0.710732
[F].tGEPNTcPR.[C]	P52943-2	CRIP2	0.999513	0.753907	0.910058	1.17765	1.25199	0.633884	1.38371	1.07733	0.845463	0.966501
[T].eTqEkNPLPSk.[E]	P62328	TMSB4X	1.5811	0.806671	1.21026	1.43455	1.45537	0.468727	1.02831	0.717977	0.589233	0.707807
[T].qEkNPLPSk.[E]	P62328	TMSB4X	1.02108	1.55326	1.27728	1.39552	2.17069	0.387284	0.758512	0.550015	0.398429	0.487936
[E].tQEkNPLPSkETIEQEk.[Q]	P62328	TMSB4X	1.25684	1.32004	1.01175	1.40232	2.02635	0.402985	0.993236	0.595782	0.420039	0.57066
[K].tETqEkNPLPSkETIEqEkQ.[A]	P62328	TMSB4X	0.544656	0.459894	0.672276	0.722726	1.07967	0.461021	2.58093	1.49358	0.961136	1.02412
[Q].ekNPLPSkETIEQEk.[Q]	P62328	TMSB4X	1.07851	1.0927	0.910814	1.25333	1.47404	0.630395	1.13595	0.875748	0.735031	0.813482
[E].tQEkNPLPSk.[E]	P62328	TMSB4X	0.990572	1.23809	1.25107	1.35331	2.42077	0.384743	0.778262	0.606995	0.453274	0.522906
[K].tETqEkNPLPSk.[E]	P62328	TMSB4X	0.685686	0.808657	0.991175	0.942477	1.46073	0.518683	1.78126	1.14913	0.75663	0.905561
[T].eTqEkNPLPSkETIEqEk.[Q]	P62328	TMSB4X	1.32694	0.87869	1.37252	1.51324	2.36611	0.322894	0.903817	0.529423	0.363426	0.422943
[Q].ekNPLPSk.[E]	P62328	TMSB4X	1.30643	1.3574	1.1977	1.45234	2.24963	0.417909	0.612441	0.549269	0.394595	0.462297
[R].sIQLDGLVWGASk.[L]	P29692-2	EEF1D	0.85731	0.695411	0.692368	0.99177	1.01382	0.908831	1.04901	1.23662	1.19668	1.35818
[S].sGTSGDHGELVVR.[I]	P29692-2	EEF1D	0.727242	0.54122	0.659868	0.85767	0.943694	0.725416	1.84113	1.39561	1.06531	1.24285
[S].gTSGDHGELVVR.[I]	P29692-2	EEF1D	0.876488	0.616488	0.674777	1.11968	0.995256	0.854339	1.48088	1.20283	0.970114	1.20915
[L].aGSSGPGASSGTSGDHGELVVR.[I]	P29692-2	EEF1D	0.783087	0.834417	0.847718	1.23654	1.43793	0.659804	1.27329	1.03052	0.879046	1.01765
[S].lAGSSGPGASSGTSGDHGELVVR.[I]	P29692-2	EEF1D	0.875172	0.749581	0.722569	1.17552	1.00244	0.738973	1.47237	1.17684	0.9222	1.16434
[K].kPALVAkS.[S]	P29692-2	EEF1D	0.559248	0.403659	0.482076	0.628323	0.842717	0.613652	2.64394	1.54575	1.03911	1.24153
[R].qEnGASVIL.[R]	P29692-2	EEF1D	0.752689	0.641345	0.669404	0.871596	1.04875	0.720221	1.58798	1.29772	1.07387	1.33643
[Q].sLAGkHGDDLR.[R]	P05787-2	KRT8	1.11256	1.23637	1.20247	1.53926	1.9049	0.464764	0.81726	0.629797	0.510126	0.582488
[L].dMDSIIAEVk.[A]	P05787-2	KRT8	1.0414	1.51573	1.29227	1.23141	1.88718	0.468187	0.793698	0.629299	0.536367	0.604464
[L].nNkFASFIDkVR.[F]	P05787-2	KRT8	1.49198	2.15063	1.59214	1.50147	2.07817	0.202764	0.309762	0.239871	0.199685	0.233527
[R].aVVVkkIETR.[D]	P05787-2	KRT8	1.08945	1.22239	1.52695	1.8803	2.82453	0.256964	0.481304	0.273015	0.202234	0.242875
[K].aqYEDIANR.[S]	P05787-2	KRT8	1.75766	1.50485	1.56867	1.92658	2.08971	0.153857	0.355138	0.247552	0.176461	0.219511
[V].sESSDVLPk.[-]	P05787-2	KRT8	1.84464	1.29806	1.68176	1.62821	2.00766	0.222278	0.475771	0.316036	0.2398	0.285789
[R].sYTSGPGSR.[I]	P05787-2	KRT8	1.40178	1.05771	2.02412	1.81323	2.94685	0.133198	0.235023	0.14422	0.107386	0.136484
[S].eSSDVLPk.[-]	P05787-2	KRT8	2.15288	1.30969	1.42339	1.94263	2.21284	0.178082	0.255094	0.199024	0.147321	0.179058
[QL].aGkHGDDLR.[NR]	P05787-2	KRT8	1.86942	1.38231	1.60983	1.99207	2.10174	0.199872	0.262144	0.194394	0.170821	0.217389
[K].tTSGYAGGL.[S]	P05787-2	KRT8	0.626186	0.605446	0.603856	0.921558	1.14484	0.81574	1.66095	1.34305	1.10436	1.17402
[A].sFIDkVR.[F]	P05787-2	KRT8	2.89762	1.05418	1.42362	1.84171	1.63446	0.198854	0.363378	0.222447	0.164248	0.199488
[R].kLLEGEESR.[LI]	P08670	VIM	0.987574	0.802278	0.958204	1.10999	1.42448	0.61741	1.38001	1.01284	0.751547	0.955677
[L].vSESSDVLPk.[-]	P05787-2	KRT8	1.32259	0.894481	1.03566	1.21129	1.38047	0.579798	1.15059	0.902439	0.681451	0.841232
[R].tqEkEqIkTL.[N]	P05787-2	KRT8	1.36964	1.65491	1.57513	1.49345	2.11957	0.340843	0.490789	0.361723	0.26909	0.324857
[K].lVSESSDVLP.[K]	P05787-2	KRT8	0.766105	0.705417	0.761231	0.935566	1.38314	0.801171	1.36143	1.18776	0.957753	1.14043
[K].tTSGYAGGLS.[S]	P05787-2	KRT8	0.653745	0.634648	0.713067	0.821393	1.09523	0.769896	1.63022	1.37304	1.07606	1.2327
[KR].yEDEINkR.[T]	P05787-2	KRT8	1.5333	0.750079	0.902695	1.27961	1.31369	0.491178	1.3248	0.93428	0.672161	0.798212
[A].vVVkkIETR.[D]	P05787-2	KRT8	1.33411	1.49275	1.421	1.72811	2.1692	0.350552	0.480158	0.403346	0.280967	0.339807
[K].iAnPVEGSTDR.[Q]	Q15366-2	PCBP2	0.738496	0.807199	0.722618	1.01391	1.29569	0.657253	1.4677	1.23544	0.917911	1.14378
[A].qIkIANPVEGSTDR.[Q]	Q15366-2	PCBP2	0.730785	0.666183	0.713916	0.881385	1.10346	0.695402	1.60918	1.30937	1.03406	1.25625
[Q].ikIANPVEGSTDR.[Q]	Q15366-2	PCBP2	0.758301	0.751959	0.716434	0.977502	1.09582	0.6825	1.55177	1.25102	1.00882	1.20587
[Y].aIPqPDLTk.[L]	Q15366-2	PCBP2	0.93314	0.65203	0.795751	1.05462	1.14765	0.720297	1.44392	1.15352	0.925852	1.17321
[S].sEkEEDDNEkR.[Q]	Q9UKY7	CDV3	0.833312	0.739939	0.657803	0.944905	1.13131	0.908576	1.31684	1.22863	1.05947	1.17922
[Q].iSSEkEEDDnEkR.[Q]	Q9UKY7	CDV3	0.451744	0.429968	0.492508	0.571868	0.832331	0.620687	2.56858	1.67022	1.10834	1.25375
[A].sAGAAGPGAATk.[A]	Q9UKY7	CDV3	0.884169	0.719633	0.764577	1.02611	1.16697	0.770481	1.39905	1.17548	0.967757	1.12577
[M].qISSEkEEDDNEkR.[Q]	Q9UKY7	CDV3	0.540065	0.558738	0.499133	0.818983	0.937296	0.808007	1.71598	1.4991	1.21143	1.41127
[K].tAPVqAPPAPVIVT.[E]	Q9UKY7	CDV3	0.727912	0.513472	0.763047	0.941557	1.072	0.643343	1.76483	1.31675	0.991378	1.26571
[A].aGPGAATk.[A]	Q9UKY7	CDV3	0.443103	0.390786	0.391079	0.50532	0.557473	1.08544	1.74306	1.8218	1.39863	1.66331
[S].sVSFADDFVR.[S]	P50454	SERPINH1	0.757932	1.01626	0.843101	1.046	1.47667	0.70811	1.14286	1.0908	0.853943	1.06432
[F].eLDTDGNPFDqDIYGR.[E]	P50454	SERPINH1	0.686311	0.772135	0.688311	1.05695	1.18855	0.778184	1.41283	1.26554	0.938743	1.21244
[T].dGkLPEVTkDVER.[T]	P50454	SERPINH1	0.81124	0.819323	0.726185	0.964123	1.26006	0.672723	1.40704	1.27743	0.965674	1.0962
[A].aAPGTAEkLSPkAATLAER.[S]	P50454	SERPINH1	0.853193	1.00322	0.762805	1.43433	1.20555	0.750332	1.14256	1.01955	0.78731	1.04115
[Q].tTDGkLPEVTkDVER.[T]	P50454	SERPINH1	0.777824	0.802642	0.761396	0.956276	1.2513	0.682138	1.42739	1.29278	0.952261	1.096
[T].tDGkLPEVTkDVER.[T]	P50454	SERPINH1	0.965868	0.877446	0.811583	0.91237	1.19254	0.843562	1.23127	1.17112	0.94026	1.05398
[K].tQTPPVSPAPQPTEER.[L]	Q14247-2	CTTN	0.865732	0.738535	0.784425	1.09411	1.19568	0.693295	1.45992	1.1534	0.907766	1.10713
[Q].tPPVSPAPqPTEER.[L]	Q14247-2	CTTN	0.830944	0.669569	0.665147	0.951506	0.958459	0.763992	1.68937	1.29237	0.985018	1.19362
[K].tVPVEAVTSk.[T]	Q14247-2	CTTN	1.03798	0.798403	0.781086	1.19689	1.21892	0.646817	1.39493	1.07903	0.85767	0.988274
[A].aAPTAEAPPPSVVTRPEPQALPSPAIR.[A]	Q92841	DDX17	0.649642	0.526481	0.588598	0.803668	0.80973	0.711883	1.91593	1.55178	1.06722	1.37508
[T].aEAPPPSVVTRPEPqALPSPAIR.[A]	Q92841	DDX17	0.650701	0.648315	0.594225	0.851819	0.915903	0.693999	1.98789	1.3275	0.990102	1.33954
[S].qAEADqqQTR.[L]	Q9P2E9-1	RRBP1	0.536969	0.628847	0.658579	0.819174	0.830884	0.613715	2.10328	1.47278	0.9777	1.35807
[L].eSSETEEASqLkER.[L]	Q9P2E9-1	RRBP1	0.541687	0.569052	0.57403	0.708162	0.846399	0.680856	1.98708	1.62629	1.13284	1.33361
[L].eTAPkEVPmVVVPPVGAk.[G]	Q9P2E9-1	RRBP1	0.813332	0.63229	0.607149	0.979814	0.970712	0.815048	1.63308	1.28987	1.05547	1.20325
[E].aILEDEqTqR.[Q]	Q9P2E9-1	RRBP1	1.04915	0.657254	0.639019	1.0354	0.915247	0.767949	1.50804	1.24981	0.978421	1.19971
[T].eqEDAAVAk.[S]	Q9P2E9-1	RRBP1	0.877366	0.642886	0.735768	1.06227	0.833649	0.881242	1.52474	1.21572	1.01551	1.21084
[R-].mEPPASkVPEVPTAPATDAAPkR.[V]	Q9UHD8-1	SEPT9	0.905677	0.71246	0.724707	1.00903	1.00186	0.781296	1.53789	1.16979	1.02906	1.12823
[R].lGDSSGPALk.[R]	Q9UHD8-1	SEPT9	0.969802	0.785282	0.625364	0.935939	0.911629	0.797375	1.64526	1.278	0.994179	1.05717
[R].lEPkPqPPVAEATPR.[S]	Q9UHD8-1	SEPT9	0.568703	0.44491	0.485578	0.662227	0.84529	0.673774	2.0929	1.57822	1.20875	1.43964
[M].vVGqSGLGk.[S]	Q9UHD8-1	SEPT9	1.12307	0.695383	0.700162	1.10195	0.934311	0.834846	1.36842	1.14293	0.959432	1.13949
[L].gHkTPEPAPR.[R]	Q9UHD8-1	SEPT9	0.87919	0.842918	0.779666	1.01956	1.2205	0.740415	1.40902	1.16491	0.880239	1.06358
[E].eVETPNSTPPR.[R]	Q9UHD8-1	SEPT9	0.782568	0.572321	0.58718	0.943607	0.941161	0.715177	1.74998	1.35336	1.00078	1.35387
[R].lGDSSGPALkR.[S]	Q9UHD8-1	SEPT9	1.43006	0.689909	0.829541	1.1793	1.05269	0.635961	1.38297	1.10833	0.752163	0.939066
[L].gVknSEPSAR.[H]	Q9UHD8-1	SEPT9	1.0323	1.07129	0.949761	1.27356	1.65027	0.496414	1.21563	0.90878	0.592439	0.809565
[R].aVPNPVINPYqPAPPSGY.[F]	P11940-1	PABPC1	0.853469	0.720306	0.662864	0.960186	1.13662	0.82053	1.42569	1.24186	1.04148	1.137
[R].aVPNPVINPYqPAPPSG.[Y]	P11940-1	PABPC1	1.18726	0.72418	0.800959	1.11764	1.01633	0.826491	1.28625	1.03923	0.899643	1.10201
[A].sAPPqEqkqMLGER.[L]	P11940-1	PABPC1	0.738724	0.684139	0.696867	0.8809	1.08136	0.770996	1.66092	1.29314	1.00779	1.18517
[L].aSAPPQEqkqMLGER.[L]	P11940-1	PABPC1	0.854699	0.667151	0.655074	0.938878	1.13068	0.688061	1.69451	1.3032	0.925244	1.1425
[Y].vkNLDDGIDDER.[L]	P11940-1	PABPC1	1.11059	0.780702	0.764796	1.19542	1.04772	0.723335	1.34955	1.13286	0.87113	1.0239
[K].lGGSAVISLEGkPL.[-]	P23528	CFL1	0.972725	0.935112	0.741805	1.10181	1.17673	0.806275	1.01374	1.04882	1.05754	1.14545
[R].kSSTPEEVkkR.[K]	P23528	CFL1	0.69632	0.309331	0.775317	0.487519	1.04103	0.651534	2.18463	1.51402	1.10341	1.23689
[F].wAPESAPLkSk.[M]	P23528	CFL1	1.1056	0.711566	1.21743	0.716045	1.66974	0.805258	1.06895	0.96895	0.836919	0.89954
[F].vkMLPDkDcR.[Y]	P23528	CFL1	1.07516	0.567144	1.55365	0.794261	1.65616	0.615888	1.14217	0.949209	0.774002	0.872349
[N].cYEEVkDR.[C]	P23528	CFL1	1.04093	0.483202	1.29253	0.636717	1.53745	0.772119	1.28758	1.11324	0.886752	0.949481
[V].aVSDGVIk.[V]	P23528	CFL1	1.03697	0.493505	1.27034	0.568244	1.44572	0.73733	1.38858	1.11107	0.870092	1.07815
[A].vISLEGkPL.[-]	P23528	CFL1	0.98371	0.765383	0.892521	1.00857	1.37761	0.721605	1.30529	1.10841	0.875456	0.961445
[K].sSTPEEVkkR.[K]	P23528	CFL1	1.12582	0.58977	0.717233	1.0066	1.20697	0.582676	1.82278	1.22593	0.803464	0.918751
[S].skDAIkk.[K]	P23528	CFL1	0.338794	0.252937	0.411742	0.388131	0.76252	0.419885	3.47691	1.81178	1.00771	1.12959
[S].sTPEEVkkR.[K]	P23528	CFL1	0.771225	0.442309	0.859473	0.61119	1.15126	0.807937	1.61055	1.30184	1.12027	1.32394
[F].wAPESAPLk.[S]	P23528	CFL1	0.722649	0.539489	0.708434	0.834938	1.15854	0.720669	1.81191	1.30004	0.99252	1.2108
[M].lPDkDcR.[Y]	P23528	CFL1	0.505651	0.173773	0.375705	0.272388	0.614959	0.667396	2.6616	1.91328	1.25541	1.55984
[C].yEEVkDR.[C]	P23528	CFL1	0.402438	0.264266	0.477391	0.463713	0.758945	0.845736	2.32367	1.75248	1.23102	1.48034
[R].vLITTDLLAR.[G]	P60842	EIF4A1	0.757366	0.801676	0.682361	0.913748	1.02148	0.758587	1.30493	1.35681	1.03018	1.37287
[F].vLDEADEMLSR.[G]	P60842	EIF4A1	1.01753	0.785804	0.995701	1.24504	1.74338	0.602834	1.14175	0.90293	0.699814	0.865215
[L].qmEAPHIIVGTPGR.[V]	P60842	EIF4A1	0.929868	0.765298	0.712929	0.957151	1.11498	0.836812	1.3744	1.2279	0.954583	1.12608
[L].vINYDLPTNR.[E]	P60842	EIF4A1	0.821425	0.530955	0.488135	0.860128	0.794351	0.789653	1.73347	1.47123	1.09921	1.41145
[Q].kLQmEAPHIIVGTPGR.[V]	P60842	EIF4A1	0.769129	0.628306	0.808582	0.92002	1.09246	0.830292	1.40137	1.23838	1.00153	1.30993
[M].eAPHIIVGTPGR.[V]	P60842	EIF4A1	0.467776	0.577527	0.635397	0.933368	1.08214	0.717088	1.64018	1.40061	1.04607	1.49983
[Y].gFEkPSAIqQR.[A]	P60842	EIF4A1	0.646261	0.679962	0.664827	0.840883	1.20985	0.788138	1.47119	1.38968	1.01048	1.29873
[S].amHGDmDqkER.[D]	P60842	EIF4A1	0.679889	0.679326	0.58994	0.727457	0.952673	1.05175	1.57749	1.38206	1.16884	1.19058
[N].mVTEEDkR.[T]	P60842	EIF4A1	0.521446	0.500746	0.476222	0.764157	1.01747	0.886441	1.56509	1.60651	1.1616	1.50031
[E].aGGGGVGGPGAk.[S]	Q8NC51-1	SERBP1	0.526332	0.467919	0.872154	0.663042	0.916474	0.52281	2.39252	1.53616	0.929759	1.17284
[A].eNkkkEAGGGGVGGPGAk.[S]	Q8NC51-1	SERBP1	0.753095	0.621005	0.679351	0.862563	0.896834	1.01442	1.40431	1.29864	1.18856	1.28122
[R].tDkSSASAPDVDDPEAFPA.[L]	Q8NC51-1	SERBP1	0.47516	0.437881	0.586851	0.722961	0.855249	0.533845	2.20763	1.68308	1.11385	1.3835
[K].dELTESPkYIqkq.[I]	Q8NC51-1	SERBP1	0.346424	0.547129	0.587723	0.666514	0.801095	0.604147	2.16257	1.57689	1.25213	1.45538
[R].tDkSSASAPDVDDPEAFP.[A]	Q8NC51-1	SERBP1	0.511146	0.514194	0.517534	0.827637	0.949752	0.582304	2.24204	1.62786	0.972829	1.25471
[K].dELTESPkYIq.[K]	Q8NC51-1	SERBP1	0.891078	0.675665	0.775154	0.955899	0.859716	0.886208	1.52472	1.22021	1.05106	1.16029
[R].fEkPLEEkGEGGEF.[S]	Q8NC51-1	SERBP1	0.376115	0.351629	0.35533	0.498056	0.647531	0.456509	3.02368	1.91687	1.06284	1.31145
[K].aIQNkDR.[A]	Q8NC51-1	SERBP1	0.411988	0.414227	0.466164	0.572981	0.747793	0.495081	2.59847	1.70401	1.13291	1.45637
[Y].sDmPPLTLEGIQDR.[V]	O14561	NDUFAB1	0.733391	0.650951	0.645362	0.996467	1.20233	0.664077	1.68344	1.32941	0.946557	1.14802
[M].pEPAkSAPAPkk.[G]	O60814	HIST1H2BK	0.3086	0.388151	0.482815	0.477371	1.0321	0.324163	3.25013	1.68166	0.995413	1.0596
[M].pEPAkSAPAPkkGSk.[K]	O60814	HIST1H2BK	0.143957	0.132623	0.191915	0.1844	0.412036	0.313765	4.06637	2.07968	1.28007	1.19519
[M].pEPAkSAPAPk.[K]	O60814	HIST1H2BK	0.253369	0.273584	0.274622	0.4111	0.553241	0.427669	3.95989	1.75724	1.02723	1.06205
[SF].aPAPkkGSk.[K]	P33778	HIST1H2BB	0.133162	0.127529	0.167906	0.192583	0.39172	0.322769	4.18178	2.14694	1.08118	1.25443
[A].vSEGTkAVTk.[Y]	Q99879	HIST1H2BM	0.876301	0.708009	0.945709	1.06262	1.08533	0.734967	1.49182	1.12717	0.874394	1.09368
[R].lLLPGELAkH.[A]	Q99879	HIST1H2BM	0.808942	0.628469	0.626878	1.04298	1.22522	0.816064	1.52632	1.24737	1.02883	1.04891
[H].aVSEGTkAVTk.[Y]	Q99879	HIST1H2BM	0.670921	0.659614	0.842382	0.829186	1.14652	0.587453	1.79542	1.37798	0.920366	1.17016
[K].gIVDqSqqAYQEAFEISk.[K]	P63104-1	YWHAZ	0.747667	0.716642	0.590202	0.808591	0.928944	0.803472	1.49466	1.42098	1.20442	1.28443
[Q].gAELSNEER.[N]	P63104-1	YWHAZ	0.797249	0.562602	0.585102	0.814048	1.0944	0.7051	2.02747	1.32611	0.9607	1.12722
[KR].lAEqAER.[Y]	P63104-1	YWHAZ	0.895931	0.659435	0.915537	1.01585	1.15749	0.764963	1.43564	1.123	0.903338	1.12883
[Q].vTPQEkEAIER.[L]	P54725-1	RAD23A	1.01609	0.47254	0.57684	0.844618	0.878178	0.715661	1.84792	1.34514	1.03876	1.26426
[N].yIQVTPQEkEAIER.[L]	P54725-1	RAD23A	0.722207	0.762346	0.809936	1.1361	1.42867	0.715568	1.30377	1.09479	0.943416	1.08319
[S].sEPAPASAAk.[Q]	P54727	RAD23B	0.744528	0.75643	0.83512	1.03821	1.42044	0.615358	1.56966	1.16933	0.829623	1.0213
[A].kQEkPAEkPAETPVATSPTATDSTSGDSSR.[S]	P54727	RAD23B	0.489881	0.615374	0.543781	0.736799	1.30507	0.450939	1.89854	1.49408	1.08424	1.38129
[A].qGPkGGSGSGPTIEEVD.[-]	P0DMV8	HSPA1A	0.98176	0.774487	0.874683	1.04056	1.14517	0.730523	1.36289	1.12777	0.86612	1.09604
[F].gAqGPkGGSGSGPTIEEVD.[-]	P0DMV8	HSPA1A	1.1222	0.87083	0.794966	1.37037	1.18687	0.774466	1.06224	0.999802	0.818052	1.00019
[Q].gPkGGSGSGPTIEEVD.[-]	P0DMV8	HSPA1A	1.48514	1.11703	0.930006	1.73716	1.44073	0.760436	0.409599	0.584927	0.693071	0.841897
[K].aqIHDLVLVGGSTR.[I]	P0DMV8	HSPA1A	0.829257	0.644943	0.679668	1.02341	1.02251	0.738189	1.47324	1.32584	1.05106	1.21188
[SG].sGPTIEEVD.[-]	P11142-1	HSPA8	1.23521	0.856	0.782969	1.32235	1.19717	0.856662	0.992478	0.91837	0.816536	1.02225
[T].gAPESVqkAk.[M]	Q92945	KHSRP	0.969093	0.807039	0.844799	1.18043	1.12738	0.861505	1.19044	1.03722	0.9271	1.05498
[Q].dGSQNTNVDkPLR.[I]	Q92945	KHSRP	0.836486	0.639911	0.664162	0.987668	0.928356	0.880825	1.46721	1.24913	1.11302	1.23322
[R].iGGGIDVPVPR.[H]	Q92945	KHSRP	0.827221	0.59858	0.557	0.905137	0.969618	0.673386	2.00769	1.39881	0.954028	1.10853
[Q].iSPDSGGLPER.[S]	Q92945	KHSRP	1.0315	0.868823	0.853074	1.1698	1.2878	0.752706	1.25327	1.02316	0.815242	0.944613
[T].vNNSTPDFGFGGQkR.[Q]	Q92945	KHSRP	0.65553	0.76709	0.629493	0.729806	1.09721	0.957835	1.47299	1.45654	1.06536	1.16815
[Q].lGPIHPPPR.[T]	Q92945	KHSRP	0.992869	0.711293	0.764508	1.1295	0.987598	0.757887	1.47391	1.20206	0.908354	1.07203
[S].qLGPIHPPPR.[T]	Q92945	KHSRP	0.785279	0.706312	0.69165	0.958048	1.10269	0.620586	1.67954	1.3574	1.00284	1.09565
[Q].gDSISSQLGPIHPPPR.[T]	Q92945	KHSRP	0.676396	0.551897	0.640779	0.848139	1.06969	0.870651	1.50778	1.3146	1.13609	1.38397
[M].lDDIVSR.[G]	Q92945	KHSRP	0.783204	0.562908	0.624726	0.925835	0.882747	0.821173	1.67522	1.29862	1.10495	1.32062
[F].dqLTPEESkER.[L]	O43852-3	CALU	0.648736	0.667365	0.723284	0.780502	0.994644	0.888152	1.59763	1.3491	1.09088	1.2597
[Y].sHDGNTDEPEWVkTER.[E]	O43852-3	CALU	0.55187	0.747696	0.584609	0.974337	1.08453	0.647197	1.82214	1.39653	1.02159	1.16949
[A].dkDGDLIATk.[E]	O43852-3	CALU	0.634304	0.593905	0.639769	0.680458	0.848267	0.96254	1.68571	1.49205	1.15317	1.30983
[R].wIYEDVER.[Q]	O43852-3	CALU	0.923509	0.603151	0.708572	0.9888	0.950766	0.647882	1.70216	1.35279	0.989341	1.13303
[Q].lTPEESkER.[L]	O43852-3	CALU	0.399446	0.341325	0.387428	0.545371	0.739479	0.719905	2.44101	1.77554	1.19318	1.45732
[S].kPTEkkDR.[V]	O43852-3	CALU	0.594802	0.554797	0.609912	0.832508	1.20751	0.711613	1.84026	1.37544	1.08186	1.19129
[L].aEGPGAEGPR.[L]	Q13263	TRIM28	1.1557	1.08342	1.08409	1.44357	1.55237	0.387355	1.18412	0.841414	0.544021	0.723936
[A].sGSPGPGEGSAGGEkR.[S]	Q13263	TRIM28	1.18982	1.26297	1.1815	1.52683	1.84649	0.344329	0.960287	0.6339	0.486259	0.567607
[N].sTGPAPMAPPR.[A]	Q13263	TRIM28	1.10428	0.903545	0.954687	1.26678	1.22397	0.56207	1.32451	1.03716	0.709046	0.913954
[A].lAEGPGAEGPR.[L]	Q13263	TRIM28	0.803258	0.756012	0.699441	1.00672	1.10892	0.659477	1.65367	1.24888	0.913339	1.15029
[M].aLAEGPGAEGPR.[L]	Q13263	TRIM28	0.682625	0.702672	0.654014	0.956678	1.02415	0.748597	1.56516	1.37084	1.01737	1.27788
[Q].eLSGGPGDGP.[-]	Q13263	TRIM28	1.166	0.800521	0.935868	1.20667	1.27393	0.726309	1.14548	1.00559	0.807981	0.931645
[R].lqEkLSPPYSSPq.[E]	Q13263	TRIM28	0.988198	0.786622	0.832185	1.11383	1.18672	0.772675	1.26737	1.11736	0.908494	1.02655
[Q].eFAQDVGR.[M]	Q13263	TRIM28	0.571478	0.674377	0.705039	0.924151	1.11019	0.730719	1.56728	1.33288	1.07956	1.30433
[L].dDSATIcR.[V]	Q13263	TRIM28	0.97538	0.774109	0.835415	1.09536	1.1674	0.614865	1.50677	1.13559	0.857005	1.0381
[Q].aVETPGWkAPEDAGPQPGSYEIR.[H]	Q9Y5Z4-1	HEBP2	0.625949	0.523093	0.53317	0.804748	0.921396	0.829082	1.73786	1.42879	1.18586	1.41006
[K].gAEEmETVIPVDVm.[R]	Q99497	PARK7	0.686892	0.681663	0.678481	1.01348	1.10076	0.731146	1.62524	1.2921	0.998687	1.19156
[Q].vkAPLVLkD.[-]	Q99497	PARK7	0.928881	0.98113	0.800534	0.941305	1.44379	1.14327	0.917323	0.941642	1.00622	0.895901
[K].gAEEMETVIPVDVmR.[R]	Q99497	PARK7	0.676731	0.61243	0.67244	0.88201	1.05915	0.772412	1.6648	1.3212	1.01743	1.32139
[L].akGAEEmETVIPVDVmR.[R]	Q99497	PARK7	0.554687	0.526998	0.553786	0.729432	0.952707	0.794098	1.7444	1.58848	1.13642	1.41899
[T].vAGLAGkDPVQcSR.[D]	Q99497	PARK7	0.578176	0.630483	0.521016	0.67859	0.899963	1.10741	1.59228	1.54058	1.18179	1.2697
[A].gLAGkDPVqcSR.[D]	Q99497	PARK7	0.342439	0.339887	0.480188	0.446836	0.77092	0.941754	1.98254	1.71078	1.347	1.63765
[M].eTVIPVDVMR.[R]	Q99497	PARK7	0.833022	0.602129	0.693592	0.972297	0.985727	0.805823	1.60757	1.33854	0.936514	1.22478
[E].tVIPVDVMR.[R]	Q99497	PARK7	0.582067	0.439422	0.517477	0.619694	0.747982	0.563237	2.28253	1.82369	1.03442	1.38948
[V].kAPLVLk.[D]	Q99497	PARK7	0.627966	0.378565	0.518182	0.700748	0.684444	0.854029	1.83439	1.63174	1.18642	1.58352
[P].sVPAAEPEYPkGIR.[A]	P54819	AK2	0.550209	0.480408	0.466874	0.645711	0.765861	0.850254	1.98939	1.61293	1.17098	1.46739
[S].vPAAEPEYPkGIR.[A]	P54819	AK2	0.563716	0.44603	0.503793	0.686169	0.792075	0.639826	2.15505	1.62816	1.13545	1.44974
[M].aPSVPAAEPEYPkGIR.[A]	P54819	AK2	0.307645	0.283606	0.255081	0.409442	0.557923	0.868217	2.27108	1.75342	1.42974	1.86384
[A].pSVPAAEPEYPkGIR.[A]	P54819	AK2	1.0183	0.691065	0.762192	1.17261	1.47323	0.674981	1.24117	1.05857	0.903106	1.00478
[M].pmFIVnTnVPR.[A]	P14174	MIF	0.704932	0.632453	0.591727	0.77306	0.92299	0.92264	1.58886	1.39187	1.23484	1.23663
[H].sIGkIGGAQNR.[S]	P14174	MIF	0.6176	0.536397	0.569959	0.732537	0.909518	0.83485	1.88796	1.47185	1.1892	1.25012
[F].iVnTNVPR.[A]	P14174	MIF	0.331746	0.370894	0.344867	0.465737	0.59789	0.80851	2.23112	1.99249	1.3653	1.49145
[A].eNIQPGEQkYEYk.[S]	Q04637-9	EIF4G1	0.951908	0.726071	0.826233	1.09666	1.17227	0.840181	1.24425	1.07965	0.946448	1.11632
[Q].anGETPqVAVIVRPDDR.[S]	Q04637-9	EIF4G1	0.825437	0.700256	0.728173	0.989752	1.07982	0.730815	1.61012	1.27596	0.907871	1.15179
[M].sVEESTPISR.[E]	Q04637-9	EIF4G1	0.879519	0.661444	0.698567	1.01237	0.962254	0.829832	1.54693	1.23621	0.990535	1.18235
[Q].mSVEESTPISR.[E]	Q04637-9	EIF4G1	0.97089	0.677977	0.701058	1.0274	1.15441	0.669299	1.52407	1.23798	0.911629	1.12529
[T].qVAVSVPkR.[R]	Q04637-9	EIF4G1	0.962379	0.795315	0.806527	1.23882	1.29252	0.793682	1.27047	1.02296	0.855387	0.961937
[M].nQPPqIAPkR.[E]	Q04637-9	EIF4G1	1.13635	0.736306	0.779144	1.08572	1.07227	0.871049	1.39022	1.04964	0.918481	0.960823
[R].aLPSEELNR.[Q]	Q04637-9	EIF4G1	0.982392	0.681997	0.839527	1.17809	1.15511	0.700994	1.3824	1.14012	0.859621	1.07975
[Q].aVPTESTDNR.[R]	Q04637-9	EIF4G1	0.78698	0.709021	0.781403	1.00725	1.23276	0.613101	1.58203	1.22011	0.879389	1.18796
[S].vEESTPISR.[E]	Q04637-9	EIF4G1	0.699698	0.519599	0.551877	0.838626	0.936981	0.759728	1.87496	1.44588	1.0901	1.28254
[A].vIVRPDDR.[S]	Q04637-9	EIF4G1	1.10101	0.776671	0.826276	1.18042	1.20708	0.931025	1.1454	1.03604	0.874039	0.922048
[Q].vAVSVPkR.[R]	Q04637-9	EIF4G1	1.20646	1.00477	1.00749	1.69888	1.62315	0.888137	0.574508	0.607189	0.628102	0.761315
[Q].aVPTESTDNRR.[V]	Q04637-9	EIF4G1	1.11555	0.879808	0.873536	1.40719	1.40148	0.696665	1.06923	0.920456	0.746608	0.889475
[Q].vSVEVDSAPGTDLAk.[I]	P08727	KRT19	0.814232	0.652188	0.843028	1.03313	1.45323	0.707737	1.38673	1.22904	0.846328	1.03436
[L].eAAnGELEVk.[I]	P08727	KRT19	2.7055	0.745332	0.937287	1.41466	1.10116	0.399841	0.843637	0.688775	0.517257	0.646564
[E].vDSAPGTDLAk.[I]	P08727	KRT19	0.839959	1.05367	1.47993	1.26547	2.71376	0.35001	0.753833	0.577022	0.416765	0.549579
[S].vEVDSAPGTDLAk.[I]	P08727	KRT19	0.844242	0.690066	0.774791	1.05992	1.56121	0.696895	1.43914	1.11402	0.819864	0.999848
[L].eAAnGELEVkIR.[D]	P08727	KRT19	1.3872	1.26012	1.2094	1.47218	1.4615	0.556967	0.825487	0.656856	0.538391	0.631904
[A].lEDTLAETEAR.[F]	P08727	KRT19	0.732969	0.879838	0.928596	1.12894	1.68238	0.498727	1.26381	1.04998	0.82222	1.01255
[F].gGLGGGSVR.[F]	P08727	KRT19	1.68089	1.53456	1.38608	2.00376	2.35286	0.143364	0.32996	0.219579	0.167104	0.181847
[S].fGGLGGGSVR.[F]	P08727	KRT19	0.89511	0.975516	1.01428	1.29231	1.42101	0.626563	1.25171	0.927484	0.778588	0.817425
[V].sVEVDSAPGTDLAk.[I]	P08727	KRT19	0.870554	0.840087	0.952851	0.959309	1.22828	0.91217	1.11411	1.068	0.989843	1.06479
[R].aPSIHGGSGGR.[G]	P08727	KRT19	0.614459	0.532904	0.541148	0.696311	0.786102	0.597233	2.2452	1.62863	1.10796	1.25006
[A].gENPLEFLR.[D]	P54725-1	RAD23A	0.742825	0.62342	0.838531	0.95946	1.12554	0.688403	1.58397	1.23128	1.04755	1.15903
[G].sVPSSGSSGR.[E]	P54725-1	RAD23A	0.636186	0.411284	0.439261	0.668446	0.689836	0.540044	1.21425	1.29705	1.1441	2.95954
[A].qAPAQTPAPALPGPALPGPFPGGR.[V]	O00303	EIF3F	0.697632	0.550592	0.709317	0.877205	1.02676	0.817905	1.48695	1.41268	1.12348	1.29749
[Q].aPAQTPAPALPGPALPGPFPGGR.[V]	O00303	EIF3F	0.703391	0.67681	0.635718	0.93759	0.864167	0.814382	1.74618	1.27587	1.14947	1.19642
[V].sNTSSGEGSQPSR.[T]	Q9UMX0-1	UBQLN1	0.38711	0.343953	0.33021	0.551205	0.756417	0.679658	2.28259	1.88056	1.22661	1.56168
[S].nTSSGEGSQPSR.[T]	Q9UMX0-1	UBQLN1	0.593976	0.494826	0.503184	0.806149	0.967143	0.811936	1.79775	1.50578	1.1989	1.32036
[T].sSGEGSqPSR.[T]	Q9UMX0-1	UBQLN1	1.03611	0.699307	0.58381	1.16374	1.19192	0.688247	1.40846	1.15862	0.95535	1.11445
[N].tSSGEGSqPSR.[T]	Q9UMX0-1	UBQLN1	0.708802	0.478228	0.538366	0.835886	1.00925	0.559406	2.15634	1.49523	0.975857	1.24263
[L].aGVNPqLqNPEVR.[F]	Q9UMX0-1	UBQLN1	0.674176	0.591061	0.613278	0.805817	0.974374	0.775906	1.65433	1.44402	1.11579	1.35125
[G].vNPqLqNPEVR.[F]	Q9UMX0-1	UBQLN1	0.851003	0.558581	0.64388	0.908969	0.956477	0.650797	1.83759	1.38896	0.970199	1.23354
[S].sGEGSqPSR.[T]	Q9UMX0-1	UBQLN1	1.01519	0.56764	0.635603	1.01919	0.937362	0.794155	1.56252	1.28523	0.953043	1.23007
[ML].lNNPDIMR.[Q]	Q9UMX0-1	UBQLN1	0.845199	0.681771	0.804011	1.0632	1.24705	0.639479	1.53125	1.18128	0.856631	1.15013
[R].eIGLLSEEVELYGETk.[A]	P11586	MTHFD1	0.994483	1.09009	0.761036	1.19111	1.14767	0.747472	0.972936	1.01837	0.872075	1.20477
[M].aPAEILnGkEISAqIR.[A]	P11586	MTHFD1	0.903433	0.809735	0.724971	1.32775	1.15719	0.688051	1.2915	1.04413	0.972975	1.08026
[L].yDLkLPVEDkIR.[I]	P11586	MTHFD1	1.101	0.811222	0.973323	1.27378	1.45243	0.635692	0.922476	0.982402	0.866498	0.98118
[TA].gITPTPLGEGk.[S]	P11586	MTHFD1	1.43959	0.720967	0.984229	1.37727	1.1823	0.738833	1.01687	0.882895	0.741227	0.915819
[T].dTESELDLISR.[L]	P11586	MTHFD1	0.746105	0.606766	0.719225	0.900705	1.11302	0.769349	1.52651	1.28751	1.01081	1.32001
[L].kLPVEDkIR.[I]	P11586	MTHFD1	1.17784	0.802598	0.89351	1.21529	1.251	0.736062	1.06527	0.99864	0.840045	1.01974
[N].yVPDDkkPnGR.[K]	P11586	MTHFD1	0.947429	0.836486	0.829772	1.12272	1.38742	0.673837	1.14839	1.06874	0.907962	1.07725
[F].kTDTESELDLISR.[L]	P11586	MTHFD1	0.916959	0.870197	0.838	1.01182	1.27783	0.897173	1.19526	1.10909	0.90897	0.974712
[R].gVSSESSGDR.[E]	Q13435	SF3B2	0.308553	0.428907	0.619103	0.574611	0.98387	0.429833	2.5122	1.71045	1.05734	1.37512
[V].sSESSGDREkDSTR.[S]	Q13435	SF3B2	1.17336	0.970391	0.993426	1.48363	1.32507	0.689506	0.884164	0.845645	0.749157	0.885638
[K].lAEIGAPIqGNR.[E]	Q13435	SF3B2	0.693604	0.547101	0.60424	0.861338	0.952345	0.669347	1.9823	1.43356	0.98657	1.2696
[F].sSVPAGmETPELIELR.[K]	Q13435	SF3B2	0.851268	0.75011	0.767103	0.994833	1.16855	0.792195	1.42115	1.22596	0.920603	1.10823
[M].aHPPNLGPPPPLR.[V]	Q13435	SF3B2	0.800009	0.675769	0.798536	0.990057	1.11157	0.781953	1.5204	1.18372	0.940224	1.19777
[A].eIGAPIqGNR.[E]	Q13435	SF3B2	0.664613	0.542773	0.606901	0.835258	0.95918	0.720984	1.95401	1.39999	1.04762	1.26868
[G].dLYYEGk.[E]	Q13435	SF3B2	0.610535	0.432184	0.502981	0.710319	0.738663	0.74775	1.99537	1.61395	1.19068	1.45756
[K].aYLPVNESFGFTADLR.[S]	P13639	EEF2	0.789285	0.648349	0.780776	1.18001	0.948652	0.89597	1.13685	1.30935	0.967857	1.34291
[S].aTSPEGkkLPR.[T]	P13639	EEF2	0.592619	0.372358	0.56753	0.722236	0.715619	0.80036	1.92225	1.56373	1.2386	1.5047
[R].eTVSEESnVLcLSk.[S]	P13639	EEF2	0.89966	0.603605	0.825491	0.963575	0.937176	0.904735	1.33694	1.21718	1.08551	1.22613
[M].vnFTVDqIR.[A]	P13639	EEF2	0.878094	0.759576	0.723328	1.14165	1.04381	0.901091	1.25244	1.15928	1.01936	1.12138
[K].dLEEDHAcIPIkkSD.[P]	P13639	EEF2	0.461003	0.921452	0.622073	0.866574	1.16602	0.976424	1.42138	1.18749	1.08108	1.29649
[R].vTDGALVVVDcVSGV.[C]	P13639	EEF2	0.704517	0.658189	0.535197	0.788462	0.957334	0.802412	1.50618	1.43993	1.23147	1.37631
[K].fSVSPVVR.[V]	P13639	EEF2	0.691742	0.562896	0.58918	0.88552	0.966475	0.935799	1.61857	1.37485	1.08877	1.2862
[A].fSSVGSVITk.[K]	P55327-3	TPD52	0.957115	0.87226	0.823827	1.24699	1.23991	0.67053	1.43304	1.10534	0.771077	0.879909
[T].eTLSEEEQEELRR.[E]	P55327-3	TPD52	0.979177	0.706902	0.734154	1.01604	1.10794	0.762397	1.44716	1.21186	0.919004	1.11537
[S].aTETLSEEEQEELRR.[E]	P55327-3	TPD52	0.788119	0.849509	0.767782	1.10362	1.16621	0.639071	1.61669	1.16292	0.82051	1.08556
[T].tTEPLPEkTqESL.[-]	P55327-3	TPD52	0.842196	0.732085	0.682908	1.06802	1.11516	0.712124	1.52665	1.24939	0.948332	1.12314
[K].kLEDVkNSPTFk.[S]	P55327-3	TPD52	1.04383	0.68791	0.772034	1.01584	1.03029	0.780794	1.50836	1.21195	0.921138	1.02786
[L].eNEkDLEEAEEYkEAR.[L]	O75347	TBCA	0.426267	0.499322	0.489627	0.601264	0.951478	0.687923	1.98226	1.60128	1.2678	1.49278
[R].aEDGENYDIkkQ.[A]	O75347	TBCA	0.227794	0.230193	0.226666	0.33673	0.383616	0.67202	2.38406	2.03142	1.57909	1.92841
[L].eNEkDLEEAEEYk.[E]	O75347	TBCA	0.423225	0.360875	0.409395	0.613398	0.761315	0.767972	2.30515	1.54127	1.37423	1.44317
[A].eDGENYDIk.[K]	O75347	TBCA	0.218585	0.19441	0.209093	0.289895	0.355773	1.20908	2.05022	1.88783	1.65819	1.92692
[I].kIkTGVVk.[R]	O75347	TBCA	0.419859	0.354586	0.39457	0.557076	0.712331	0.536165	2.38187	1.89248	1.30096	1.4501
[T].gITFLSGGqSEEEASINLNAINk.[C]	P04075-2	ALDOA	0.498606	0.608041	0.356534	0.640342	1.06143	0.640663	1.65821	1.61853	1.53622	1.38142
[R].tVPPAVTGITFLSGGqSEEEASINLNAINk.[C]	P04075-2	ALDOA	1.2168	1.34428	1.08022	1.35758	1.68582	0.632758	0.553015	0.582947	0.752327	0.794252
[K].fSHEEIAMATVTALR.[R]	P04075-2	ALDOA	0.907543	0.737905	0.784885	1.10975	1.21133	0.751084	1.42891	1.06031	0.911497	1.09678
[K].gILAADESTGSIAk.[R]	P04075-2	ALDOA	1.01571	0.859138	0.895681	1.22456	1.25212	0.63426	1.18641	1.05178	0.856164	1.02417
[Q].sIGTENTEENRR.[F]	P04075-2	ALDOA	0.740776	0.682221	0.674932	0.894908	1.09745	1.00625	1.51202	1.21139	1.00402	1.17603
[L].aLPEPSPAAPTLR.[S]	Q15149-1	PLEC	1.07902	0.669354	0.856195	1.06965	1.11301	0.545993	1.66508	1.19602	0.77758	1.0281
[R].aETEQGEqQR.[Q]	Q15149-1	PLEC	0.478907	0.501809	0.586625	0.783078	0.788346	0.554262	2.3024	1.65415	1.02708	1.32334
[L].eqGAQEESR.[C]	Q15149-1	PLEC	0.374272	0.308138	0.354397	0.504428	0.622241	0.532491	2.72409	1.9576	1.11233	1.51001
[Q].aEEIGEkLHR.[T]	Q15149-1	PLEC	0.695013	0.650767	0.69416	0.833831	1.12916	0.641598	1.74289	1.40199	0.974849	1.23575
[L].aEEDLAqQR.[A]	Q15149-1	PLEC	0.503601	0.476007	0.516864	0.692277	0.808373	0.640182	2.25632	1.62799	1.04999	1.42839
[Q].qEqSVLDqLR.[G]	Q15149-1	PLEC	0.931213	0.690374	0.76423	0.971808	1.04102	0.86993	1.34476	1.2512	0.987055	1.14841
[Q].aEEVAqqk.[S]	Q15149-1	PLEC	0.895161	0.6283	0.745179	0.970397	0.988438	0.686226	1.70977	1.3017	0.932383	1.14245
[E].tEQGEqqR.[Q]	Q15149-1	PLEC	0.604875	0.463468	0.546938	0.741191	0.787581	0.616119	2.25206	1.60713	1.09448	1.28616
[R].qHEAEEGVR.[R]	Q15149-1	PLEC	0.804115	0.527659	0.806507	1.21332	1.1602	0.589854	1.58903	1.1894	0.905766	1.21415
[R].sNAEDTLR.[S]	Q15149-1	PLEC	0.970298	0.632729	0.61018	1.06287	0.923353	0.633289	1.76066	1.33048	0.924839	1.15131
[Q].gLASYDYVR.[R]	Q15149-1	PLEC	0.645261	0.620715	0.806087	0.967058	1.08744	0.812026	1.51835	1.29081	1.01266	1.2396
[R].aPVPASELLAS.[G]	Q15149-1	PLEC	0.756868	0.640088	0.675978	1.01139	1.19586	0.827845	1.44153	1.2757	0.989397	1.18535
[Q].vqDESqR.[K]	Q15149-1	PLEC	0.735453	0.447193	0.574739	0.842532	0.698358	0.702918	1.45587	1.97969	0.955152	1.6081
[K].eDTEEHHLR.[D]	P22626	HNRNPA2B1	0.729639	0.487655	0.592415	0.701343	0.766669	0.684669	2.26187	1.51054	1.009	1.2562
[P].gGSGGSGGYGGR.[S]	P22626	HNRNPA2B1	0.826754	0.989582	0.692529	1.16859	1.16359	0.543711	1.48597	1.13862	0.875807	1.11484
[K].lFIGGLSFETTEESLR.[N]	P22626	HNRNPA2B1	0.883772	0.549552	0.543598	0.910516	1.16355	0.597446	1.8283	1.38652	1.08612	1.05063
[Y].gPGGSGGSGGYGGR.[S]	P22626	HNRNPA2B1	0.273608	0.269101	0.314818	0.334937	0.469588	1.41234	2.58857	1.18664	2.01358	1.13682
[R].gGSDGYGSGR.[G]	P22626	HNRNPA2B1	0.354247	0.419431	0.363704	0.593853	0.728034	0.434479	3.15314	1.66411	0.960177	1.32883
[R].gGNFGFGDSR.[G]	P22626	HNRNPA2B1	0.800708	0.547814	0.652236	0.898987	0.926642	0.649262	2.06441	1.38126	0.925613	1.15306
[G].sDGYGSGR.[G]	P22626	HNRNPA2B1	0.746116	0.62454	0.764457	0.866324	0.923286	0.596296	2.05111	1.33083	0.93692	1.16012
[E].dTEEHHLR.[D]	P22626	HNRNPA2B1	0.71204	0.576245	0.724834	0.985584	1.00941	0.676612	1.72489	1.33792	0.988362	1.26411
[K].lmGSLDENSDQqVDFqEYAVF.[L]	P29034	S100A2	0.566221	0.556683	0.463008	0.772777	0.835099	0.865647	1.44952	1.51812	1.37144	1.60148
[C].nDFFqGcPDRP.[-]	P29034	S100A2	0.481837	0.329958	0.359415	0.526275	0.575509	1.08401	1.77512	1.75988	1.44167	1.66632
[N].dFFQGcPDRP.[-]	P29034	S100A2	0.43875	0.353685	0.374922	0.62464	0.551802	1.29664	1.51533	1.66804	1.4273	1.74889
[E].kVDEEGLkk.[L]	P29034	S100A2	0.377307	0.336987	0.346947	0.474341	0.59131	0.90552	2.15677	1.71426	1.41461	1.68196
[D].fFqGcPDRP.[-]	P29034	S100A2	0.596329	0.371188	0.434578	0.614985	0.632505	1.25572	1.51557	1.5923	1.42906	1.55777
[M].pGGLLLGDVAPNFEANTTVGR.[I]	P30041	PRDX6	0.804517	0.9592	0.560265	0.82927	1.05076	0.980191	1.17464	1.21057	1.25317	1.17741
[Y].ncEEPTEkLPFPIIDDR.[N]	P30041	PRDX6	0.587444	0.577769	0.532304	0.652692	0.863556	0.790588	1.8842	1.57034	1.17914	1.36197
[C].eEPTEkLPFPIIDDR.[N]	P30041	PRDX6	1.28938	0.857487	0.620498	1.44455	0.945201	0.661436	1.22461	1.05906	0.868578	1.02921
[A].kLAPEFAkR.[N]	P30041	PRDX6	0.937963	0.691421	0.699906	0.919872	1.0793	0.707013	1.39274	1.28634	0.999474	1.28597
[K].eLPSGkkYLR.[Y]	P30041	PRDX6	0.970635	0.826948	0.798739	1.2039	1.12633	0.881689	0.900974	0.961837	1.00981	1.31913
[K].fQDGDLTLYQSNTILR.[H]	P09211	GSTP1	0.50268	0.473782	0.453927	0.708651	0.789009	0.877475	1.80575	1.55259	1.24978	1.58635
[M].pPYTVVYFPVR.[G]	P09211	GSTP1	0.0580233	0.0640221	0.05577	0.0898931	0.138032	1.56209	2.15635	2.00965	1.98833	1.87784
[K].eEVVTVETWQEGSLk.[A]	P09211	GSTP1	0.693365	0.669714	0.619704	1.01966	1.09488	0.808299	1.4892	1.29505	1.05186	1.25827
[Y].tVVYFPVR.[G]	P09211	GSTP1	0.136007	0.110076	0.0951339	0.127344	0.188602	0.898885	2.74433	2.21753	1.61022	1.87187
[K].vAPAqPSEEGPGR.[K]	P23588	EIF4B	1.20359	0.652645	0.682598	1.13126	1.04314	0.871064	1.28479	1.04427	0.963942	1.1227
[A].tDSFDDYPPR.[R]	P23588	EIF4B	0.776925	0.63412	0.641481	0.944254	1.01558	0.743454	1.72716	1.35017	0.989876	1.17698
[A].sIFGGAkPVDTAAR.[E]	P23588	EIF4B	0.717903	0.690189	0.793573	0.947446	1.13457	0.856824	1.43713	1.24837	1.01546	1.15854
[R].sAPEPkkPEENPASkF.[S]	P23588	EIF4B	0.713974	0.485741	0.640479	0.810315	0.998057	0.601146	2.13672	1.43896	1.01268	1.16192
[F].gGAkPVDTAAR.[E]	P23588	EIF4B	0.616349	0.548478	0.588355	0.808966	0.971441	0.737068	1.79864	1.42789	1.10629	1.39651
[Q].lDEPkLER.[R]	P23588	EIF4B	1.21644	0.65575	0.76309	1.06783	0.957645	1.00786	1.13256	1.05655	0.973869	1.1684
[R].sILPTAPR.[A]	P23588	EIF4B	0.702027	0.547776	0.617585	0.806603	0.944862	0.646548	2.06757	1.4509	0.969307	1.24682
[R].sAAPPQEkkR.[K]	P20810-6	CAST	0.650786	0.613677	0.575005	0.724424	0.939834	0.975333	1.63705	1.45294	1.17738	1.25358
[R].sIkEVDEAkAk.[E]	P20810-6	CAST	0.539068	0.457436	0.447861	0.701156	0.702409	1.01537	1.96967	1.50085	1.29176	1.37442
[C].gEDDETIPSEYR.[L]	P20810-6	CAST	0.480032	0.466598	0.385001	0.74214	0.745467	0.721304	1.76275	1.76808	1.22468	1.70395
[A].aPAPVSEAVcR.[T]	P20810-6	CAST	0.575753	0.515602	0.654772	0.744055	1.00263	0.831338	1.72114	1.41764	1.12576	1.41132
[S].ikEVDEAkAk.[E]	P20810-6	CAST	0.774553	0.514943	0.644278	0.911537	0.917439	1.03702	1.50786	1.28872	1.15586	1.24778
[R].qAEPELDLR.[S]	P20810-6	CAST	0.680976	0.553246	0.557695	0.831229	0.9117	0.830028	1.68209	1.49144	1.11288	1.34872
[Q].sAPPEPATLk.[G]	P20810-6	CAST	0.999154	0.695086	0.72543	1.0981	1.06208	0.921207	1.31065	1.13407	0.955227	1.09899
[K].gTVPDDAVEAL.[A]	P20810-6	CAST	0.95918	0.67398	0.702668	0.981756	0.997474	0.816527	1.46399	1.25938	0.962342	1.1827
[T].yIEELGkR.[E]	P20810-6	CAST	0.409465	0.312047	0.335329	0.501134	0.577471	0.932202	2.08794	1.76744	1.41489	1.66208
[I].aPDSGGLPER.[S]	Q96AE4-2	FUBP1	0.493297	0.368689	0.428861	0.613182	0.66182	0.973754	2.07713	1.56724	1.29596	1.52007
[R].iGGNEGIDVPIPR.[F]	Q96AE4-2	FUBP1	0.776773	0.524793	0.590927	0.883015	0.876994	0.650932	2.23616	1.46927	0.914033	1.0771
[Q].iAPDSGGLPER.[S]	Q96AE4-2	FUBP1	1.26858	0.780202	0.814361	1.20405	1.04712	0.735849	1.40347	1.01598	0.818013	0.912381
[Q].dGPqNTGADkPLR.[I]	Q96AE4-2	FUBP1	1.41704	0.692675	0.702767	1.2139	0.934488	0.824209	1.23803	1.03893	0.915755	1.02221
[N].dAFkDALqR.[A]	Q96AE4-2	FUBP1	0.977999	0.735064	0.769114	1.12809	1.12027	0.683103	1.5053	1.19786	0.823566	1.05963
[K].iGGDAGTSL.[N]	Q96AE4-2	FUBP1	0.836338	0.734375	0.823012	1.0126	1.19219	0.688308	1.58195	1.13739	0.929225	1.06461
[Y].nEATGGkYVPR.[A]	P68371	TUBB4B	0.6692	0.465184	0.546509	0.758925	0.823513	0.785554	1.7956	1.5493	1.20144	1.40478
[Q].aGqcGNqIGAk.[F]	P68371	TUBB4B	1.02112	1.03701	1.20394	1.37172	1.32108	0.70029	0.936116	0.828302	0.725779	0.854643
[Y].ynEATGGkYVPR.[A]	P68371	TUBB4B	1.01487	1.08319	1.27749	1.14175	1.25356	0.686456	0.952705	0.888711	0.793268	0.907998
[L].vDSVLDVVR.[K]	P68371	TUBB4B	1.01422	0.652458	0.77833	1.01831	0.956529	0.882486	1.32472	1.23316	0.949755	1.19003
[G].qcGNqIGAk.[F]	P68371	TUBB4B	0.711158	0.620327	0.618792	0.972491	1.01603	0.743944	1.59194	1.35186	1.0301	1.34336
[K].eVDEqMLNVq.[N]	P68371	TUBB4B	0.732477	0.793378	0.712249	0.802782	1.04914	1.00895	1.38258	1.28772	1.06846	1.16226
[F].gSNkNRPEDYqGGR.[T]	Q15084-2	PDIA6	0.501819	0.477584	0.44794	0.661954	0.866792	0.746318	1.95042	1.589	1.19369	1.56448
[G].lYSSSDDVIELTPSNFNR.[E]	Q15084-2	PDIA6	0.539859	0.803539	0.630659	0.83794	1.23735	0.655883	1.45464	1.51193	0.977277	1.35093
[S].tAPVGGGAFPTIVER.[E]	Q15084-2	PDIA6	0.834877	0.566371	0.695915	0.699358	0.944331	0.911058	1.51798	1.50605	1.18657	1.1375
[Y].gVqGFPTIk.[I]	Q15084-2	PDIA6	0.609915	0.587898	0.664823	0.883838	1.14848	0.809426	1.54396	1.32494	1.06572	1.361
[S].lFDEEGAkIVk.[D]	P00558	PGK1	0.318869	0.276106	0.404041	0.390341	0.727822	0.591266	2.45158	1.96015	1.27876	1.60107
[Y].sLEPVAVELk.[S]	P00558	PGK1	1.19347	0.976823	1.65738	1.17782	1.36887	0.688847	0.927187	0.768815	0.58726	0.653534
[K].dcVGPEVEkA.[C]	P00558	PGK1	0.920692	0.794974	0.882925	1.099	0.983127	0.804634	1.34193	1.17093	0.886587	1.11519
[I].kAAVPSIk.[F]	P00558	PGK1	0.61661	0.459545	0.49714	0.655148	0.778102	0.692142	2.18453	1.58758	1.1093	1.4199
[N].kVkAEPAk.[I]	P00558	PGK1	0.236096	0.308669	0.551671	0.526727	0.908662	0.722142	2.23918	1.63498	1.284	1.58787
[L].fDEEGAkIVk.[D]	P00558	PGK1	0.353591	0.317318	0.411079	0.482458	0.674057	0.591248	2.4159	1.94572	1.34081	1.46782
[A].sLELLEGk.[VI]	P00558	PGK1	0.754014	1.08094	1.15244	0.995603	1.25801	0.802468	1.08688	1.07765	0.878444	0.913551
[L].ePVAVELk.[S]	P00558	PGK1	0.461591	0.326147	0.51659	0.548532	0.720882	0.928992	2.04636	1.77287	1.15645	1.52158
[S].lFDEEGAk.[I]	P00558	PGK1	0.470251	0.478965	0.634516	0.672077	1.03484	0.724748	1.95373	1.51612	1.12152	1.39324
[K].aAVPSIkF.[C]	P00558	PGK1	0.59304	0.392421	0.688905	0.68602	0.868529	0.564309	2.5017	1.56326	0.986746	1.15507
[K].aLESPERPF.[L]	P00558	PGK1	0.754141	0.624896	0.707744	0.946698	1.05056	0.74434	1.62712	1.32832	1.04721	1.16897
[K].aAVPSIk.[F]	P00558	PGK1	0.948066	0.639303	1.05419	0.970614	1.13123	0.623812	1.6234	1.13202	0.871919	1.00545
[A].iVkPGVPmEIVLNkESR.[R]	Q9Y4L1	HYOU1	0.585925	0.637372	0.684817	0.817518	1.10234	0.892237	1.3936	1.48311	1.16472	1.23836
[E].gLMDDVDFkAk.[V]	Q9Y4L1	HYOU1	1.11175	0.914698	0.76879	1.08107	1.19412	0.895762	1.07872	1.0428	0.909555	1.00274
[G].dLGFLGPEDLR.[V]	Q9Y4L1	HYOU1	0.473178	0.426433	0.471176	0.619625	0.741649	0.635938	2.13354	1.70848	1.1738	1.61618
[K].gVGDSFkkYPDYESk.[G]	Q9Y4L1	HYOU1	0.789736	0.765866	0.708058	0.923492	0.983005	0.976831	1.35779	1.22669	1.1067	1.16183
[E].gVAPAPEGEkkqkPAR.[K]	Q9Y4L1	HYOU1	1.01776	0.520357	0.715569	0.876141	0.987997	0.831182	1.64659	1.2166	1.02522	1.16259
[K].aVGkEELGkNINAD.[E]	Q9Y4L1	HYOU1	1.00609	0.651686	0.601	0.984886	0.928109	0.96156	1.4123	1.22425	1.05583	1.17429
[R].eVEEEPGIH.[S]	Q9Y4L1	HYOU1	0.755141	0.503536	0.501776	0.885098	0.794421	0.841802	1.83146	1.44239	1.09837	1.34601
[L].gFLGPEDLR.[V]	Q9Y4L1	HYOU1	1.13789	0.895645	0.88858	1.31254	1.20093	0.603268	1.21407	0.997357	0.780115	0.969599
[QK].kLQDLTLR.[DC]	Q9Y4L1	HYOU1	0.546318	0.602817	0.555342	0.834605	0.994418	0.685998	1.78844	1.48505	1.12976	1.37725
[M].dDVDFkAk.[V]	Q9Y4L1	HYOU1	0.391996	0.328266	0.439357	0.482289	0.634577	0.80315	2.108	1.79186	1.35242	1.66808
[S].ekSPTADAkPAPk.[R]	O00515	LAD1	0.299982	0.310635	0.327883	0.446784	0.537305	0.826049	2.35106	1.80847	1.43823	1.65361
[R].tLEDEEEQER.[E]	O00515	LAD1	0.863003	0.6229	0.579009	0.930631	1.01652	0.80579	1.52055	1.34394	1.0266	1.29106
[S].ekSPTADAkPAPkR.[A]	O00515	LAD1	0.565733	0.483846	0.452069	0.59798	0.722997	1.22389	1.33575	1.51596	1.47665	1.62513
[A].lASEkSPTADAkPAPkR.[A]	O00515	LAD1	0.506181	0.411357	0.421889	0.621001	0.718335	0.888572	1.87753	1.61376	1.41933	1.52204
[L].aSEkSPTADAkPAPkR.[A]	O00515	LAD1	0.588926	0.539345	0.618423	0.767137	0.893456	0.947049	1.70418	1.36712	1.16215	1.41221
[L].eDEEEQER.[E]	O00515	LAD1	0.517573	0.443228	0.404122	0.660872	0.65553	0.900875	2.00043	1.5951	1.27884	1.54343
[S].tTDDEAPR.[L]	O00515	LAD1	0.578295	0.500486	0.494298	0.723193	0.790972	1.00515	1.62805	1.46259	1.30395	1.51302
[L].eEESLVGR.[E]	O00515	LAD1	1.10826	0.645783	0.673641	1.12465	0.950047	0.797378	1.42208	1.13065	0.941967	1.20555
[S].gAqIDDNIPR.[R]	Q16555-1	DPYSL2	0.55504	0.594557	0.522773	0.702998	0.923321	0.977193	1.56757	1.43585	1.21525	1.50545
[M].vIPGGIDVHTR.[F]	Q16555-1	DPYSL2	0.699891	0.540935	0.594107	0.755419	0.92975	0.758067	1.66378	1.37506	1.28535	1.39764
[A].sSAkTSPAkqqAPPVR.[N]	Q16555-1	DPYSL2	0.289147	0.320139	0.304633	0.470117	0.537068	0.873207	2.10967	1.93525	1.44163	1.71914
[L].sGAqIDDNIPR.[R]	Q16555-1	DPYSL2	0.569629	0.535688	0.527658	0.736749	0.842912	0.988282	1.59881	1.50903	1.25999	1.43126
[V].iPGGIDVHTR.[F]	Q16555-1	DPYSL2	0.572189	0.472602	0.672548	0.77946	0.926508	0.960442	1.61385	1.34924	1.21251	1.44065
[A].qIDDNIPR.[R]	Q16555-1	DPYSL2	0.677939	0.526131	0.527516	0.795302	0.796003	0.957371	1.66795	1.46735	1.15573	1.42871
[R].mVIPGGIDVHTR.[F]	Q16555-1	DPYSL2	0.876775	0.620411	0.712117	1.01998	1.09769	0.694273	1.70879	1.29195	0.904084	1.07394
[K].gGkIVNDDQSFYAD.[I]	Q16555-1	DPYSL2	0.690374	0.577928	0.598506	0.751647	0.85762	0.947439	1.74068	1.43398	1.13979	1.26204
[R].iVAPPGGR.[SA]	Q16555-1	DPYSL2	0.424737	0.505727	0.665703	0.699996	1.02884	0.587634	1.89579	1.69651	1.09473	1.40034
[R].gSPLVVISq.[G]	Q16555-1	DPYSL2	0.812207	0.6015	0.700275	0.948406	0.923486	0.738905	1.59541	1.46964	1.00341	1.20676
[R].nDFqLIGIqDGYLSLLQDSGEVR.[E]	P63241-2	EIF5A	0.762163	0.776861	0.723801	0.804191	0.893965	0.855382	1.36478	1.36257	1.22733	1.22897
[M].tEEAAVAIk.[A]	P63241-2	EIF5A	0.622096	0.578892	0.554813	0.757574	0.980315	0.783103	1.81686	1.54026	1.06854	1.29754
[S].tHNMDVPNIkR.[N]	P63241-2	EIF5A	0.948446	0.627374	0.629678	0.931579	1.14051	0.611233	1.7668	1.27297	0.908322	1.1631
[V].gIDIFTGk.[K]	P63241-2	EIF5A	0.750296	0.596557	0.541928	0.76744	0.715542	1.03814	1.49887	1.55175	1.23487	1.3046
[H].nMDVPNIkR.[N]	P63241-2	EIF5A	0.633002	0.493491	0.517527	0.887662	0.71804	0.863484	1.95722	1.46407	1.13887	1.32663
[S].aTFPmQcSALR.[K]	P63241-2	EIF5A	0.708411	0.654971	0.730782	0.911393	0.92721	0.864512	1.44443	1.40993	1.05735	1.29102
[S].lLqDSGEVR.[E]	P63241-2	EIF5A	0.664481	0.47897	0.557198	0.756549	0.857507	0.716338	1.99223	1.51678	1.10806	1.35189
[G].iDIFTGk.[K]	P63241-2	EIF5A	0.480752	0.409614	0.415187	0.692671	0.672499	0.621492	2.16779	1.82875	1.16472	1.54653
[L].lQDSGEVR.[E]	P63241-2	EIF5A	0.643142	0.612019	0.702705	0.908472	0.950991	0.640737	1.83176	1.36677	1.04364	1.29976
[K].gLGTDEDSLIEIIcSR.[T]	P07355-2	ANXA2	0.485893	0.517988	0.655672	0.627342	0.807445	1.54762	0.84745	0.949766	1.72926	1.83157
[K].gVDEVTIVNILTNR.[S]	P07355-2	ANXA2	0.695135	0.813874	0.812621	1.00202	0.947527	0.945036	1.31797	1.03466	1.21313	1.21802
[K].lSLEGDHSTPPSAY.[G]	P07355-2	ANXA2	1.22998	0.869014	0.977018	1.15074	1.28497	0.876219	1.0343	0.943266	0.760854	0.873637
[K].aYTnFDAER.[D]	P07355-2	ANXA2	0.490942	0.499187	0.526508	0.726671	0.763251	1.30333	1.37318	1.12168	1.49078	1.70447
[F].gSDQSEnVDR.[G]	Q9UII2-1	ATP5IF1	0.568776	0.556854	0.469894	0.803893	0.904711	0.907922	1.66993	1.45613	1.19316	1.46873
[G].fGSDqSENVDR.[G]	Q9UII2-1	ATP5IF1	0.790324	0.954967	0.861033	1.26513	1.69064	0.606452	1.20383	0.992979	0.751584	0.883063
[G].sDQSENVDR.[G]	Q9UII2-1	ATP5IF1	0.294338	0.246957	0.271243	0.384109	0.461884	0.8833	2.42117	1.92624	1.38936	1.7214
[S].dQSEnVDR.[G]	Q9UII2-1	ATP5IF1	0.393115	0.294845	0.335259	0.464592	0.559678	0.654028	2.49534	2.02922	1.23004	1.54388
[K].rEqAEEER.[Y]	Q9UII2-1	ATP5IF1	0.589354	0.680069	0.6294	0.574567	0.807195	1.48191	1.10968	1.69765	1.22629	1.20389
[K].dDLVTVkTPAFAESVTEGDVR.[W]	P36957	DLST	0.512927	0.511172	0.427141	0.592562	0.845817	0.610931	2.39587	1.63957	1.1284	1.33561
[K].dDLVTVkTPAFAE.[S]	P36957	DLST	0.790598	0.628554	0.780069	0.883006	0.975198	0.771698	1.63776	1.41581	1.01084	1.10647
[T].vAPPLAEPGAGkGLR.[S]	P36957	DLST	0.769928	0.667756	0.670805	0.804532	1.02216	0.881563	1.56376	1.38421	1.0943	1.14098
[Q].eSLqDEGAEPTGYSAELSSEGIR.[D]	P15311	EZR	0.532502	0.481487	0.521647	0.794652	0.855245	0.720406	1.77565	1.60568	1.21622	1.49651
[K].iALLEEAR.[RT]	P15311	EZR	0.603186	0.595966	0.661815	0.886567	1.03776	0.863816	1.46217	1.37023	1.17416	1.34433
[K].eAQDDLVkTk.[E]	P15311	EZR	0.892072	0.557521	0.685314	0.984605	0.912528	1.08411	1.21862	1.16484	1.15607	1.34431
[Q].dYEEkTkkAER.[E]	P15311	EZR	0.525379	0.530166	0.508977	0.769447	0.917128	0.971628	1.47544	1.45249	1.36569	1.48365
[Q].qLETEkkR.[R]	P15311	EZR	1.18978	0.63488	0.722008	1.04939	0.912498	1.20042	1.11289	1.05027	1.09673	1.03115
[K].iAQDLEMYGINYFEIk.[N]	P15311	EZR	0.848413	0.680818	0.471553	0.828019	0.937479	0.845512	1.36462	1.41781	1.19726	1.40851
[A].eLSSEGIR.[D]	P15311	EZR	0.677016	0.613766	0.685081	0.922374	0.970575	0.706556	1.77374	1.30543	1.02733	1.31812
[L].sDVcDVPTAkIISR.[E]	P31939	ATIC	0.739661	0.703498	0.834328	0.858174	1.35355	0.677042	1.46821	1.31604	0.949278	1.10022
[L].sDVcDVPTAk.[I]	P31939	ATIC	1.07595	0.632834	0.99941	1.06448	1.27923	0.819088	1.22449	1.05247	0.855867	0.996172
[V].gIPLSEDEAk.[V]	P31939	ATIC	0.985395	0.553961	0.692987	0.905414	0.845718	0.927548	1.40796	1.29757	1.13645	1.247
[N].vVTkNkDLPESALR.[D]	P31939	ATIC	0.791194	0.613572	0.805558	0.909887	1.13227	0.794322	1.45848	1.2797	1.0255	1.18952
[S].eSkDTSLETR.[R]	P31939	ATIC	0.656288	0.555548	0.62396	0.862396	1.63816	0.617745	1.62001	1.33583	0.925286	1.16477
[D].vcDVPTAk.[I]	P31939	ATIC	0.485107	0.432765	0.651001	0.738999	0.891078	0.859007	1.915	1.48445	1.14083	1.40176
[K].gVSqMPLR.[Y]	P31939	ATIC	0.81016	0.642168	0.67634	0.992801	1.05019	0.68117	1.67771	1.33286	0.950526	1.18608
[K].qLEAIDQLHLEYAk.[R]	O43707	ACTN4	0.867458	0.772401	0.844254	1.02614	1.11	0.629325	1.38428	1.29944	0.918322	1.14838
[R].fAIqDISVEETSAk.[E]	P12814-4	ACTN1	0.990523	0.74231	0.804858	1.13232	1.11652	0.65197	1.3139	1.14307	0.991721	1.1128
[K].lVSIGAEEIVDGNAk.[M]	O43707	ACTN4	0.818715	0.714455	0.814497	0.860427	1.08376	0.706607	1.56696	1.28028	0.923831	1.23046
[MK].sFSTALYGESDL.[-]	P12814-4	ACTN1	0.871223	0.612295	0.779434	1.05838	1.23205	0.625807	1.558	1.1709	0.95321	1.13872
[K].dLLIAYYDVDYEk.[N]	P30101	PDIA3	0.721563	0.569812	0.547592	0.682002	0.723513	0.799928	1.66475	1.58857	1.29446	1.40782
[A].sDVLELTDDNFESR.[I]	P30101	PDIA3	0.473924	0.504815	0.422796	0.709843	0.777263	0.778749	2.10268	1.59579	1.20854	1.42561
[K].kFAETQPkkDTPR.[K]	P26641-2	EEF1G	1.02337	0.670943	0.765572	1.10832	1.03501	0.914787	1.24107	1.10699	1.04155	1.09238
[F].aETQPkkDTPR.[K]	P26641-2	EEF1G	1.19851	0.756533	0.86276	1.18523	1.10607	0.921294	1.07714	0.961386	0.940847	0.990229
[Y].yVSNEELR.[G]	P26641-2	EEF1G	0.724016	0.538988	0.616649	0.850599	0.959148	0.739186	1.74507	1.40423	1.09132	1.33079
[K].skDDQVTVIGAGVTLHEALAAAELLk.[K]	P29401-2	TKT	1.05062	1.17409	0.875365	1.12397	0.943588	1.17675	0.792144	1.0053	0.919877	0.938299
[R].vLDPFTIkPLDR.[K]	P29401-2	TKT	0.854886	0.709567	0.885907	1.17757	1.04644	0.743116	1.261	1.21338	0.992953	1.11518
[R].sVPTSTVFYPSDGVATEk.[A]	P29401-2	TKT	0.750604	0.615647	0.612288	0.943916	1.03995	0.524763	1.68951	1.44343	1.03019	1.3497
[L].aTPPqEDAPSVDIANIR.[M]	P29401-2	TKT	0.687483	0.572604	0.610175	0.838139	0.925194	0.839673	1.59467	1.48245	1.08858	1.36103
[F].yPSDGVATEk.[A]	P29401-2	TKT	0.233855	0.233086	0.256555	0.366693	0.544158	0.622134	2.1792	2.16404	1.43401	1.96626
[V].fYPSDGVATEk.[A]	P29401-2	TKT	0.468693	0.38927	0.454888	0.653534	0.820556	0.80951	1.77368	1.64182	1.34793	1.64012
[T].vFYPSDGVATEk.[A]	P29401-2	TKT	0.841182	1.16352	1.14084	1.07184	1.81876	0.708013	0.891794	0.903519	0.749482	0.711047
[K].lVLVGDGGTGkTT.[F]	P62826	RAN	0.962056	1.07857	1.29511	1.52715	1.64344	0.494768	0.927635	0.732565	0.615392	0.723322
[K].lVLVGDGGTGk.[T]	P62826	RAN	1.70558	0.870247	1.1099	1.52247	1.23605	0.509883	0.959404	0.795548	0.591768	0.69915
[W].dTAGqEkFGGLR.[D]	P62826	RAN	0.49515	0.757523	0.830671	0.978059	1.26911	0.609145	1.67514	1.25498	0.888399	1.24183
[T].tALPDEDDDL.[-]	P62826	RAN	0.829845	0.710675	0.720506	0.991727	1.12823	0.831489	1.4377	1.19809	1.02801	1.12372
[Q].gEPqVqFk.[L]	P62826	RAN	0.970473	0.951949	1.02607	1.4085	1.40117	0.590243	1.16468	0.92334	0.711163	0.852419
[T].aLPDEDDDL.[-]	P62826	RAN	1.00236	0.724678	0.705182	1.09738	0.960878	0.934551	1.29315	1.15422	0.971537	1.15606
[C].gNkVDIkDR.[K]	P62826	RAN	1.75813	1.2233	0.795411	2.24162	1.24262	0.489471	0.786577	0.51487	0.440741	0.50726
[A].qTTALPDEDDDL.[-]	P62826	RAN	1.11969	0.99782	0.816805	1.0479	1.28921	0.790012	1.1652	1.05485	0.802019	0.916485
[L].sEPAPVPPIPNEqqLAR.[L]	Q99627-1	COPS8	0.704631	0.632009	0.662051	0.924917	1.06809	0.744725	1.59351	1.36803	0.985902	1.31614
[Q].vETISPGDGR.[T]	P62942	FKBP1A	0.281834	0.234405	0.236518	0.356787	0.480821	0.873322	2.29537	2.03066	1.45503	1.75526
[M].gVqVETISPGDGR.[T]	P62942	FKBP1A	0.661707	0.675866	0.711245	0.887715	1.21299	0.858787	1.47721	1.23612	1.03295	1.24539
[V].qLPTGLTGIk.[V]	P34932	HSPA4	0.742293	0.687894	0.810101	0.916906	1.24168	0.901158	1.53933	1.42503	0.804276	0.931338
[Y].kqDLPALEEkPR.[N]	P34932	HSPA4	0.765536	0.720177	0.747861	0.671149	1.0374	0.697714	1.57175	1.3609	1.18799	1.23952
[M].qDkLEkER.[N]	O95757	HSPA4L	0.586098	0.435305	0.467796	0.65055	1.183	0.940945	1.80992	1.38378	1.24578	1.29683
[Q].gTDTAVPSDSDkkLPEMDID.[-]	P34932	HSPA4	0.825813	0.668161	0.541762	1.04745	0.960409	1.23723	0.865702	1.18715	1.25495	1.41137
[E].tIANEYSDR.[C]	O95757	HSPA4L	0.652209	0.486263	0.635154	0.777434	0.934581	0.713599	1.83936	1.52078	1.07681	1.36381
[K].fVSEDDRNSFTLk.[L]	P34932	HSPA4	0.692756	0.502832	0.585787	0.829024	0.911675	0.700704	1.7693	1.37325	1.22946	1.40521
[T].aVPSDSDkkLPEMDID.[-]	P34932	HSPA4	1.3996	0.766822	0.619455	1.2994	0.983782	1.30153	0.553275	0.843615	1.06046	1.17206
[K].tSTVDLPIENq.[L]	P34932	HSPA4	0.775124	0.559085	0.675055	0.941082	0.965031	0.846322	1.63784	1.33147	0.982051	1.28694
[L].nADEAVTR.[G]	P34932	HSPA4	0.636075	1.11458	0.648829	1.82772	1.44733	0.58358	1.22488	0.967486	0.67541	0.874098
[Q].tEETQPSETkEVEPEPTEDkDLEADEEDTR.[K]	P20042	EIF2S2	0.546117	0.43315	0.481069	0.675244	0.569502	0.8636	2.17036	1.58539	1.30415	1.37143
[K].eVEPEPTEDkDLEADEEDTR.[K]	P20042	EIF2S2	0.579226	0.35797	0.40208	0.544084	0.580274	0.64154	2.85053	1.60119	1.11565	1.32746
[A].sPcPAVTPSAPSAALPDEGSR.[H]	Q9C0C2	TNKS1BP1	0.685355	0.641855	0.563545	0.992344	1.0683	0.832094	1.78797	1.29507	0.898432	1.23503
[S].lLVPVGPRPPR.[G]	Q9C0C2	TNKS1BP1	0.596262	0.502002	0.502163	0.76499	0.855508	0.77169	1.90542	1.4967	1.19231	1.41296
[R].aLPAkPALPAkPS.[L]	Q9C0C2	TNKS1BP1	0.452983	0.365968	0.375263	0.544196	0.646893	0.573934	2.75757	1.83277	1.14961	1.30081
[T].qETGkEEAGkEEPPPLTPPAR.[C]	Q9C0C2	TNKS1BP1	0.599611	0.49936	0.537766	0.713179	0.816344	0.839645	1.88822	1.55209	1.19251	1.36127
[T].tVEEILAk.[M]	Q9C0C2	TNKS1BP1	0.870536	0.619866	0.737502	1.0222	0.924457	0.803234	1.54742	1.29666	0.998857	1.17927
[E].lVPTGSEPGDTR.[A]	Q9C0C2	TNKS1BP1	0.691604	0.62773	0.707006	0.886679	0.928829	0.754488	1.67166	1.34285	1.09214	1.29703
[R].dSLLqDGEFSMDLR.[T]	P07737	PFN1	0.746386	0.660724	0.664304	0.916907	1.01899	0.792343	1.38877	1.33323	1.14277	1.33558
[Q].vVITDPEkLDQIR.[Q]	P17987	TCP1	0.638189	0.671345	0.504899	0.958883	0.818579	0.982616	1.35105	1.38596	1.24761	1.44086
[A].aqDSTDLVAk.[L]	P17987	TCP1	0.723776	0.49259	0.597496	0.779668	0.857871	0.896361	1.6301	1.43367	1.19015	1.39831
[A].qDSTDLVAk.[L]	P17987	TCP1	0.738581	0.560584	0.668904	0.766508	0.934255	0.892274	1.59664	1.4168	1.12143	1.30402
[L].dLSnGkPR.[D]	P17987	TCP1	0.549602	0.461287	0.597821	0.825042	1.0057	0.943419	1.8151	1.46668	1.08039	1.25496
[Q].dSTDLVAk.[L]	P17987	TCP1	0.591201	0.583007	0.469211	0.75069	0.829297	0.653045	1.95307	1.65719	1.08275	1.43054
[N].aAQDSTDLVAk.[L]	P17987	TCP1	0.86838	0.675509	0.745091	0.858554	1.14482	0.733853	1.58392	1.28222	0.949549	1.1581
[F].iDELDAIAPkR.[E]	P55072	VCP	0.497012	0.445877	0.522314	0.560578	0.935056	0.746315	2.31715	1.59127	1.08438	1.30005
[L].iYIPLPDEkSR.[V]	P55072	VCP	0.904183	0.63863	0.785186	0.979127	1.21166	0.726087	1.50032	1.25874	0.892131	1.10393
[E].eDDPVPEIR.[R]	P55072	VCP	0.447771	0.438812	0.413913	0.565793	0.766998	0.722365	2.14008	1.77125	1.17364	1.55938
[M].eVEEDDPVPEIR.[R]	P55072	VCP	0.830906	0.697715	0.790228	0.866688	1.03172	0.993401	1.44537	1.24736	1.02396	1.07265
[Y].iPLPDEkSR.[V]	P55072	VCP	0.897893	0.499812	0.673169	0.912942	0.90932	0.831647	1.66108	1.3752	1.03167	1.20728
[R].sVSDNDIR.[K]	P55072	VCP	0.787874	0.533151	0.632676	0.832367	0.972664	0.744337	1.8724	1.3739	1.01744	1.23319
[Y].tEDnDDDLYG.[-]	P55072	VCP	0.828452	0.728809	0.709698	1.00826	1.21295	0.667881	1.60033	1.20672	0.922354	1.11455
[R].eSIESEIR.[R]	P55072	VCP	0.689617	0.49316	0.542631	0.749573	0.889679	0.755717	1.94261	1.45139	1.09754	1.38809
[Q].eIFqDNHEDGPTAk.[K]	P13010	XRCC5	0.524114	0.626836	0.645497	0.790414	0.898767	0.577989	2.01737	1.54441	1.04892	1.32567
[T].sVGSVnPAENFR.[V]	P13010	XRCC5	0.660364	0.725952	0.700491	0.919026	1.09884	0.623652	1.81953	1.37315	0.960378	1.11862
[M].lNPPAEVTTk.[S]	P13010	XRCC5	0.765414	0.862819	1.05579	1.2683	1.37814	0.682027	1.20685	1.02353	0.805567	0.95156
[D].nHEDGPTAk.[K]	P13010	XRCC5	1.57455	1.09787	1.37741	1.913	1.81558	0.368645	0.658904	0.403439	0.386437	0.404157
[N].hEDGPTAk.[K]	P13010	XRCC5	0.891701	0.733101	0.818378	1.12237	1.00161	0.753549	1.53124	1.1644	0.887688	1.09597
[L].fPLIEAk.[K]	P13010	XRCC5	1.09281	0.516132	0.803906	1.08988	0.976949	0.799754	1.31407	1.14861	1.02994	1.22795
[R].gFGFVTYATVEEVDAAMNAR.[P]	P09651-1	HNRNPA1	0.631934	0.675718	0.780763	0.856066	0.842466	0.624599	1.29379	1.49278	1.32221	1.47967
[K].lFIGGLSFETTDESLR.[S]	P09651-1	HNRNPA1	0.857676	0.751394	0.585772	0.723019	0.827717	0.740491	1.6241	1.63261	0.945744	1.31148
[R].gFAFVTFDDHDSVDk.[I]	P09651-1	HNRNPA1	0.630836	0.650566	0.568153	0.740134	1.01517	0.781483	1.69024	1.59421	1.05011	1.27909
[R].gGFGGSR.[G]	P09651-1	HNRNPA1	0.666183	0.541963	0.687543	0.92292	0.886221	0.781553	1.79312	1.36377	1.05613	1.3006
[E].vGADDDEGGAER.[G]	Q6NZI2-1	CAVIN1	0.473948	0.32338	0.394386	0.533353	0.621759	0.614851	2.87196	1.81259	1.05191	1.30186
[G].aDDDEGGAER.[G]	Q6NZI2-1	CAVIN1	0.431187	0.31656	0.318881	0.517352	0.481778	0.680466	2.59747	1.83367	1.23751	1.58513
[T].eMVEVGADDDEGGAER.[G]	Q6NZI2-1	CAVIN1	0.55134	0.476214	0.556455	0.669537	0.833034	0.595115	2.16375	1.59508	1.10688	1.4526
[Q].aAEEPSGAGSEELIk.[S]	Q6NZI2-1	CAVIN1	0.716122	0.550068	0.566671	0.85001	0.937421	0.74243	1.80023	1.57217	1.01244	1.25244
[L].eVNEAELLR.[R]	Q6NZI2-1	CAVIN1	0.574119	0.455049	0.481246	0.736137	0.761207	0.761596	2.0152	1.66005	1.08436	1.47104
[A].eEPSGAGSEELIk.[S]	Q6NZI2-1	CAVIN1	0.618545	0.558552	0.592211	0.825063	0.99016	0.686576	1.9549	1.43172	1.06566	1.27661
[M].vNPTVFFDIAVDGEPLGR.[V]	P62937	PPIA	0.794808	0.942102	0.807821	0.844618	1.15477	1.04158	1.10976	1.14273	1.03125	1.13056
[K].fEDENFILk.[H]	P62937	PPIA	0.193063	0.173819	0.173652	0.31305	0.330119	0.678542	2.79855	2.15245	1.45489	1.73186
[E].kFEDENFILk.[H]	P62937	PPIA	0.562445	0.484393	1.23588	0.773106	1.26553	0.851245	1.46801	1.32108	0.966003	1.0723
[F].dIAVDGEPLGR.[V]	P62937	PPIA	0.397621	0.339579	0.351746	0.525563	0.684791	0.671651	2.56263	1.91827	1.09437	1.45377
[R].vSFELFADk.[V]	P62937	PPIA	0.965229	0.77252	0.69753	1.00406	1.1541	0.92451	1.01751	1.08668	1.25176	1.1261
[F].eDEnFILk.[H]	P62937	PPIA	0.49118	0.448404	0.630831	0.606194	0.826873	0.8004	1.97713	1.67327	1.17443	1.37129
[K].kITIADcGQLE.[-]	P62937	PPIA	0.698625	0.609053	0.594766	0.943874	0.884158	0.915768	1.23596	1.44477	1.13293	1.54009
[A].vDGEPLGR.[V]	P62937	PPIA	0.608448	0.729302	0.647	0.724677	0.963835	0.678466	1.98718	1.43923	1.03827	1.18359
[M].vGVkPVGSDPDFQPELSGAGSR.[L]	O43396	TXNL1	0.452584	0.544053	0.392933	0.618875	0.664907	0.998519	1.73985	1.61497	1.39089	1.58241
[R].iEIESFYEGEDFSETLTR.[A]	P11021	HSPA5	0.542504	0.540354	0.492095	0.60747	0.691972	0.749935	1.74147	1.78092	1.32749	1.52579
[S].aGPPPTGEEDTAEkDEL.[-]	P11021	HSPA5	0.870437	0.67729	0.670532	0.939344	0.992219	1.12077	1.26899	1.17381	1.07015	1.21647
[S].yVAFTPEGER.[L]	P11021	HSPA5	0.5086	0.397491	0.484935	0.63373	0.813129	0.691629	2.3522	1.5799	1.05675	1.48164
[A].gPPPTGEEDTAEkDEL.[-]	P11021	HSPA5	0.833614	0.710719	0.618403	1.02017	1.00723	0.895965	1.39939	1.24826	1.0724	1.19385
[L].qGGEGQAPTR.[Q]	P24752	ACAT1	0.433599	0.419783	0.384024	0.517375	0.582792	0.893783	2.07493	1.83583	1.23487	1.623
[K].gqPDVVVkEDEEYkR.[V]	P24752	ACAT1	0.351968	0.402002	0.466893	0.57974	0.803887	0.815057	1.96405	1.68446	1.26853	1.66342
[T].vkGQPDVVVkEDEEYkR.[V]	P24752	ACAT1	0.583178	0.401912	0.444026	0.652303	0.68761	0.918736	1.78221	1.65262	1.31882	1.55859
[Q].hHQGPPPGGPGGR.[S]	P23246-1	SFPQ	0.975969	0.825962	0.937653	0.936448	1.03118	0.814876	1.49546	1.09107	0.935507	0.955872
[R].fGqGGAGPVGGqGPR.[G]	P23246-1	SFPQ	0.598702	0.516022	0.472936	0.735828	0.787077	0.609233	2.53	1.54979	1.0257	1.17471
[R].eEYEGPNkkPR.[F]	P23246-1	SFPQ	0.900488	0.557373	0.993094	0.976665	0.918738	0.660756	1.53337	1.21712	1.03651	1.20588
[M].gPGTPAGYGR.[G]	P23246-1	SFPQ	0.768595	0.689771	0.751627	1.02951	0.98844	0.706923	1.72826	1.28004	0.902277	1.15456
[L].vPVTPEVkPkR.[T]	P82970	HMGN5	0.663091	0.363039	0.375509	0.704884	0.582237	0.934257	1.70715	1.62098	1.38337	1.66548
[M].lVPVTPEVkPkR.[T]	P82970	HMGN5	0.58395	0.394473	0.485488	0.677517	0.729667	1.04402	1.48389	1.50102	1.42072	1.67925
[L].vPVTPEVkPk.[R]	P82970	HMGN5	0.514233	0.429667	0.464819	0.616104	0.765555	0.762381	1.99395	1.6875	1.29672	1.46907
[T].eAPASEkEIVEVk.[E]	P82970	HMGN5	0.535164	0.353411	0.401573	0.583053	0.567566	1.35912	1.66934	1.50659	1.44555	1.57864
[M].lVPVTPEVkPk.[R]	P82970	HMGN5	0.501228	0.329247	0.432729	0.556	0.71227	0.838787	1.8183	1.70164	1.38201	1.72779
[R].nkDqEVNFQEYVTFLGA.[L]	P06703	S100A6	0.355829	0.318414	0.312867	0.431782	0.516862	0.80727	1.73867	1.91786	1.69896	1.90148
[R].nkDQEVNFQEYVTF.[L]	P06703	S100A6	0.481087	0.454986	0.449767	0.65589	0.764953	0.76011	1.79773	1.69211	1.39954	1.54383
[L].aLIYNEALkG.[-]	P06703	S100A6	0.786491	0.551455	0.509727	0.799493	0.822362	0.879103	1.68841	1.40414	1.09407	1.46475
[L].iYNEALkG.[-]	P06703	S100A6	0.373912	0.32091	0.338576	0.437377	0.512909	1.52317	1.97818	1.65903	1.40151	1.45442
[A].aPEkPLAGk.[K]	Q02539	HIST1H1A	0.487911	0.355027	0.384017	0.562394	0.692589	0.47709	2.93432	1.78703	1.01899	1.30063
[Q].sVEIPGGGTEGYHVLR.[V]	Q9H8Y8-1	GORASP2	0.852968	0.715694	0.711546	0.882114	1.07323	0.791806	1.58864	1.24567	0.962356	1.17599
[L].tVDVTPPTAkAPTTVEDR.[V]	Q9H8Y8-1	GORASP2	0.65834	0.614245	0.549216	0.783543	1.06034	0.762189	1.68558	1.4808	1.14044	1.26532
[T].vDVTPPTAkAPTTVEDR.[V]	Q9H8Y8-1	GORASP2	0.909521	0.656356	0.746793	0.974818	1.09552	0.724341	1.59005	1.208	0.887817	1.20677
[R].eHEkEVLQk.[A]	P16949-1	STMN1	0.960008	0.681163	0.770605	1.01201	1.21336	0.804264	1.5053	1.10575	0.912408	1.03513
[M].aEEkLTHk.[M]	P16949-1	STMN1	0.842338	0.705565	0.739375	1.06635	1.23007	0.908528	1.15225	1.08281	1.0753	1.19742
[K].aIEEnNNFSkm.[A]	P16949-1	STMN1	0.934205	0.818764	0.82518	1.13768	1.28793	0.834974	1.27855	1.02537	0.872086	0.985271
[L].kQLAEkR.[E]	P16949-1	STMN1	0.674152	0.780021	0.859565	1.19136	1.31527	0.923717	1.11222	1.04848	1.01449	1.08072
[R].ekDkHIEEVR.[K]	P16949-1	STMN1	0.259537	0.299534	0.39171	0.563352	0.747124	0.63597	2.54492	1.68885	1.35118	1.51783
[R].dAGYEFDIcFTSVqk.[R]	P18669	PGAM1	0.768247	0.85865	0.724189	0.851605	1.06233	0.809135	1.0124	1.22435	1.27617	1.41293
[W].yDADLSPAGHEEAkR.[G]	P18669	PGAM1	0.636511	0.566818	0.586615	0.850631	0.929916	0.817819	1.84264	1.40914	1.07994	1.27997
[M].qFLGDEETVR.[K]	P18669	PGAM1	0.691411	0.592803	0.68439	0.804875	1.00691	0.824735	1.69733	1.41763	1.01132	1.26859
[Q].fLGDEETVR.[K]	P18669	PGAM1	0.429335	0.316259	0.371747	0.55397	0.525548	0.700519	2.59297	1.83595	1.17402	1.49969
[F].lGDEETVR.[K]	P18669	PGAM1	0.78659	0.476864	0.470646	0.797195	0.753492	0.696714	2.07482	1.54829	1.06868	1.32671
[K].kVAPAPAVVkkQ.[E]	P62424	RPL7A	0.494356	0.368289	0.440574	0.547405	0.618571	0.595307	2.60184	1.67153	1.18469	1.47744
[K].kVVNPLFEkR.[P]	P62424	RPL7A	0.501518	0.362696	0.470767	0.596461	0.798352	0.533024	2.61626	1.6821	1.0836	1.35523
[K].vAPAPAVVkkq.[E]	P62424	RPL7A	0.419528	0.450191	0.51399	0.614928	0.790835	0.618133	2.49962	1.62616	1.14523	1.32138
[A].lFSGDTGEIk.[S]	Q9Y230	RUVBL2	1.29529	0.807683	0.835046	1.14846	1.05121	0.677473	1.2608	1.08942	0.856975	0.977655
[R].gLGLDDALEPR.[Q]	Q9Y230	RUVBL2	0.617309	0.529248	0.620522	0.869013	0.97138	0.719401	1.92579	1.51811	0.971066	1.25816
[L].gLDDALEPR.[Q]	Q9Y230	RUVBL2	0.684215	0.668368	0.65281	0.934707	1.00659	0.792814	1.54695	1.3419	0.993904	1.37773
[V].sLHEIDVINSR.[T]	Q9Y230	RUVBL2	1.09089	0.577875	0.730078	1.06774	1.03915	0.899704	1.47321	1.20972	0.886976	1.02466
[L].fSGDTGEIk.[S]	Q9Y230	RUVBL2	1.05335	0.669236	0.743421	0.990365	1.04088	0.819223	1.40663	1.20396	0.947113	1.12582
[K].fVqcPDGELqkR.[K]	Q9Y230	RUVBL2	0.766878	0.535872	0.638835	0.876415	0.90956	0.811793	1.64277	1.434	1.0874	1.29648
[T].aTTkVPEIR.[D]	Q9Y230	RUVBL2	0.600646	0.816977	0.785424	1.19875	1.04627	1.06033	1.03978	1.11367	1.01021	1.32794
[F].sGDTGEIk.[S]	Q9Y230	RUVBL2	0.566962	0.41621	0.452093	0.650463	0.682014	0.895388	1.91613	1.69465	1.23451	1.49158
[M].gSqTkFVqcPDGELQkR.[K]	Q9Y230	RUVBL2	0.590818	0.639264	0.658039	0.85008	0.931061	0.983308	1.36985	1.45038	1.21586	1.31133
[M].pDPAkSAPAPkk.[G]	Q5QNW6-2	HIST2H2BF	0.473848	0.431624	0.646816	0.539742	1.2244	0.424394	2.71599	1.51034	0.982067	1.05078
[M].pDPAkSAPAPk.[K]	Q5QNW6-2	HIST2H2BF	0.348719	0.281455	0.363637	0.43552	0.667181	0.463204	3.78858	1.68723	0.954854	1.00962
[M].pDPAkSAPAPkkGSk.[K]	Q5QNW6-2	HIST2H2BF	0.371349	0.307312	0.419029	0.435983	0.685108	0.413418	3.21962	1.80619	1.15338	1.18861
[G].vEGLIDIENPNR.[V]	Q13442	PDAP1	0.527342	0.508057	0.542121	0.707201	0.947688	0.508862	2.45664	1.54106	1.02271	1.23832
[T].qLDLDGPkELSR.[R]	Q13442	PDAP1	0.683321	0.701183	0.607227	0.792013	1.05488	0.767885	1.80037	1.38033	1.05293	1.15986
[R].qYTSPEEIDAQ.[L]	Q13442	PDAP1	0.7141	0.691329	0.685984	0.899116	1.04945	0.736446	1.7008	1.33362	0.980001	1.20915
[L].iDIENPNR.[V]	Q13442	PDAP1	1.12378	0.820852	0.79815	1.1903	1.10373	0.744143	1.27809	1.05683	0.914898	0.969222
[Q].lQAEkQkAR.[E]	Q13442	PDAP1	0.518042	0.551133	0.690543	0.815131	1.05195	0.56975	2.00416	1.43302	1.06129	1.30499
[D].lDGPkELSR.[R]	Q13442	PDAP1	0.805811	0.989671	0.824322	0.975255	1.17542	0.670307	1.63702	1.14992	0.831743	0.940536
[L].dLDGPkELSR.[R]	Q13442	PDAP1	0.675093	0.775863	0.74193	0.823775	1.03289	0.807472	1.59396	1.3673	1.01036	1.17137
[A].aPAEEkkVEAk.[K]	P05386	RPLP1	0.149704	0.114204	0.133385	0.187408	0.297696	0.734661	2.94323	2.1676	1.43459	1.83753
[A].aAPAEEkkVEAk.[K]	P05386	RPLP1	0.566564	0.462756	0.641853	0.652703	1.02304	0.946958	1.77022	1.38942	1.18679	1.35969
[T].aAAPAEEkkVEAk.[K]	P05386	RPLP1	0.602489	0.679311	0.785958	0.757278	1.18854	0.714344	1.86411	1.33994	0.986217	1.08181
[K].kEESEESDDDmGFGL.[F]	P05386	RPLP1	0.671135	0.587422	0.67332	0.897248	1.09303	0.811388	1.5632	1.29966	1.08872	1.31489
[L].qTSSVLVSGLR.[G]	P22314	UBA1	0.711107	0.54467	0.640056	0.8747	0.9574	0.870679	1.75313	1.3343	1.06064	1.25332
[N].gSEADIDEGLYSR.[Q]	P22314	UBA1	0.816745	0.928512	0.781161	1.07634	1.25999	0.781355	1.2264	1.12848	0.898636	1.10238
[A].dIDEGLYSR.[Q]	P22314	UBA1	0.817834	0.663324	0.750575	1.03159	1.05118	0.809899	1.43555	1.27082	0.989334	1.1799
[A].nASVDDSR.[L]	P22314	UBA1	0.609069	0.66987	0.594535	0.9341	0.965473	0.805366	1.55009	1.44072	1.18479	1.24599
[F].sEPLAAPR.[H]	P22314	UBA1	0.736291	0.52005	0.639394	0.839624	0.993444	0.809098	1.79361	1.33406	1.00437	1.33006
[G].sSSSSGEGTQPSR.[T]	Q9UHD9	UBQLN2	0.595674	0.564602	0.55042	0.720634	1.01715	0.714623	1.73707	1.52293	1.1095	1.4674
[S].sSSGEGTQPSR.[T]	Q9UHD9	UBQLN2	0.607477	0.512843	0.496	0.74612	0.950896	0.794304	1.89275	1.54063	1.09316	1.36582
[S].sSGEGTqPSR.[T]	Q9UHD9	UBQLN2	0.623838	0.521416	0.527244	0.721074	0.902143	0.886265	1.74641	1.44458	1.19144	1.43559
[R].lLQDSVDFSLADAINTEFk.[N]	P08670	VIM	0.510332	0.476499	0.431548	0.595557	0.608238	0.675609	1.91551	1.92752	1.30871	1.55048
[K].fADLSEAANR.[N]	P08670	VIM	0.413525	0.341685	0.402729	0.491015	0.60261	0.653262	2.57996	1.87162	1.16567	1.47792
[T].nLDSLPLVDTHSkR.[T]	P08670	VIM	0.768895	0.455602	0.473909	0.768823	0.710927	0.84733	1.86667	1.58334	1.14144	1.38306
[D].sLPLVDTHSk.[R]	P08670	VIM	0.953786	0.654847	0.744244	0.945345	0.900997	0.672013	1.83978	1.2532	0.954425	1.08136
[K].nLqEAEEWYkSk.[FY]	P08670	VIM	0.420221	0.423621	0.382066	0.474137	0.645631	1.19042	1.97301	1.74057	1.37338	1.37695
[KNQ].eEIAFLk.[HKL]	P08670	VIM	0.448011	0.333589	0.376732	0.520851	0.632329	0.735333	2.24347	1.79466	1.19032	1.7247
[K].gDVAEGDLIEHF.[S]	Q13151	HNRNPA0	0.753261	0.714554	0.639413	0.928004	1.0871	0.807141	1.55215	1.26013	1.0157	1.24255
[K].aVPkEDIYSGGGGGGSR.[S]	Q13151	HNRNPA0	0.808195	0.782711	0.808851	0.926959	1.02519	0.595908	1.65856	1.22897	0.934283	1.23037
[A].eIIADkQSGkk.[R]	Q13151	HNRNPA0	0.37918	0.490655	0.393465	0.753359	0.7819	0.586321	2.4915	1.63266	1.15202	1.33894
[H].aVDGNTVELk.[R]	Q13151	HNRNPA0	0.671967	0.595986	0.721084	0.798573	1.03707	0.794627	1.6383	1.38599	1.06327	1.29313
[A].eIIADkqSGkkR.[G]	Q13151	HNRNPA0	0.781238	0.715265	0.812234	0.891741	1.14014	0.655245	1.623	1.26109	0.969447	1.15059
[F].aSGANFEYIIAEkR.[G]	P30084	ECHS1	0.875681	1.03036	0.987545	1.30111	1.52176	0.598039	0.98913	1.01212	0.764676	0.919572
[L].qAEAPHIVVGTPGR.[V]	Q14240-2	EIF4A2	0.896716	0.770836	1.0519	1.13822	1.41504	0.592634	1.44824	1.02022	0.769487	0.896703
[Y].tVPLEkDNSEEFR.[Q]	Q8WWM7-3	ATXN2L	0.850012	0.759424	0.760689	0.89362	1.13935	0.747011	1.43933	1.2903	0.965811	1.15445
[L].sSPSNRPSGETSVPPPPAVGR.[M]	Q8WWM7-3	ATXN2L	0.761875	0.565509	0.665736	0.831748	0.939775	0.914494	1.52497	1.32683	1.18718	1.28188
[A].gkVPGLqNEqkR.[F]	Q8WWM7-3	ATXN2L	0.943924	0.718949	0.767146	1.09406	1.14652	0.718087	1.42616	1.13827	0.908369	1.13852
[F].nEENYGVk.[T]	Q8WWM7-3	ATXN2L	0.895937	0.88247	0.764996	0.937691	1.16799	0.812322	1.25201	1.18851	1.00331	1.09476
[K].tEFLSFmNTELAAFTk.[N]	P31949	S100A11	0.860129	0.863243	0.706218	0.956202	0.966225	1.02271	0.757843	1.0766	1.35508	1.43575
[F].tkNqkDPGVLDR.[M]	P31949	S100A11	0.512208	0.473345	0.527839	0.631678	1.06049	1.32951	1.34509	1.29328	1.43747	1.38909
[Q].qTTNTVEEPLDLIR.[L]	P62310	LSM3	0.699785	0.592178	0.648451	0.898934	1.03607	0.831624	1.62317	1.29848	1.05784	1.31348
[N].tVEEPLDLIR.[L]	P62310	LSM3	0.938126	0.753247	0.742953	1.00139	1.18119	0.791958	1.38121	1.18943	0.922535	1.09796
[T].nTVEEPLDLIR.[L]	P62310	LSM3	0.707259	0.700856	0.625829	0.888821	1.0427	0.707781	1.60956	1.32184	1.14549	1.24986
[E].tTEDLVAkLk.[E]	P38117-2	ETFB	0.57803	0.920817	0.861089	0.864744	1.47926	0.720154	1.26909	1.24094	0.963558	1.10231
[Q].vTLEGDkLkVER.[E]	P38117-2	ETFB	0.744261	0.667545	0.70138	0.778435	1.14497	0.623808	1.79036	1.41345	0.92371	1.21208
[K].vETTEDLVAk.[L]	P38117-2	ETFB	0.958739	0.799737	0.870934	1.01265	1.23553	0.756986	1.40969	1.10389	0.84519	1.00666
[L].sVISVEDPPqR.[T]	P38117-2	ETFB	0.655001	0.716213	0.720957	0.798747	1.04893	0.79199	1.70145	1.36134	0.988711	1.21667
[C].gPAqcqETIR.[T]	P38117-2	ETFB	0.753465	0.536939	0.579237	0.816713	0.862423	0.70766	1.83401	1.55987	0.999298	1.35039
[T].lEGDkLkVER.[E]	P38117-2	ETFB	0.392626	0.318601	0.431051	0.522829	0.703503	0.626386	2.24331	1.86912	1.26529	1.62728
[K].gLGTDEDTLIEILASR.[T]	P04083	ANXA1	0.570096	0.465836	0.342533	0.533169	0.877529	1.20637	1.61495	1.63197	1.27639	1.48116
[K].vLDLELkGDIEk.[C]	P04083	ANXA1	0.314023	0.298412	0.32045	0.391004	0.472482	1.18291	1.70031	1.74335	1.64743	1.92962
[K].qAWFIENEEqEYVQTVk.[S]	P04083	ANXA1	0.257333	0.281628	0.255992	0.391362	0.288027	1.21269	1.66544	1.75514	1.89789	1.99449
[N].eDLADSDAR.[A]	P04083	ANXA1	0.509163	0.427778	0.519081	0.63832	0.646933	1.35395	1.61597	1.52003	1.25329	1.51549
[A].dAPEEEDHVLVLR.[K]	P07237	P4HB	0.604174	0.705484	0.536409	0.874289	1.01787	0.726317	1.69561	1.39956	1.08363	1.35667
[R].tGPAATTLPDGAAAESLVESSEVAVIGFFk.[D]	P07237	P4HB	0.833814	0.829296	0.796641	1.09294	1.00972	0.938732	1.19633	1.14407	1.06742	1.09103
[K].sVSDYDGkLS.[N]	P07237	P4HB	0.450869	0.389531	0.387259	0.542364	0.732272	1.09311	2.04715	1.59712	1.22541	1.53493
[M].pFLELDTNLPANR.[V]	A6NHG4	DDTL	0.563959	0.588291	0.444631	0.716422	0.860056	0.920747	1.71813	1.46893	1.37232	1.34651
[F].lELDTNLPANR.[V]	A6NHG4	DDTL	0.61498	0.524338	0.529699	0.768656	0.891772	0.82646	1.94166	1.45358	1.10343	1.34543
[L].eLDTNLPANR.[V]	A6NHG4	DDTL	0.756195	0.685588	0.699548	0.91601	0.998832	0.773323	1.67398	1.3275	0.981544	1.18747
[T].aTEVAPPPPPVEVPIR.[K]	Q14839-2	CHD4	0.862678	0.686866	0.853423	1.01257	0.894463	0.721592	1.54467	1.26573	0.906456	1.25156
[E].vAPPPPPVEVPIR.[K]	Q14839-2	CHD4	0.768134	0.660516	0.844801	1.00319	1.20035	0.716914	1.48397	1.19649	1.0105	1.11515
[T].eVAPPPPPVEVPIR.[K]	Q14839-2	CHD4	0.908433	0.788871	0.879377	1.09687	1.12408	0.648544	1.53369	1.15091	0.79891	1.07032
[K].eGcEAIVDTGTSLMVGPVDEVR.[E]	P07339	CTSD	0.727358	0.708671	0.713808	0.981182	1.0856	0.733808	1.27661	1.44566	1.03676	1.29055
[A].sALGGVkVER.[Q]	P07339	CTSD	1.62825	0.859682	0.863939	1.62873	1.31264	0.548607	1.00361	0.756262	0.631507	0.766777
[S].aLGGVkVER.[Q]	P07339	CTSD	1.05927	0.705372	0.86978	1.11874	1.17417	0.658801	1.44655	1.15691	0.854529	0.955873
[A].lGGVkVER.[Q]	P07339	CTSD	0.838688	0.706242	0.664372	1.08088	1.39518	0.582365	1.6549	1.22209	0.893236	0.962057
[F].gGAGGHAPGVAR.[K]	P52272	HNRNPM	0.799129	0.807495	0.757181	1.03907	1.11479	0.88257	1.42926	1.1699	0.947514	1.05308
[Q].gGGGGGGSVPGIER.[M]	P52272	HNRNPM	0.606728	0.484164	0.637902	0.847709	0.78122	0.657049	2.10651	1.54377	0.99311	1.34183
[G].gGGGGSVPGIER.[M]	P52272	HNRNPM	0.793374	0.584948	0.709362	0.936948	0.974805	0.634737	1.82126	1.41937	0.928512	1.19668
[F].sVVADTPELQR.[I]	Q14847	LASP1	0.57563	0.723013	0.706205	0.889409	1.21749	0.651028	1.65275	1.34565	0.997916	1.24092
[T].qDqISNIk.[Y]	Q14847	LASP1	1.05162	0.753204	0.742742	1.04096	1.01862	0.782888	1.36744	1.16406	0.944647	1.13382
[V].aDTPENLR.[L]	Q14847	LASP1	0.794486	0.903162	0.896439	1.121	1.46173	0.494671	1.49429	1.07578	0.754345	1.0041
[MT].vADTPEnLR.[L]	Q14847	LASP1	0.789237	0.683372	0.667695	1.0131	1.1008	0.663534	1.53653	1.30046	1.02484	1.22043
[R].sAPGGGGkR.[Y]	Q14847	LASP1	0.885986	0.757642	0.712849	1.11696	1.30046	0.573335	1.84823	1.10189	0.758695	0.943952
[S].gGEGMEPER.[R]	Q14847	LASP1	0.844121	0.585025	0.602309	0.964912	0.902781	0.866864	1.59894	1.30044	1.03748	1.29714
[Q].sSPAEPkSEDADR.[C]	Q32MZ4	LRRFIP1	0.531475	0.520464	0.503366	0.687987	0.848886	0.728097	2.14397	1.5398	1.1189	1.37705
[N].sLENDDLSAPGR.[E]	Q32MZ4	LRRFIP1	0.756279	0.597962	0.682867	0.928992	0.97685	0.703714	1.9275	1.33238	0.909503	1.18395
[E].sSENVDcPENPkIk.[L]	Q32MZ4	LRRFIP1	0.705511	0.477699	0.512885	0.782645	0.840038	0.939345	1.82569	1.37246	1.19077	1.35296
[K].lDGkLDqEGDDVqTA.[A]	Q32MZ4	LRRFIP1	0.869096	0.552611	0.668937	0.833288	0.872674	0.820988	1.63692	1.32686	1.15661	1.26201
[M].pEPSkSAPAPkk.[G]	P33778	HIST1H2BB	0.424974	0.267318	0.395174	0.427141	0.69547	0.470974	3.32235	1.71791	1.05584	1.22284
[M].pEPSkSAPAPk.[K]	P33778	HIST1H2BB	0.448992	0.330426	0.451744	0.567733	0.816721	0.541674	2.88286	1.69588	1.02172	1.24224
[M].pEPSkSAPAPkkGSk.[K]	P33778	HIST1H2BB	0.336541	0.279169	0.348899	0.418358	0.511981	0.474358	3.32813	1.84456	1.2153	1.2427
[F].aSNPEFSSIPAqISPEGR.[A]	Q9Y490	TLN1	0.716707	0.600078	0.607132	0.904638	0.996752	0.817839	1.68667	1.32714	1.033	1.31005
[S].sIPAqISPEGR.[A]	Q9Y490	TLN1	0.836029	0.554802	0.66152	0.866195	0.939557	0.855084	1.61778	1.37428	1.04779	1.24696
[A].aAHPDSEEQqqR.[L]	Q9Y490	TLN1	0.837685	0.656991	0.820346	1.00206	1.26545	0.740315	1.47622	1.14344	0.942197	1.1153
[Y].sIPFPTPTTPLTGR.[D]	Q14157-5	UBAP2L	0.730319	0.596258	0.663076	0.912354	0.980296	0.952441	1.54465	1.33882	1.04728	1.2345
[E].dWNEDLSETk.[I]	Q14157-5	UBAP2L	0.791331	0.680729	0.620746	1.08758	1.08207	0.872207	1.35489	1.14174	1.08222	1.28649
[T].aAPPPPSSPLPSk.[S]	Q14157-5	UBAP2L	0.895207	0.59661	0.842584	1.05183	1.0368	0.701554	1.59561	1.19252	0.954576	1.13271
[E].sNEEGkEnR.[D]	Q14157-5	UBAP2L	0.959192	0.632667	0.679616	0.910555	1.01854	1.09435	1.31341	1.17769	1.07164	1.14234
[RH].gVVDSEDIPLNLSR.[E]	Q12931	TRAP1	0.443437	0.381851	0.381521	0.575281	0.831764	0.692567	2.18404	1.77195	1.22971	1.50788
[Q].lLqPTLEINPR.[H]	Q12931	TRAP1	1.06465	0.72174	0.733369	1.17777	1.14068	0.773434	1.21273	1.15558	0.960046	1.06
[R].gVVDSEDIPLnLS.[R]	Q12931	TRAP1	0.76042	0.606394	0.605028	0.895824	1.00127	0.928647	1.45249	1.35002	1.12302	1.27688
[R].gVVDSEDIPLN.[IL]	Q12931	TRAP1	0.809194	0.643887	0.694134	1.09929	1.03358	0.733054	1.43773	1.25258	0.971548	1.325
[Q].aVEGPSENVR.[K]	P31930	UQCRC1	0.753918	0.551475	0.708115	0.846221	1.09522	0.852277	1.45834	1.34392	1.06407	1.32645
[Y].aEDAVPTLTPcR.[F]	P31930	UQCRC1	0.838878	0.58272	0.59302	0.93606	0.958556	0.851921	1.33531	1.39222	1.01849	1.49282
[C].sLEDSqIEkER.[D]	P31930	UQCRC1	0.693096	0.457281	0.545262	0.760368	0.964348	0.806257	1.73554	1.42485	1.14685	1.46615
[Y].gPIEqLPDYNR.[I]	P31930	UQCRC1	0.791529	0.565999	0.641787	0.857949	0.982215	0.794829	1.61344	1.38643	1.03218	1.33364
[S].aAPPPqRDEEEPDGVPEkGkSSGPSAR.[K]	Q96IZ0	PAWR	0.610292	0.522016	0.490161	0.700961	0.753474	0.87295	1.50271	1.61188	1.27741	1.65814
[L].dEYEDDEAGqkER.[K]	Q96IZ0	PAWR	1.07668	0.741412	0.723967	1.30765	1.26741	0.622946	1.36771	1.07195	0.78232	1.03795
[F].iDELDAIGTk.[R]	P17980	PSMC3	1.4085	0.778701	0.807603	1.37396	1.05065	0.716552	1.10865	0.998118	0.838492	0.918777
[L].eTLPTEYDSR.[V]	P17980	PSMC3	0.67259	0.589354	0.622815	0.861077	1.01148	0.739345	1.72598	1.39236	1.07251	1.3125
[N].vSPDVNYEELAR.[C]	P17980	PSMC3	0.541744	0.453391	0.459485	0.723631	0.790654	0.722652	2.19366	1.5981	1.00548	1.51121
[M].nVSPDVNYEELAR.[C]	P17980	PSMC3	0.477277	0.619175	0.679524	1.05636	1.06161	0.686691	1.66026	1.37589	1.02385	1.35935
[D].eLDAIGTk.[R]	P17980	PSMC3	1.22871	0.738993	0.778611	1.25513	0.984051	0.796745	1.08108	1.08331	0.912247	1.14113
[M].fIGDGAkLVR.[D]	P17980	PSMC3	0.775106	0.769405	0.724767	1.14392	1.1388	0.730114	1.51323	1.1698	0.906189	1.12866
[S].qEPSPkPGTEVIPAAPR.[K]	Q96CP2	FLYWCH2	0.918679	0.810555	0.789703	1.12911	1.40788	0.623534	1.36661	1.09596	0.822863	1.03511
[K].kEAPAPPkAE.[A]	P62750	RPL23A	0.567835	0.481088	0.528376	0.660175	0.847237	0.548337	2.63132	1.60967	1.01418	1.11179
[K].kEAPAPPkAEAkA.[K]	P62750	RPL23A	0.482872	1.01479	0.795394	0.930422	1.65885	0.371292	2.23286	1.07124	0.638821	0.803456
[K].eAPAPPkAEAkA.[K]	P62750	RPL23A	0.549311	0.574507	0.648262	0.739884	1.14906	0.503319	2.5551	1.38126	0.871948	1.02736
[K].kEAPAPPkAEA.[K]	P62750	RPL23A	0.595639	0.61295	0.541312	0.798789	0.958381	0.535473	2.5492	1.38923	0.895544	1.12349
[K].eAPAPPkAEA.[K]	P62750	RPL23A	0.506641	0.463496	0.421692	0.610014	0.718163	0.417549	3.36337	1.56867	0.841639	1.08877
[Q].sAPLPmEGVDISPkQDEGVLkVIkR.[E]	Q02790	FKBP4	0.814323	0.930643	0.764749	1.04515	1.28556	0.630292	1.44393	1.11659	0.932287	1.03648
[A].sIEIDSLYEGIDFYTSITR.[A]	P11142-1	HSPA8	0.712487	0.71624	0.577012	0.772266	0.932869	0.675382	1.36257	1.48774	1.33978	1.42366
[L].tIEDGIFEVk.[S]	P11142-1	HSPA8	1.00091	0.586065	0.759927	0.95578	1.21555	0.723883	1.47056	1.18323	0.915088	1.189
[K].sTAGDTHLGGEDFDNR.[M]	P11142-1	HSPA8	0.698458	0.603921	0.700895	1.02986	1.09247	0.754492	1.5507	1.35214	1.00171	1.21536
[T].lDPVEkALR.[D]	P11142-1	HSPA8	0.858165	0.57871	0.689977	0.867262	0.980037	0.753999	1.62144	1.27498	1.12186	1.25358
[A].sSGPTIEEVD.[-]	P11142-1	HSPA8	0.728287	0.578425	0.667068	0.922704	1.0034	0.738226	1.64245	1.34228	0.983751	1.39341
[K].sADFVVEAIGDDVGTLGFSVEGPSQAk.[I]	P21333	FLNA	0.807554	0.893491	0.711883	0.969114	0.950108	0.892469	1.30908	1.25089	1.01914	1.19626
[S].aAGAAPGGGVDTR.[D]	P21333	FLNA	1.02091	1.19427	0.839196	1.31365	1.17735	0.581174	1.13566	0.993435	0.759245	0.985119
[A].gAAPGGGVDTR.[D]	P21333	FLNA	0.974504	0.972011	0.855173	1.13447	1.17295	0.68595	1.2884	1.08833	0.799685	1.02852
[L].sVGSLDDEPGGEAETk.[M]	P43897-2	TSFM	0.864428	0.728795	0.769152	0.984084	1.217	0.654103	1.53243	1.26552	0.878972	1.10552
[N].sSELSGLPAGPDR.[E]	P43897-2	TSFM	0.835726	0.644048	0.651457	0.95031	1.10308	0.642313	1.6747	1.29489	0.951363	1.25211
[S].eLSGLPAGPDR.[E]	P43897-2	TSFM	0.997998	0.635287	0.692317	1.0537	1.08512	0.664661	1.576	1.25317	0.906169	1.13557
[Q].gVSVVDFVR.[F]	P43897-2	TSFM	1.15417	0.795788	0.863409	1.21598	1.19477	0.569981	1.28765	1.13314	0.772507	1.01261
[M].nVAEVDkVTGR.[F]	P63220	RPS21	0.595758	0.506114	0.600016	0.763092	0.90659	0.861597	1.84021	1.5792	1.09456	1.25286
[N].vAEVDkVTGR.[F]	P63220	RPS21	0.89942	0.704427	0.746967	0.962134	1.19286	0.899368	1.39729	1.13746	0.971812	1.08826
[M].gESDDSILR.[L]	P63220	RPS21	0.453214	0.455164	0.457684	0.560267	0.725225	1.01186	1.92189	1.56508	1.29208	1.55754
[A].eVDkVTGR.[F]	P63220	RPS21	0.540263	0.435656	0.501516	0.608478	0.84977	0.743716	2.29063	1.56162	1.10194	1.36641
[G].eSDDSILR.[L]	P63220	RPS21	0.617935	0.440847	0.557408	0.666524	0.738017	0.785699	2.0849	1.62172	1.08207	1.40488
[K].aDGIVSk.[N]	P63220	RPS21	0.603684	0.455338	0.469992	0.646677	0.713564	0.663324	2.474	1.49349	1.08765	1.39229
[V].aEVDkVTGR.[F]	P63220	RPS21	0.554298	0.516666	0.519471	0.74275	0.787812	0.741489	2.02339	1.55557	1.12238	1.43618
[R].gDLPFVVPR.[R]	P35579-1	MYH9	0.574126	0.519235	0.583005	0.753562	0.854131	0.846827	1.64371	1.57397	1.17687	1.47457
[K].lQLqEQLQAETELcAEAEELR.[A]	P35579-1	MYH9	0.718088	0.661448	0.539274	0.904419	0.906255	0.937664	1.11584	1.44531	1.25923	1.51246
[K].eEELVkVR.[E]	P35579-1	MYH9	1.27237	0.573114	0.954778	1.06659	0.68952	1.15098	1.07667	1.0165	1.04477	1.15471
[V].lLqVDDER.[R]	P35579-1	MYH9	1.01581	0.791324	0.900922	1.04902	1.12426	0.768654	1.3368	1.10146	0.923307	0.988448
[G].dLPFVVPR.[R]	P35579-1	MYH9	0.499879	0.384646	0.515797	0.627846	0.743991	0.657651	2.24355	1.64907	1.18059	1.49699
[L].mDFGNDFVPPAPR.[G]	Q9NQC3	RTN4	0.645378	0.533547	0.594134	0.786347	0.892867	0.7492	1.77858	1.53093	1.08639	1.40263
[R].gPLPAAPPVAPER.[Q]	Q9NQC3	RTN4	0.573927	0.474516	0.546213	0.693957	0.83356	0.595333	2.4242	1.56628	1.00886	1.28315
[M].dNADSSPVVDkR.[E]	Q86UP2-1	KTN1	0.727982	0.697271	0.725346	0.942742	1.15716	0.633173	1.75484	1.27633	0.935731	1.14943
[S].fTSSEqELER.[L]	Q86UP2-1	KTN1	0.650212	0.6157	0.63688	0.816572	1.04231	0.674543	1.86549	1.4662	1.00622	1.22587
[S].vYVkDDkIR.[L]	Q86UP2-1	KTN1	1.20714	0.707594	0.867756	1.15421	1.14023	0.641521	1.56554	1.04698	0.766721	0.902306
[K].lVSIGAEEIVDGNVk.[M]	P12814-4	ACTN1	0.632589	0.575909	0.559278	0.842035	0.798834	0.774569	1.76769	1.52704	1.20105	1.321
[L].qEkEDLqELNDR.[L]	P02545	LMNA	0.548948	0.383539	0.43322	0.620967	0.641336	0.780674	2.30176	1.58866	1.22456	1.47633
[Q].ekEDLqELNDR.[L]	P02545	LMNA	0.887129	0.476479	0.637545	0.84041	0.727072	0.741924	1.8297	1.41547	1.09772	1.34656
[A].yEAELGDAR.[K]	P02545	LMNA	0.71567	0.527611	0.587932	0.74518	0.751734	0.732203	2.22243	1.44697	0.990302	1.27997
[L].eTENAGLR.[L]	P02545	LMNA	0.629659	0.67176	0.658381	0.751681	0.868547	0.911455	1.80844	1.42286	1.0615	1.21571
[L].aEDGYSGVEVR.[V]	P23396-2	RPS3	0.82996	0.580307	0.628123	0.967628	0.957258	0.806066	1.52798	1.37283	0.990074	1.33978
[Q].kGGkPEPPAMPqPVPTA.[-]	P23396-2	RPS3	1.11371	0.607109	0.677203	1.07728	0.871155	0.731878	1.61254	1.28647	0.930791	1.09186
[K].gGkPEPPAMPqPVPTA.[-]	P23396-2	RPS3	1.016	0.785958	0.73534	1.06971	1.15969	0.769844	1.32233	1.15564	0.933144	1.05234
[R].eLAEDGYSGV.[E]	P23396-2	RPS3	0.971834	0.772077	0.767197	1.15068	1.16085	0.70285	1.41461	1.14152	0.873867	1.04452
[A].eLNEFLTR.[E]	P23396-2	RPS3	0.925268	0.703359	0.748437	1.04387	1.07057	0.705115	1.38768	1.22604	1.01287	1.17679
[Q].nVLGEkGR.[R]	P23396-2	RPS3	0.649483	0.47557	0.594463	0.807845	0.879648	0.879576	1.39912	1.42464	1.29609	1.59358
[T].sEGLEDAVHSR.[G]	Q27J81	INF2	0.632638	0.5252	0.662124	0.870202	0.967797	0.59599	2.15859	1.29764	1.02087	1.26894
[S].aEPPPPPPPPPLPSVGAk.[A]	Q27J81	INF2	1.08652	0.656674	0.81365	1.22258	1.02777	0.651336	1.41312	1.13214	0.900655	1.09556
[K].aLPTAPPPPPLPGLGAm.[A]	Q27J81	INF2	0.810203	0.676157	0.780668	0.951456	1.10207	1.08302	1.21614	1.14641	1.05317	1.18071
[A].gINLEIIR.[S]	Q27J81	INF2	1.03411	0.694854	0.832054	1.05405	1.14858	0.653043	1.48874	1.14894	0.909625	1.03601
[R].kGAAPTPPGkTGPSAA.[Q]	Q13428-4	TCOF1	0.555881	0.412413	0.46811	0.643042	0.720572	0.50259	2.82255	1.65408	1.00641	1.21435
[R].gPASVPSVGkAV.[A]	Q13428-4	TCOF1	0.549897	0.422929	0.464262	0.669895	0.806561	0.866334	1.72158	1.61848	1.27762	1.60244
[A].gASSSkESSR.[I]	Q13428-4	TCOF1	0.300107	0.43757	0.442409	0.621553	0.879483	0.752454	1.93335	1.63038	1.21188	1.79081
[L].tELLEqER.[K]	Q13428-4	TCOF1	0.610305	0.535791	0.554063	0.761927	0.910478	0.895243	1.80506	1.40256	1.15198	1.37259
[R].kGAAPAPPR.[K]	Q13428-4	TCOF1	0.978808	0.824303	0.754373	1.26535	1.19045	0.641062	1.41599	1.05983	0.859606	1.01022
[A].sAPAkESPR.[K]	Q13428-4	TCOF1	0.569218	0.579126	0.502968	0.6433	0.799947	1.30061	1.32485	1.47829	1.36934	1.43235
[A].aSAPAkESPR.[K]	Q13428-4	TCOF1	0.425643	0.43489	0.522762	0.608257	0.875285	0.858835	2.01285	1.61726	1.20458	1.43964
[T].gDAIEPAPPSqGAEAk.[G]	P49006	MARCKSL1	0.802672	1.18911	1.02638	1.2861	1.78529	0.511175	1.09098	0.833732	0.682154	0.79242
[A].aTPESQEPqAk.[G]	P49006	MARCKSL1	1.33698	1.18635	1.09859	1.38866	1.70632	0.582093	0.858985	0.654344	0.553938	0.633732
[K].gAVVGIDLGTTNScVAVMEGk.[Q]	P38646	HSPA9	0.587025	0.652041	0.46985	0.59758	0.792577	0.86087	1.33647	1.64828	1.48342	1.57189
[S].sGTGEQkEDqkEEkq.[-]	P38646	HSPA9	0.877364	0.474312	0.463406	0.785405	0.761867	1.07041	1.59542	1.41524	1.26284	1.29374
[N].nLLkPISVEGSSk.[K]	Q9HB71	CACYBP	0.545117	0.571167	0.539876	0.842976	1.09183	0.963719	1.42643	1.37692	1.15753	1.48444
[K].kIYEDGDDDMkR.[T]	Q9HB71	CACYBP	0.542239	0.464867	0.510013	0.676701	0.845801	0.76915	1.78754	1.6475	1.22365	1.53254
[L].kkIYEDGDDDMkR.[T]	Q9HB71	CACYBP	0.926517	0.773182	0.835586	1.04903	1.22973	0.790434	1.26645	1.12538	0.928326	1.07537
[L].vDADPVVDSSqkR.[Y]	O00154	ACOT7	0.675933	0.506304	0.609862	0.878609	1.07235	0.744395	1.97118	1.42241	1.00985	1.10911
[S].rqEqEEEGR.[K]	O00154	ACOT7	0.702317	0.661557	0.676067	0.999839	1.14243	0.89514	1.37472	1.23717	1.0175	1.29326
[R].qEqEEEGR.[K]	O00154	ACOT7	0.638468	0.517588	0.518005	0.819655	0.886276	0.913363	1.61102	1.4383	1.21699	1.44033
[K].vIGNqSLVNELAFTAR.[K]	Q13011	ECH1	0.788959	0.636916	0.674027	1.0192	1.13074	0.700602	1.48364	1.26248	1.18006	1.12337
[L].gEAPDHSYESLR.[V]	Q13011	ECH1	0.729952	0.714424	0.70876	0.998086	1.12849	0.714572	1.65185	1.2952	0.923501	1.13516
[N].eLPqPPVPEPANAGkR.[K]	P78347	GTF2I	0.82534	0.706368	0.745835	1.09862	1.12798	0.678279	1.47167	1.22026	0.939776	1.18587
[Q].vTIPDDDnER.[L]	P78347	GTF2I	0.98807	0.823078	0.785571	1.17394	1.11966	0.620773	1.42732	1.12138	0.865621	1.07458
[K].tEPTEDSGISL.[E]	P78347	GTF2I	1.11714	0.847848	0.875179	1.06715	1.16187	0.774765	1.28338	1.09896	0.835693	0.938022
[D].aVEIETLR.[K]	P78347	GTF2I	1.02588	0.743474	0.818921	1.02825	1.06816	0.761611	1.53493	1.12166	0.862132	1.03498
[S].aAGEGkPALSEEER.[Q]	Q04323-2	UBXN1	0.624336	0.644314	0.617474	0.793905	0.980066	0.804264	1.73272	1.41638	1.10762	1.27892
[Y].gGSVGSqPPPVAPEPGPVPSSPSQEPPTkR.[E]	Q04323-2	UBXN1	0.772817	0.656029	0.680454	0.99339	0.944909	0.762799	1.68146	1.25469	1.05789	1.19556
[A].gEGkPALSEEER.[Q]	Q04323-2	UBXN1	0.579492	0.667816	0.562368	0.789906	1.00225	0.938303	1.67301	1.49226	1.14266	1.15195
[F].iDEIDAIGTk.[R]	P62191	PSMC1	1.4085	0.778701	0.807603	1.37396	1.05065	0.716552	1.10865	0.998118	0.838492	0.918777
[K].dDLSGADIk.[A]	P62191	PSMC1	0.68069	0.663003	0.602241	0.851066	0.971125	0.722544	1.72432	1.45471	1.0457	1.28459
[M].akDDLSGADIk.[A]	P62191	PSMC1	0.687588	0.68986	0.715293	0.909503	1.22824	0.524524	1.73874	1.34794	0.984962	1.17335
[DE].tLDPALIRPGR.[LI]	P62191	PSMC1	0.877282	0.609973	0.718083	1.07946	1.1061	0.750206	1.40362	1.23817	0.991988	1.22511
[D].eIDAIGTk.[R]	P62191	PSMC1	1.22871	0.738993	0.778611	1.25513	0.984051	0.796745	1.08108	1.08331	0.912247	1.14113
[R].sGSGSVGnGSSR.[Y]	Q9NYF8-1	BCLAF1	0.345932	0.496342	0.586359	0.579603	1.09937	0.514073	2.42794	1.71705	0.966127	1.26721
[K].mAPVPLDDSNRPASLTkDR.[L]	Q9NYF8-1	BCLAF1	0.714119	0.641886	0.702486	0.939796	0.990605	0.741357	1.58546	1.34612	1.02793	1.31024
[Y].qkATEEHSTR.[Q]	Q9NYF8-1	BCLAF1	0.746917	0.7526	0.749082	0.886028	1.1156	0.685771	1.62361	1.34855	0.938135	1.15371
[Q].eIQELDkDDESLR.[K]	P52565-1	ARHGDIA	0.913173	0.664724	0.647456	0.858243	0.873006	0.97214	1.43114	1.2831	1.09381	1.2632
[A].aENEEDEHSVnYkPPAQk.[S]	P52565-1	ARHGDIA	1.18128	0.753392	0.709343	1.05387	0.873719	0.935962	1.27273	1.12327	1.03217	1.06428
[Q].eLDkDDESLR.[K]	P52565-1	ARHGDIA	1.03166	0.667194	0.646707	1.00247	0.945275	0.956371	1.3869	1.22056	1.03661	1.10626
[A].aVVITEPEHTkER.[V]	Q9P258	RCC2	0.813311	0.753066	0.72826	1.07874	1.02165	0.726312	1.56002	1.20501	0.947198	1.16643
[A].vVITEPEHTkER.[V]	Q9P258	RCC2	0.700161	0.679739	0.690814	0.896608	0.98967	0.690243	1.71339	1.3697	1.03157	1.23811
[R].sHkDEVVkIQ.[S]	P46940	IQGAP1	0.871859	0.675083	0.694584	0.941842	0.965211	0.781303	1.55226	1.2966	1.06813	1.15313
[S].gNLNDPNkEALAk.[T]	P46940	IQGAP1	0.747065	0.608702	0.502192	0.743609	0.929015	1.03777	1.34718	1.46706	1.21682	1.4006
[L].eNLPGVDPNNEAIR.[N]	A2A3N6	PIPSL	0.73253	0.676721	0.644671	1.00433	0.957995	0.71809	1.70574	1.28146	1.06625	1.21222
[A].tTGTEDSDDALLk.[M]	A2A3N6	PIPSL	0.960224	0.787306	0.746641	1.15132	1.18417	0.777502	1.27828	1.1338	0.921734	1.05902
[A].aTGGVFDISNLDR.[L]	P12532-2	CKMT1A	0.528498	0.440996	0.513973	0.616542	0.788408	1.21169	1.52281	1.52631	1.33858	1.5122
[T].sVAPPPEEVEPGSGVR.[I]	Q9BRT3	MIEN1	0.89734	0.715367	0.829308	1.04561	1.13496	0.71304	1.47862	1.1684	0.901664	1.11569
[S].vAPPPEEVEPGSGVR.[I]	Q9BRT3	MIEN1	0.637045	0.540613	0.688128	0.757833	0.971911	0.799923	1.75952	1.39677	1.10345	1.34481
[H].eSETTTSLVLER.[S]	Q04837	SSBP1	0.772285	0.67796	0.795974	0.934666	1.07333	0.802675	1.55496	1.25559	0.979186	1.15338
[E].sETTTSLVLER.[S]	Q04837	SSBP1	0.5873	0.448004	0.460812	0.703177	0.812728	0.65129	2.10747	1.68213	1.22619	1.3209
[E].tTTSLVLER.[S]	Q04837	SSBP1	0.725942	0.55617	0.573978	0.926927	1.05358	0.722862	1.67329	1.37082	1.09983	1.29659
[F].eASPESPPPASPDGVTEIR.[G]	Q96TA1	FAM129B	0.797919	0.642274	0.662576	0.889909	0.973009	0.813567	1.56407	1.35262	1.01912	1.28493
[T].gDAGVPESGEIR.[T]	O00273-1	DFFA	0.769541	0.639756	0.601944	1.01357	1.03175	0.74082	1.52256	1.31843	1.04953	1.3121
[A].fGEEVDAVDTGISR.[E]	O00273-1	DFFA	0.811575	0.770692	0.719963	0.897755	1.10611	0.942313	1.36569	1.25786	1.04786	1.08017
[M].pEPTkSAPAPkk.[G]	P58876	HIST1H2BD	0.394553	0.379981	0.640515	0.477005	1.15763	0.309631	2.96054	1.57647	0.984652	1.11902
[L].aDGGRPDNTGR.[G]	P49588-2	AARS	0.741183	0.638937	0.805644	1.09801	1.01183	0.621869	1.47606	1.41269	0.948174	1.24559
[K].vDDSSEDkTEFTVk.[N]	P49588-2	AARS	1.52911	0.940532	1.11028	1.78432	1.51657	0.47691	0.933029	0.606372	0.497878	0.605003
[L].eMESGASAk.[A]	P49588-2	AARS	0.707629	0.659836	0.714565	1.02322	1.07797	0.731394	1.45804	1.29039	1.05843	1.27853
[V].kVDDSSEDkTEFTVk.[N]	P49588-2	AARS	1.03742	0.668139	0.871065	1.26457	1.17809	0.519958	1.63476	1.06682	0.825189	0.933978
[F].vIVTEEAIAk.[G]	P49588-2	AARS	0.793885	0.873514	0.978431	1.27343	1.41775	0.550404	1.22052	1.07681	0.814626	1.00063
[D].sFAPkTDSEkPFR.[G]	Q9Y2W1	THRAP3	0.660677	0.716384	0.7342	0.792427	1.08976	0.778029	1.67249	1.36457	1.04443	1.14703
[L].vYAPPGkEkqR.[K]	Q9Y2W1	THRAP3	0.690787	0.624683	0.772216	0.860069	1.03208	0.68036	1.79704	1.36615	0.989327	1.18728
[S].aVSELSPR.[E]	Q9Y2W1	THRAP3	0.530251	0.501638	0.538834	0.672707	0.828797	0.744452	2.11171	1.54549	1.14743	1.37869
[H].yEEqPVEEVmPVLEEkER.[S]	Q7KZF4	SND1	0.792904	0.641385	0.657615	0.999902	1.00664	0.7767	1.47114	1.41453	0.945986	1.29321
[S].akPAPPkPEPkPR.[K]	Q15651-1	HMGN3	0.912534	0.586453	0.656542	1.00393	1.19118	0.728312	1.46071	1.21482	1.00422	1.2413
[A].kPAPPkPEPkPR.[K]	Q15651-1	HMGN3	0.570875	0.52036	0.474416	0.768239	0.818749	0.730985	2.01356	1.55877	1.12287	1.42117
[T].vGPkAPSGGkk.[A]	P16104	H2AFX	0.849479	1.01203	1.10289	1.04903	1.73035	0.338499	1.69257	0.961037	0.591408	0.672717
[A].tVGPkAPSGGkk.[A]	P16104	H2AFX	0.586233	0.707719	0.867857	0.782675	1.32873	0.5792	1.83173	1.21134	1.00092	1.1036
[R].aGLqFPVGR.[VI]	P04908	HIST1H2AB	0.548692	0.440043	0.49681	0.6655	0.771303	0.607305	2.64742	1.54398	0.960982	1.31797
[T].sATVGPkAPSGGkk.[A]	P16104	H2AFX	0.836326	0.673222	0.741697	1.00603	1.22558	0.624533	1.68457	1.26116	0.907218	1.03967
[A].gLQFPVGR.[VI]	P04908	HIST1H2AB	0.811084	0.514899	0.684952	0.833693	0.832451	0.815031	1.76555	1.20951	1.15649	1.37634
[K].eAAEqDVEkk.[K]	P26373-1	RPL13	0.399279	0.383455	0.391388	0.536333	0.677488	0.678973	2.63452	1.79413	1.17159	1.33283
[Q].lTGPVMPVR.[N]	P26373-1	RPL13	0.903334	0.752197	0.94725	1.07409	1.01883	0.688693	1.28258	1.1711	0.900873	1.26105
[L].tGPVMPVR.[N]	P26373-1	RPL13	0.754355	0.711852	0.808158	1.01705	1.17381	0.692668	1.51758	1.1968	0.934113	1.19362
[A].aEQDVEkkk.[-]	P26373-1	RPL13	1.2301	0.736398	0.928454	1.13084	1.00291	0.666705	1.38478	1.04228	0.832729	1.0448
[A].sGPIRPIVR.[C]	P26373-1	RPL13	0.666582	0.458528	0.670416	0.777917	0.986469	0.691771	1.70048	1.43879	1.18935	1.41971
[L].dVGNAEVkLEEENR.[S]	P51572-2	BCAP31	0.752431	0.894348	0.804701	0.938702	1.26665	0.66683	1.51348	1.17549	0.90434	1.08302
[N].vDDSkEYFSk.[H]	P32119	PRDX2	1.57934	0.99079	1.05006	1.31716	1.39191	0.989087	0.471511	0.627626	0.804823	0.777699
[L].fIIDGkGVLR.[Q]	P32119	PRDX2	0.962172	0.658353	0.655665	1.05914	1.13228	0.693279	1.42705	1.15216	1.0833	1.1766
[R].iGkPAPDFkAT.[A]	P32119	PRDX2	1.33368	0.477609	0.561765	0.838306	0.750331	1.1332	1.52194	1.17638	1.06525	1.14155
[K].nITLDDASAPR.[L]	O75534-4	CSDE1	0.810115	0.635429	0.645242	0.974745	1.00749	0.753499	1.5627	1.29931	1.05222	1.25926
[L].kNITLDDASAPR.[L]	O75534-4	CSDE1	0.915846	0.718621	0.834972	1.08913	1.14251	0.648379	1.48033	1.2053	0.913983	1.05092
[C].eGPkAVAAPRPDR.[L]	O75534-4	CSDE1	0.932759	0.82382	0.910289	1.18569	1.34785	0.731421	1.21979	1.00562	0.869418	0.973345
[A].aDSISESVPVGPkVR.[D]	P45974-1	USP5	0.687774	0.744921	0.753378	1.07083	1.16166	0.701131	1.31996	1.34277	0.935644	1.28194
[S].gEYSkPVPESGDGER.[V]	P45974-1	USP5	0.871645	0.83495	0.711849	1.09056	1.16799	0.750192	1.28133	1.21099	0.917923	1.16256
[R].lVSPGSANETSSILVESVTR.[S]	O75369-8	FLNB	0.681112	0.502268	0.510967	0.932904	0.937775	0.754051	1.56597	1.49352	1.14189	1.47954
[M].sLqESGLkVNqPASFAIR.[L]	O75369-8	FLNB	1.23762	0.575547	0.688411	1.03226	0.950234	0.930573	1.36468	1.21219	0.901868	1.10661
[K].dcGATWVVLGHSER.[R]	P60174	TPI1	0.547681	0.665718	0.747992	0.826448	1.43131	0.751021	1.53832	1.33267	0.940264	1.21857
[E].fVDIINAkq.[-]	P60174	TPI1	0.418144	0.28353	0.353022	0.471597	0.602268	0.497747	2.77416	1.97695	1.09781	1.52478
[R].iIYGGSVTGATck.[E]	P60174	TPI1	0.781314	0.64161	0.709497	0.825252	0.934461	0.858911	1.46273	1.33574	1.09165	1.35883
[Q].eVHEkLR.[G]	P60174	TPI1	0.578965	0.558004	0.582894	0.750984	0.848042	0.727913	2.09037	1.53279	1.06607	1.26398
[K].eLASqPDVDGF.[L]	P60174	TPI1	0.691727	0.724812	0.74059	0.845233	1.00035	0.794308	1.61052	1.36126	1.0151	1.2161
[Y].eEIDNAPEER.[A]	P49411	TUFM	0.92191	0.829106	0.735226	1.12849	1.21839	0.674343	1.41885	1.13948	0.833911	1.1003
[D].aVDTYIPVPAR.[D]	P49411	TUFM	1.02464	0.895946	0.757064	1.17819	1.20393	0.7014	1.22368	1.07075	0.869351	1.07504
[L].dAVDTYIPVPAR.[D]	P49411	TUFM	0.729997	0.610297	0.558402	0.885735	0.907813	0.664435	1.63847	1.5196	1.06389	1.42136
[L].aAPAAEEkEEAR.[E]	Q01650	SLC7A5	0.756627	0.543362	0.545609	0.936311	0.934092	0.821332	1.6759	1.42785	1.01145	1.34746
[A].lAAPAAEEkEEAR.[E]	Q01650	SLC7A5	0.497458	0.428014	0.606635	0.742899	1.08067	0.479731	2.26271	1.61825	0.947895	1.33573
[AV].aEEkEEAR.[E]	Q01650	SLC7A5	1.01361	0.483892	0.748786	0.971997	0.895006	0.775303	1.60602	1.31907	0.931085	1.25523
[V].sVDETIkNPR.[S]	Q99832	CCT7	1.16868	0.642801	0.78626	1.04475	1.11023	0.736412	1.38244	1.13847	0.889311	1.10064
[Y].vEEGLHPqIIIR.[A]	Q99832	CCT7	0.767366	0.598287	0.657431	0.774728	0.953792	0.578407	2.12173	1.39265	1.0193	1.13631
[S].vDETIkNPR.[S]	Q99832	CCT7	0.733381	0.552636	0.676375	0.801365	0.965309	0.897718	1.57033	1.36054	1.12619	1.31615
[R].vPEEDLkR.[T]	Q99832	CCT7	0.489333	0.407556	0.49091	0.678537	0.784654	0.780038	1.8577	1.77789	1.22577	1.50761
[A].eGPDEDSSnR.[E]	P13667	PDIA4	0.656105	0.701256	0.530812	1.05015	1.10559	0.749739	1.40837	1.32322	1.03659	1.43817
[G].aEGPDEDSSNR.[E]	P13667	PDIA4	0.756598	0.744664	0.611896	1.1556	1.09038	0.649796	1.41511	1.28586	0.987356	1.30275
[A].gPPDTPYEGGR.[Y]	P61086	UBE2K	0.725553	0.699565	0.593079	1.03853	1.08857	0.709897	1.42174	1.38543	1.0134	1.32423
[D].lVDENFTELR.[G]	P61086	UBE2K	0.723079	0.717393	0.721713	0.890521	1.22823	0.707294	1.54417	1.288	0.92498	1.25462
[K].sWDVETATELLLSN.[-]	P61086	UBE2K	0.795421	0.669957	0.587087	0.809708	0.893547	0.822415	1.35363	1.38234	1.29147	1.39442
[A].gITLkEANEILqR.[S]	P12268	IMPDH2	0.650218	0.625894	0.607167	0.763622	1.00632	0.994414	1.60645	1.38759	1.07368	1.28465
[C].gIPITDTGR.[M]	P12268	IMPDH2	1.11285	0.712339	0.594293	1.30673	0.940359	0.648613	1.48528	1.12284	0.91363	1.16307
[K].eANEILQR.[S]	P12268	IMPDH2	0.766016	0.578921	0.6515	0.861836	0.986789	0.755054	1.80192	1.35018	1.00187	1.24592
[G].iPITDTGR.[M]	P12268	IMPDH2	0.547934	0.408379	0.429999	0.618736	0.643658	0.72516	2.14752	1.72091	1.15452	1.60319
[F].cGIPITDTGR.[M]	P12268	IMPDH2	0.606847	0.512936	0.513911	0.711794	0.895085	0.832001	1.81427	1.60356	1.17333	1.33626
[Q].eAVEEDIPIAkER.[T]	P52815	MRPL12	0.623247	0.581336	0.546511	0.761438	0.954495	0.685689	1.99405	1.46394	1.09119	1.2981
[E].dIPIAkER.[T]	P52815	MRPL12	0.483975	0.394547	0.464692	0.607572	0.72394	0.671388	2.46198	1.78243	1.05348	1.356
[L].kLTVEDLEkER.[D]	Q15691	MAPRE1	1.14939	0.679578	0.838263	1.0745	1.07793	0.801385	1.3383	1.08918	0.900685	1.05078
[Y].sTSVTSDNLSR.[H]	Q15691	MAPRE1	0.473628	0.651928	0.666226	0.930446	1.07251	0.686254	1.68212	1.40894	1.06913	1.35883
[A].aAPkAGPGVVR.[K]	Q15691	MAPRE1	0.787264	0.529191	0.534658	0.81513	0.854223	0.726309	1.80239	1.45044	1.09408	1.40632
[L].tEEqIAEFk.[E]	P62158		1.32426	0.954992	0.864647	1.45901	1.15516	0.535374	1.0708	0.979309	0.747562	0.908887
[L].fDkDGDGTITTk.[E]	P62158		0.845409	0.966824	0.684923	0.937509	1.54249	0.579839	1.49422	1.23169	0.784726	0.932365
[R].eSHPHGVkR.[S]	O00193	SMAP	0.523058	0.571365	0.498899	0.795918	0.796798	1.109	1.73166	1.51409	1.19475	1.26447
[A].eHPDEVEDPkNkk.[D]	O00193	SMAP	0.491836	0.3412	0.472194	0.575707	0.687742	0.681655	2.4525	1.72195	1.17724	1.39797
[E].sHPHGVkR.[S]	O00193	SMAP	0.772112	0.605374	0.648575	0.902072	0.936508	0.873384	1.42242	1.25971	1.15572	1.42412
[R].sASPDDDLGSSN.[W]	O00193	SMAP	1.02935	0.864482	0.859722	1.05376	1.16371	0.694496	1.36257	1.13266	0.869763	0.969496
[E].dVTPIPSDSTR.[R]	P62263	RPS14	0.575047	0.494706	0.636355	0.772634	0.776723	0.707973	1.99852	1.52249	1.08843	1.42713
[R].iEDVTPIPSDSTR.[R]	P62263	RPS14	0.494222	0.442702	0.405313	0.665343	0.729167	0.612435	2.31787	1.78541	1.10193	1.4456
[L].aAqDVAqR.[C]	P62263	RPS14	0.79053	0.798832	0.818068	1.00543	1.15813	0.564279	1.74845	1.1671	0.843324	1.10586
[V].tPIPSDSTR.[R]	P62263	RPS14	0.713175	0.630161	0.602906	0.89905	0.976213	0.713403	1.8665	1.35163	0.996017	1.25095
[V].sAPNLPTAEDNLEYVR.[T]	P46109	CRKL	0.812724	0.637749	0.676818	0.870986	1.03172	0.798958	1.63072	1.34602	0.988499	1.2058
[S].aPNLPTAEDNLEYVR.[T]	P46109	CRKL	0.7557	0.678105	0.696643	0.974425	1.17123	0.687423	1.51538	1.29275	0.957274	1.27108
[L].aVDEQEAAVk.[S]	Q9NUU7	DDX19A	0.741898	0.781182	0.711481	1.10193	1.26266	0.793988	1.25974	1.18249	0.960739	1.20389
[L].dTDDLDEIEkIAN.[-]	Q9NUU7	DDX19A	1.15994	0.793363	0.762136	1.1222	1.13481	0.855724	1.1454	1.03197	0.951363	1.0431
[T].dEEEkEDR.[A]	Q9NUU7	DDX19A	1.13775	0.702658	0.758706	1.15049	1.08297	0.82345	1.2208	1.11109	0.921989	1.0901
[A].aAEPGPDPSEVDGLLR.[Q]	Q9BPX5	ARPC5L	0.762668	0.729116	0.744797	1.07195	1.17279	0.748827	1.42784	1.25149	0.977751	1.11278
[A].aEPGPDPSEVDGLLR.[Q]	Q9BPX5	ARPC5L	0.808538	0.659112	0.699976	1.01362	1.0353	0.787585	1.41446	1.31632	1.0227	1.2424
[L].vASNLNLkPGEcLR.[V]	P09382	LGALS1	0.748471	0.614832	0.644831	0.832184	0.829491	0.9407	1.55447	1.40575	1.22449	1.20478
[R].gEVAPDAkSF.[V]	P09382	LGALS1	0.526084	0.494848	0.533024	0.629565	0.796115	0.977774	1.81521	1.52893	1.26001	1.43843
[L].nLkPGEcLR.[V]	P09382	LGALS1	0.340793	0.24807	0.326512	0.383798	0.516029	0.948153	2.30286	1.89716	1.45642	1.58021
[R].gEVAPDAk.[S]	P09382	LGALS1	0.771	0.549885	0.568404	0.892082	0.931876	0.919511	1.70852	1.32208	1.08632	1.25032
[R].sGkTELAEPIAIRPT.[S]	P07814	EPRS	0.397564	0.242052	0.282634	0.424665	0.429142	0.791221	2.35505	1.94408	1.40773	1.72586
[L].lAIPVVkGR.[K]	P07814	EPRS	0.810466	0.490608	0.529556	0.728182	0.701053	0.785988	1.72168	1.57446	1.17335	1.48466
[L].aIPVVkGR.[K]	P07814	EPRS	0.789701	0.657111	0.607333	0.875986	0.805863	0.848104	1.71784	1.38623	1.05669	1.25514
[E].eILEkGLkVR.[E]	P62913	RPL11	0.795692	0.567182	0.756897	0.982803	0.861583	0.812896	1.37391	1.28717	1.19178	1.37009
[K].yDGIILPGk.[-]	P62913	RPL11	0.599831	0.537192	0.566701	0.837697	0.754444	0.841039	1.77283	1.50139	1.22517	1.3637
[Q].eHIDLGIk.[Y]	P62913	RPL11	1.56264	0.759118	0.929141	1.36017	0.872091	0.871981	1.04212	0.913322	0.740319	0.949095
[Q].kYDGIILPGk.[-]	P62913	RPL11	1.36677	0.70988	1.2137	1.29283	1.17876	0.875335	0.937337	0.840722	0.756137	0.828516
[S].aqDPqAVLGALGR.[A]	P26640	VARS	0.735846	0.618639	0.609892	1.00067	0.918332	0.808928	1.49068	1.33504	1.09827	1.38369
[Y].dLPTPPGEkkDVSGPMPDSYSPR.[Y]	P26640	VARS	0.586347	0.467569	0.577941	0.683463	0.709601	0.804285	2.00861	1.55959	1.16914	1.43345
[Q].nEGLTIDLk.[N]	Q15233	NONO	0.987056	0.825562	1.10474	1.06022	1.04547	0.715993	1.37505	1.05287	0.90726	0.925772
[Q].nEGLTIDLkNFR.[K]	Q15233	NONO	0.644485	0.742764	0.957371	0.9221	0.960723	0.542581	1.74262	1.30607	1.02264	1.15865
[Q].qEGFkGTFPDAR.[E]	Q15233	NONO	0.837106	0.883423	1.30431	1.27303	1.13409	0.717438	1.25155	0.95071	0.823167	0.825182
[A].aEEEDEADPk.[R]	P20962	PTMS	0.66372	0.582366	0.576185	0.720222	0.789972	0.936493	1.81381	1.41929	1.15009	1.34784
[A].aEEEDEADPkR.[Q]	P20962	PTMS	1.01445	0.872323	0.76956	1.11702	1.21608	0.767954	1.17231	1.02905	0.993137	1.04812
[A].eEEDEADPk.[R]	P20962	PTMS	1.01824	1.04591	0.793496	1.16697	1.03719	0.667643	1.45558	1.06145	0.826991	0.926535
[R].iGLSVSEVIEGYEIAcR.[K]	P50990	CCT8	0.799167	0.722437	0.723891	1.09449	1.00556	0.913527	1.28416	1.19366	1.0707	1.1924
[S].tDNLMDDIER.[A]	P50990	CCT8	0.800543	0.614931	0.667262	0.916905	1.03949	0.665073	1.68265	1.38624	1.00314	1.22377
[F].sGLEEAVYR.[N]	P50990	CCT8	0.694476	0.601693	0.717747	0.985	1.03089	0.798982	1.59316	1.33251	1.026	1.21955
[R].sIQADGLVWGSSk.[L]	P24534	EEF1B2	0.889378	0.672088	0.720135	0.958377	1.03488	0.748396	1.30945	1.33485	1.0577	1.27475
[L].vPVGYGIk.[K]	P24534	EEF1B2	0.498094	0.345505	0.356275	0.527028	0.574223	0.725511	2.79581	1.73862	1.08228	1.35666
[S].vHDEDRDDHTR.[C]	O43237	DYNC1LI2	0.882025	0.753771	0.722802	1.00373	1.14808	0.894624	1.3288	1.2102	0.932201	1.12377
[R].tIEYLEEVAITFAk.[G]	P40939	HADHA	0.901536	0.889532	0.686739	1.00058	1.05315	0.759081	1.12452	1.24226	1.16677	1.17583
[L].vEPLGPGLkPPEER.[T]	P40939	HADHA	0.644864	0.398159	0.381477	0.667702	0.65028	1.1705	1.74871	1.56023	1.24405	1.53402
[L].aDkkISPkR.[D]	P40939	HADHA	0.661604	0.429519	0.501465	0.615174	0.787486	0.98115	1.63675	1.53867	1.33761	1.51056
[M].vNTkPEkTEEDSEEVR.[E]	Q16543	CDC37	0.866361	0.79979	0.696446	0.978666	1.18166	0.753262	1.38137	1.22117	1.02873	1.09254
[Y].eSLPEELqk.[C]	Q16543	CDC37	1.04241	0.708023	0.728423	1.09213	1.10469	0.730129	1.40989	1.17596	0.900226	1.10811
[Q].eEASGGPTAPkAESGR.[S]	P50552	VASP	0.933281	0.612542	0.639105	1.07868	0.934103	0.893985	1.45071	1.19116	1.0339	1.23253
[Q].gGLGPmNIPLVSDPkR.[T]	Q06830	PRDX1	0.873291	0.735419	0.741786	0.83073	1.03741	0.986217	1.39308	1.17755	1.05344	1.17108
[L].fIIDDkGILR.[Q]	Q13162	PRDX4	1.59114	0.635762	0.630239	1.37706	0.858928	0.686205	1.36779	1.07691	0.881555	0.894412
[K].iGHPAPNFkAT.[A]	Q06830	PRDX1	1.074	0.810501	0.801846	1.07576	1.08506	0.797029	1.3849	1.13827	0.873452	0.959181
[Q].qSPAAAPGGTDEkPSGkER.[R]	Q13200	PSMD2	1.03093	0.624803	0.703423	1.0353	1.01305	0.884579	1.4515	1.19665	1.05757	1.0022
[E].sVDPVGqPALkTEER.[K]	O95433	AHSA1	0.917247	0.888466	0.870097	1.19098	1.34988	0.675608	1.12466	1.07777	0.865688	1.0396
[A].sGRPQDDTDSSR.[A]	Q8TF74	WIPF2	0.691612	0.641739	0.626062	0.943298	1.1705	0.746671	1.56146	1.36515	1.0496	1.20391
[S].gRPqDDTDSSR.[A]	Q8TF74	WIPF2	0.694153	0.521681	0.573025	0.871	0.815877	0.789013	1.70288	1.47424	1.10979	1.44834
[L].aDADADLEER.[L]	O43633	CHMP2A	0.822471	0.755614	0.730811	0.960536	1.08666	0.684833	1.67907	1.22521	0.915233	1.13957
[S].aLADADADLEER.[L]	O43633	CHMP2A	0.759036	0.667878	0.61928	0.909999	0.977585	0.664222	1.83938	1.37472	0.912999	1.2749
[R].iLTEAEIDAHLVALAERD.[-]	P60900	PSMA6	0.799228	0.740503	0.628995	0.94455	1.0154	0.82776	1.2846	1.38901	1.12915	1.2408
[R].gDEELDSLIk.[A]	P0C0S5	H2AFZ	0.564427	0.404212	0.553307	0.631208	0.723818	0.586674	2.58757	1.59197	1.02305	1.33378
[Q].mVqEDLEkTR.[A]	P26038	MSN	0.324223	0.304149	0.317184	0.418146	0.527694	1.05535	2.21287	1.80367	1.46148	1.57522
[V].qEDLEkTR.[A]	P26038	MSN	0.339038	0.261185	0.298567	0.404257	0.484048	1.13611	2.09364	1.73119	1.52363	1.72833
[M].vqEDLEkTR.[A]	P26038	MSN	0.354673	0.382751	0.372622	0.569885	0.71623	0.777328	2.10976	1.71637	1.34063	1.65975
[T].vAEqGEDITSkkDR.[G]	Q13451-1	FKBP5	0.446756	0.371623	0.385939	0.488192	0.578169	1.1857	1.82972	1.68707	1.46297	1.56386
[A].eQGEDITSkkDR.[G]	Q13451-1	FKBP5	0.637711	0.405262	0.48253	0.663084	0.701647	1.02971	1.81267	1.46998	1.32292	1.47448
[L].dSANEkGLYR.[R]	Q13451-1	FKBP5	0.518262	0.395573	0.495858	0.636852	0.712351	0.827567	1.85717	1.61585	1.29096	1.64956
[M].gEDEkPAAkENSEGAGAk.[A]	Q9UHV9	PFDN2	0.522133	0.532635	0.556645	0.73826	0.872185	0.966937	1.28466	1.45651	1.35899	1.71105
[M].gEDEkPAAk.[E]	Q9UHV9	PFDN2	1.22827	0.543152	0.662126	1.04106	0.840477	1.11555	1.30694	1.09144	1.03393	1.13703
[D].tLkEVDETR.[K]	Q9UHV9	PFDN2	0.7723	0.51597	0.620211	0.859493	0.898465	0.939647	1.60309	1.37149	1.10218	1.31715
[R].lSAkPAPPkPEPR.[P]	O00479	HMGN4	0.424583	0.303759	0.400893	0.559464	0.65669	0.776861	2.30074	1.83658	1.2672	1.47323
[A].kPAPPkPEPRPk.[K]	O00479	HMGN4	0.466426	0.455013	0.396998	0.644153	0.756662	0.731317	2.11161	1.67664	1.29679	1.46439
[S].akPAPPkPEPRPk.[K]	O00479	HMGN4	0.748416	0.531309	0.605597	0.914991	1.12457	0.735119	1.60491	1.31637	1.08104	1.33767
[Q].vLLSEPEEAAALYR.[G]	P13798	APEH	0.727469	0.676694	0.605411	1.0007	0.998692	0.894116	1.44713	1.22521	1.13363	1.29094
[L].sEPEEAAALYR.[G]	P13798	APEH	1.2887	0.704686	0.819731	1.16213	1.22742	0.537212	1.38449	1.10725	0.801139	0.967239
[S].sSILIDESEPTTNIQIR.[L]	Q9UNZ2-5	NSFL1C	0.622565	0.573055	0.553489	0.735008	0.852873	0.790426	1.78685	1.43318	1.23255	1.42
[R].gTAPSDnR.[V]	Q9UNZ2-5	NSFL1C	1.19166	0.396136	0.943973	0.659868	0.648374	0.852159	1.83443	1.24301	0.976145	1.25424
[L].dLAVLDqVEAR.[L]	Q13561-2	DCTN2	0.769512	0.834649	0.681768	0.840396	1.20471	0.861721	1.42031	1.28634	0.976204	1.12439
[N].lTDPDGALAk.[R]	Q13561-2	DCTN2	0.970729	0.86844	0.836254	1.17458	1.38718	0.751693	1.16636	1.02785	0.835768	0.981142
[L].tDPDGALAk.[R]	Q13561-2	DCTN2	0.629398	0.602624	0.686598	0.822862	1.10737	0.626666	1.86299	1.4278	0.986332	1.24736
[C].lNLqEqYLEAHDR.[L]	P49321-3	NASP	0.811691	0.749367	0.784899	0.967152	1.2164	0.904269	1.36457	1.23335	0.948367	1.01993
[L].tETkDGSGLEEkVR.[A]	P49321-3	NASP	0.720806	0.664974	0.653394	0.972961	1.11849	0.823743	1.4644	1.22868	1.11254	1.24002
[L].kELLPEIR.[E]	P49321-3	NASP	1.85369	0.65207	0.797095	1.18101	0.912631	1.02372	0.989109	0.900111	0.829518	0.861037
[T].dVqEEcR.[E]	P49321-3	NASP	0.925967	0.778072	0.75935	1.03622	1.12754	0.71319	1.49076	1.11431	0.946787	1.10782
[L].tTFNIqDGPDFqDR.[V]	Q99757	TXN2	0.763635	0.754896	0.738287	0.985974	1.22002	0.82851	1.45612	1.28687	0.99833	0.967357
[F].nIqDGPDFqDR.[V]	Q99757	TXN2	0.585393	0.441945	0.492973	0.708612	0.751554	0.787992	1.87384	1.64252	1.22722	1.48795
[Y].nEFPEPIkLDkNDR.[A]	P51149	RAB7A	0.897058	0.714786	0.703228	1.06842	1.20018	0.732745	1.36305	1.23935	1.0455	1.03569
[E].hTPEEEIDHTGAkTk.[S]	O95757	HSPA4L	0.562407	0.571423	0.497065	0.854612	0.902739	0.840534	1.65423	1.31782	1.31199	1.48718
[K].sIDLPIqSS.[L]	O95757	HSPA4L	0.824277	0.655803	0.716304	0.985831	1.09713	0.854662	1.59556	1.18801	0.985423	1.09701
[Y].dVIANqPVVIDnGSGVIk.[A]	P61163	ACTR1A	0.552513	0.553587	0.573108	0.704553	0.827068	0.747463	1.79103	1.59654	1.20219	1.45194
[A].dNAGEEGGEAPqEPQS.[-]	P31947-1	SFN	0.695749	0.518614	0.53243	0.813298	0.854752	1.28284	1.28359	1.27962	1.2578	1.48131
[F].nVPVSLESkkAAR.[A]	P82979	SARNP	0.716714	0.625549	0.613764	0.817249	0.906604	0.955164	1.35019	1.29534	1.24538	1.47404
[F].nVPVSLESk.[K]	P82979	SARNP	1.14773	0.734446	0.787375	1.15434	1.00627	0.835537	1.26862	1.0983	0.887959	1.07942
[T].sEIPqTER.[M]	P82979	SARNP	0.873189	0.762981	0.681578	1.02446	1.10825	0.708615	1.47227	1.21538	0.949167	1.20411
[T].eFEDIkSGYR.[I]	Q01105	SET	0.956053	0.405411	0.385205	0.613208	0.7202	1.05072	2.00148	1.53813	1.0727	1.25689
[K].kkPRPPPALGPEETSA.[S]	Q01105	SET	0.975334	0.646276	0.765621	0.941264	1.04299	0.650339	1.71798	1.21855	0.971959	1.06968
[N].eSGDPSSk.[S]	Q01105	SET	1.34006	0.475571	0.556569	0.825764	0.724074	1.13297	1.62556	1.19732	0.973532	1.14858
[K].kPRPPPALGPEETSA.[S]	Q01105	SET	0.679701	0.496213	0.531271	0.836339	0.944477	0.655892	2.07037	1.43392	1.07899	1.27283
[K].kPRPPPALGPEET.[S]	Q01105	SET	0.624466	0.532822	0.553159	0.803244	0.878844	0.607	2.25063	1.42566	0.978882	1.3453
[S].eAGDAPPDDGPPGELGPDGPDGPEEkGR.[D]	P08621-1	SNRNP70	0.678404	0.610053	0.572721	0.815328	0.983331	0.794981	1.66205	1.4806	1.10401	1.29853
[Q].sTPVPGPSVPPPEELqVSPGPR.[Q]	P51610-1	HCFC1	0.678173	0.609475	0.668724	1.01036	1.08331	0.655515	1.75626	1.32589	0.953194	1.25911
[M].aVTPGTTTLPATVk.[V]	P51610-1	HCFC1	0.798981	0.907277	0.783316	1.03035	1.30848	0.716052	1.23828	1.12905	0.953487	1.13472
[K].gPLPAGTIL.[K]	P51610-1	HCFC1	0.766073	0.741838	0.683746	0.836567	1.18973	0.903801	1.51992	1.09468	1.02619	1.23745
[S].sLELPADTVQR.[I]	Q16719	KYNU	0.664527	0.632132	0.608858	0.938356	1.03839	0.753273	1.65146	1.38747	1.03925	1.28628
[L].tDLQEAEkTIGR.[S]	O14974	PPP1R12A	0.960237	0.798053	0.766177	0.992162	1.20008	0.769132	1.36225	1.17529	0.943858	1.03277
[T].kISPkEEER.[K]	O14974	PPP1R12A	0.676742	0.549654	0.590871	0.785291	0.887981	0.730747	2.02007	1.41465	1.09757	1.24642
[T].gkTPVEPEVAIHR.[I]	P60866-2	RPS20	1.11228	0.654716	0.734344	1.06251	1.04832	0.73088	1.46874	1.13642	0.948681	1.10311
[R].lIDLHSPSEIVkq.[I]	P60866-2	RPS20	0.888913	0.623356	0.623578	1.05886	0.97186	0.861068	1.41492	1.23559	1.04523	1.27663
[S].sVkkDETNVk.[M]	P07910-1	HNRNPC	0.946756	0.673525	1.04581	0.881056	1.02402	0.585396	1.81559	1.14293	0.912936	0.971978
[F].dLDYDFqR.[D]	P07910-1	HNRNPC	0.869231	0.704182	0.743918	1.14568	1.10732	0.593512	1.61348	1.18098	0.87085	1.17086
[S].vkkDETNVk.[M]	P07910-1	HNRNPC	0.8799	0.710093	0.949403	0.941339	1.05749	0.686569	1.71299	1.20963	0.89133	0.961259
[K].kDETNVk.[M]	P07910-1	HNRNPC	0.682136	0.566453	0.707921	0.768102	0.917334	0.62316	2.17455	1.40189	0.971263	1.18719
[R].vPPPPPIAR.[A]	P07910-1	HNRNPC	0.568391	0.555468	0.632262	0.744516	0.956972	0.737533	1.94657	1.43616	1.02841	1.39373
[T].eVLLqPNPSAR.[V]	Q9NR46-2	SH3GLB2	0.84692	0.769853	0.701348	0.965608	1.09827	0.598952	1.63266	1.32813	0.905247	1.15301
[C].lEEVAPPASGTR.[K]	Q9NR46-2	SH3GLB2	0.879915	0.710074	0.632943	0.978389	1.03915	0.81175	1.53326	1.28652	0.97978	1.14822
[DT].tVPDFqETRPR.[N]	Q9NR46-2	SH3GLB2	0.841128	0.73244	0.792111	0.965995	1.12954	0.662419	1.68257	1.1846	0.934947	1.07425
[H].lEVPLEENVNR.[R]	Q96CT7	CCDC124	0.74192	0.650691	0.670162	0.98408	0.94071	0.694696	1.76359	1.3213	0.965084	1.26777
[A].eEAADRHPER.[R]	Q96CT7	CCDC124	0.564509	0.547874	0.54704	0.799522	0.793614	0.628232	2.28124	1.6086	0.967183	1.26218
[L].sVAEEAADR.[H]	Q96CT7	CCDC124	0.773099	0.479937	0.487776	0.739285	0.722022	0.835803	2.02098	1.51637	1.1339	1.29082
[R].kqPPkEPSEVPTPkRP.[R]	P17096-2	HMGA1	0.550115	0.517785	0.569013	0.714534	0.932938	0.471484	2.8476	1.43321	0.887963	1.07536
[K].qPPkEPSEVPTPkRP.[R]	P17096-2	HMGA1	0.394383	0.394551	0.477977	0.522971	0.746737	0.594743	2.61181	1.75587	1.17989	1.32107
[PQ].kEPSEVPTPkRPR.[G]	P17096-2	HMGA1	0.827495	0.825476	0.792837	1.03128	1.0793	0.729595	1.43781	1.15534	0.961637	1.15924
[F].lGPEPEDLEDLYSR.[Y]	P43686	PSMC4	0.878997	0.602607	0.731951	1.08404	1.00754	0.769712	1.39222	1.30029	1.06085	1.17178
[DE].tLDPALLRPGR.[LI]	P62333	PSMC6	0.877282	0.609973	0.718083	1.07946	1.1061	0.750206	1.40362	1.23817	0.991988	1.22511
[K].aEPDESNAR.[Y]	Q5JXB2	UBE2NL	0.842736	0.774007	0.54422	1.06232	1.24128	0.769119	1.2414	1.24268	0.995727	1.28652
[L].lAEPVPGIk.[A]	Q5JXB2	UBE2NL	1.10732	0.907293	0.685164	1.18725	1.42477	0.86381	1.0208	0.969178	0.877039	0.957376
[L].aEPVPGIk.[A]	Q5JXB2	UBE2NL	0.826744	0.619756	0.55424	0.889896	1.01433	0.835176	1.50082	1.3581	1.11762	1.28332
[K].eLTDEEAER.[L]	Q9Y266	NUDC	0.765454	0.531314	0.584707	0.853029	0.906234	0.795039	1.77958	1.3882	1.10857	1.28788
[K].eLTDEEAERL.[Q]	Q9Y266	NUDC	0.887238	0.660747	0.712562	1.21261	1.03325	0.859826	1.41706	1.14382	0.930777	1.14211
[K].kINPENSkLSDLDSETR.[S]	Q9Y266	NUDC	0.635035	0.564518	0.616976	0.72493	0.96186	0.774805	1.64385	1.31222	1.26798	1.49782
[S].aTPSSSLPkR.[T]	P12270	TPR	0.636995	0.64187	0.58852	0.813685	0.982695	0.813682	1.72915	1.4221	1.07947	1.29183
[H].aPPqELGPPVqR.[I]	P12270	TPR	0.78662	0.53707	0.59312	0.879747	0.916362	0.79958	1.75694	1.36839	1.08702	1.27515
[S].aEGAPPPGPAPPPATSHPR.[V]	P46379-3	BAG6	0.922183	0.640384	0.765459	0.946114	1.06281	0.657785	1.65587	1.23202	0.947669	1.16971
[Q].vqPGVDIIR.[T]	P46379-3	BAG6	0.863	0.799503	0.717284	0.955498	1.00448	0.950505	1.29951	1.18759	1.04585	1.17678
[T].gDHIPTPqDLPqR.[K]	O43768-4	ENSA	1.20046	0.86226	0.892842	1.08507	1.29301	0.694375	1.27232	1.00441	0.792246	0.902997
[D].hIPTPqDLPqR.[K]	O43768-4	ENSA	0.852534	0.607515	0.669216	0.942449	0.981111	0.784327	1.75306	1.30204	0.953741	1.154
[M].gLTPESPIVPPPmSPSSk.[S]	Q13409-2	DYNC1I2	0.700982	0.778822	0.873663	1.13395	1.2741	0.536042	1.451	1.23519	0.899658	1.11659
[Y].dVGEQIAVPR.[N]	Q13409-2	DYNC1I2	0.514815	0.515908	0.585671	0.688485	0.854203	0.678961	2.16239	1.62836	1.00951	1.3617
[S].vEGNPALNR.[V]	Q13409-2	DYNC1I2	0.781606	0.786037	0.755833	0.926345	1.13865	0.79649	1.42326	1.26678	1.0264	1.0986
[K].sVSTPSEAGSq.[D]	Q13409-2	DYNC1I2	0.802783	0.773588	0.707522	0.936068	1.15186	0.734318	1.58025	1.2781	0.894106	1.1414
[E].eNkIPDADkANEk.[K]	Q92598-4	HSPH1	1.15849	0.591911	0.767437	1.11158	1.00324	0.900383	1.4825	1.03145	0.914695	1.03832
[K].vVNVELPIEAN.[L]	Q92598-4	HSPH1	1.01189	0.666187	0.578017	1.08635	0.951911	0.918261	1.45581	0.991482	1.27765	1.06244
[R].vVDFIDEGVNIGLEVk.[S]	P34897-1	SHMT2	0.806231	0.749073	0.66617	0.838806	1.02349	0.67707	1.39159	1.33745	1.18446	1.32566
[A].qTqTGEANR.[G]	P34897-1	SHMT2	0.448191	0.792971	0.667237	0.954795	1.20801	0.643775	1.5594	1.45203	1.03654	1.23705
[K].tVIPGmPTVIPPGLTR.[E]	Q15637	SF1	0.731997	0.675844	0.640727	0.946087	1.00901	0.781856	1.59543	1.30305	0.985471	1.33052
[A].gmPPFGmPPAPPPPPPQn.[-]	Q15637	SF1	0.596043	0.551454	0.632285	0.91623	0.932309	0.964797	1.52263	1.35987	1.13267	1.39171
[R].eLTNDGELILTMTADDVVcTR.[V]	P29373	CRABP2	0.469581	0.515297	0.498461	0.638509	0.675436	0.767615	1.95639	1.71425	1.25345	1.51101
[F].gAVEAISDR.[I]	P07858	CTSB	0.660852	0.511118	0.519525	0.809184	0.787426	0.702559	2.12818	1.47152	1.06816	1.34148
[E].sEVVAGIPR.[T]	P07858	CTSB	0.812134	0.701692	0.722277	0.952206	0.955677	0.830483	1.50293	1.31199	1.02202	1.1886
[K].lPASFDAR.[E]	P07858	CTSB	0.405758	0.334899	0.372472	0.474303	0.609275	0.742302	2.45896	1.76162	1.27557	1.56485
[S].eVVAGIPR.[T]	P07858	CTSB	0.618051	0.420774	0.524716	0.733861	0.765135	0.8857	1.86665	1.59059	1.15123	1.44329
[Q].sDENkDDYTIPDEYR.[I]	P43243	MATR3	0.65565	0.572305	0.765059	0.843974	1.01445	0.601467	2.12557	1.35433	0.978378	1.08882
[M].dYEDDRLR.[D]	P43243	MATR3	0.737515	0.588113	0.636898	0.937135	0.991473	0.729979	1.88197	1.27193	0.988194	1.2368
[M].gLSPDAPEDEAGIk.[K]	O95372	LYPLA2	0.56609	0.601525	0.49579	0.769701	0.975354	1.04781	1.42192	1.41528	1.2211	1.48543
[L].eqEEEEEqAGkPGEPSkkEEGR.[A]	Q9BXP5	SRRT	0.778565	0.904309	0.773379	0.972552	1.14842	0.785063	1.33933	1.19296	1.01928	1.08614
[L].eVERPLPMEVEk.[N]	P51858-3	HDGF	0.629475	0.491046	0.542414	0.760248	0.788935	0.748576	1.95103	1.46933	1.18011	1.43884
[K].eAENPEGEEkEAATL.[E]	P51858-3	HDGF	0.680223	0.497673	0.620352	0.790619	0.871882	0.75532	2.06029	1.39735	1.01688	1.30941
[N].sTPSEPGSGR.[G]	P51858-3	HDGF	0.41226	0.374886	0.385529	0.553378	0.77653	0.696884	2.42817	1.67785	1.16869	1.52582
[E].dAEAPGIR.[D]	P51858-3	HDGF	0.899751	0.636142	0.61196	0.983398	0.927432	0.916727	1.49893	1.19745	1.11818	1.21003
[L].tDMSRPVELSDR.[E]	P50991	CCT4	0.816439	0.575395	0.721342	0.870917	0.99563	0.729438	1.71572	1.33149	1.03279	1.21084
[L].kIDDVVNTR.[-]	P50991	CCT4	1.42271	0.675744	0.972721	1.29312	1.28576	0.59902	1.21051	0.871725	0.754027	0.914659
[K].aVADAIR.[T]	P50991	CCT4	0.783299	0.614721	0.690435	0.890603	1.00549	0.63846	1.69171	1.35987	1.0065	1.31892
[A].gGPEEEAEkPVkTk.[T]	Q8WW12	PCNP	0.887163	0.697862	0.747941	1.01831	1.08889	1.17268	0.847648	1.09233	1.21091	1.23627
[M].aNNEGLFSLVAR.[K]	P40261	NNMT	0.334301	0.329026	0.37006	0.480339	0.580094	1.87835	1.6352	1.45601	1.4119	1.52472
[Q].kFSSLPLGR.[E]	P40261	NNMT	0.470484	0.36967	0.432193	0.622374	0.652543	1.94621	1.53089	1.37872	1.29796	1.29895
[T].dASLDEELDR.[V]	Q9UJZ1	STOML2	0.783617	0.594832	0.657998	0.824792	0.97925	0.744836	1.78102	1.34887	0.985355	1.29943
[Y].gALTkAPVPGTPDSLSSGSSR.[D]	Q9UJZ1	STOML2	0.567295	0.658023	0.562401	0.904645	1.08801	0.806671	1.74365	1.40472	0.995206	1.26938
[Y].sHTDIkVPDFSEYR.[R]	P0C7P4	UQCRFS1P1	0.776197	0.791941	0.759243	1.03624	1.27418	0.68269	1.50078	1.2018	0.878676	1.09826
[L].eVLDSTkSSR.[E]	P0C7P4	UQCRFS1P1	0.780899	0.835112	0.778087	0.950274	1.40629	0.764914	1.26982	1.20064	0.940733	1.07323
[R].gVAGALRPLVq.[A]	P0C7P4	UQCRFS1P1	0.619842	0.52908	0.615812	0.820608	0.878867	0.720905	1.92884	1.50533	1.00656	1.37416
[A].gAEEVLAPLR.[L]	P41250	GARS	0.980523	0.721396	0.709812	1.15599	0.969956	0.860044	1.31099	1.20638	0.976627	1.10829
[K].vDDSSGSIGR.[R]	P41250	GARS	0.85894	0.625347	0.79631	1.06849	1.07524	0.8316	1.49531	1.17225	0.948852	1.12766
[E].eVLAPLR.[L]	P41250	GARS	0.906269	0.58892	0.721409	0.997068	1.01845	0.844867	1.54959	1.24021	0.975791	1.15742
[N].vIEPSFGLGR.[I]	P41250	GARS	0.917083	0.702831	0.82647	1.10335	1.10603	0.767043	1.52865	1.10822	0.873509	1.0668
[A].sVPAqAPkR.[T]	P47914	RPL29	0.698822	0.621014	0.751218	0.857553	0.913888	0.680396	1.8778	1.33488	0.989516	1.27491
[A].aPASVPAqAPkR.[T]	P47914	RPL29	0.898575	0.679029	0.758075	1.01735	0.9366	0.815501	1.47168	1.21991	0.95521	1.24808
[S].vPAqAPkR.[T]	P47914	RPL29	0.56019	0.410048	0.475715	0.680727	0.708211	0.691148	2.29456	1.63511	1.10732	1.43697
[M].sIPIVLPVSAEDkTR.[L]	O95340-2	PAPSS2	0.956519	0.838222	0.912722	1.39753	1.32526	0.635736	1.22514	1.0988	0.721636	0.888426
[F].tGIDSDYEkPETPER.[V]	O95340-2	PAPSS2	1.2848	1.0494	1.02499	1.63062	1.55423	0.513884	0.974781	0.714486	0.560678	0.692129
[L].aLPSDLqLDR.[R]	Q9Y446-2	PKP3	0.614357	0.483971	0.466084	0.703568	0.778836	0.830268	1.83793	1.50992	1.1723	1.60277
[R].sLVEASSSGVSVLSLcEk.[G]	Q9UQ80	PA2G4	1.05264	0.941827	0.918325	1.3096	0.973354	0.758135	0.500856	1.13262	1.11865	1.29399
[Q].yNPEPPPPR.[T]	P04632	CAPNS1	1.0159	0.737209	0.753863	1.13273	1.22051	0.682585	1.35115	1.11871	0.845565	1.14179
[E].aNESEEVR.[Q]	P04632	CAPNS1	1.00585	1.00592	0.809877	1.15042	1.12275	0.769809	1.32135	1.03667	0.802113	0.975239
[Y].nPEPPPPR.[T]	P04632	CAPNS1	0.733862	0.510361	0.541261	0.808782	0.800301	0.82672	1.9427	1.46263	1.06795	1.30544
[C].dVVVIPAGVPR.[K]	P40926	MDH2	0.784819	0.915551	0.808827	1.22263	1.0788	0.673076	1.41019	1.13924	0.890178	1.07669
[K].gIEkNLGIGkVS.[S]	P40926	MDH2	0.476801	0.522436	0.548134	0.499401	1.08299	0.661478	2.10112	1.61767	1.14966	1.3403
[K].gEDFVkTLk.[-]	P40926	MDH2	0.467878	0.373634	0.356119	0.560405	0.613396	0.602397	1.93516	1.93242	1.31109	1.8475
[A].sDTFSGIGkk.[F]	Q15847	ADIRF	0.272294	0.280272	0.307542	0.33316	0.426807	1.57604	1.49859	1.84179	1.66142	1.80209
[A].sDTFSGIGk.[K]	Q15847	ADIRF	0.310347	0.191781	0.216196	0.321941	0.364469	1.27234	1.9575	1.8516	1.68212	1.8317
[S].dTFSGIGk.[K]	Q15847	ADIRF	0.694056	0.469583	0.521603	0.797414	0.872969	0.757947	1.76597	1.51422	1.19061	1.41563
[K].aVPEGFVIPR.[G]	P43490	NAMPT	0.962981	0.863896	0.79779	1.04272	1.21905	0.920702	1.19735	1.07679	0.876637	1.04209
[Y].dGHLPIEIk.[A]	P43490	NAMPT	0.898839	0.66509	0.662266	1.01817	1.02536	0.913433	1.47641	1.1571	0.99764	1.18569
[L].ekYDGHLPIEIk.[A]	P43490	NAMPT	0.519803	0.459907	0.434752	0.633841	0.786616	0.71957	1.77131	1.67191	1.25854	1.74376
[A].vPEGFVIPR.[G]	P43490	NAMPT	0.727172	0.524801	0.554377	0.815137	0.906036	0.898316	1.53685	1.39368	1.19456	1.44907
[Q].sLPPGLAVkELk.[-]	P63173	RPL38	0.979994	0.710039	0.717181	1.21621	1.16977	0.888094	1.19478	1.10326	0.877615	1.14305
[T].lVITDkEkAEk.[L]	P63173	RPL38	1.07539	1.12386	1.75274	1.49218	2.42686	0.289666	0.736161	0.422119	0.317687	0.363328
[Q].sLPPGLAVk.[E]	P63173	RPL38	1.26713	0.525581	0.742048	1.03137	0.956671	0.719097	1.60044	1.25301	0.893163	1.01149
[L].gHEEqqkR.[L]	Q14257-2	RCN2	1.01304	0.85305	0.697156	1.20326	1.00777	0.562651	1.58883	1.14761	0.833638	1.09299
[Q].qDTIEVPEkDLVDkAR.[Q]	P49736	MCM2	1.06727	1.11131	1.05799	1.49845	1.60921	0.623546	0.770072	0.738914	0.711009	0.81223
[Q].eNGDEAGEGR.[E]	Q00341-1	HDLBP	0.739873	0.644371	0.559374	0.867068	0.841746	0.78376	1.52264	1.43011	1.08972	1.52133
[R].tIIGqkGER.[I]	Q00341-1	HDLBP	0.824796	0.664755	0.740195	0.996517	1.08567	0.66467	1.73469	1.25571	0.891078	1.14192
[Q].vAPkTLPWGPk.[R]	Q00341-1	HDLBP	0.980376	0.812975	0.826153	1.21999	1.2941	0.727153	1.19229	1.0407	0.857588	1.04868
[Q].vFHVPLEER.[K]	Q00341-1	HDLBP	0.829661	0.713341	0.848783	1.16017	1.161	0.659927	1.45423	1.08813	0.910226	1.17453
[T].gTkEGIEkAR.[H]	Q00341-1	HDLBP	0.769497	0.681772	0.797392	0.985786	1.1207	0.78809	1.53567	1.22706	0.968269	1.12577
[K].eVGVYEALkDDSWLk.[G]	P40925-3	MDH1	0.671913	0.554718	0.510536	0.727452	0.999435	0.757042	1.44966	1.40639	1.4556	1.46725
[Q].dYIAVkEkYAk.[Y]	P46782	RPS5	0.742806	0.445474	0.566847	0.804238	0.823001	0.703109	1.91961	1.5263	1.13617	1.33244
[Q].aVDVSPLR.[R]	P46782	RPS5	0.656246	0.73539	0.802422	0.999216	1.02236	0.873049	1.23924	1.28624	1.05754	1.32828
[N].aIInSGPR.[E]	P46782	RPS5	0.625928	0.577317	0.674978	0.810032	0.936128	0.814258	1.79873	1.42623	1.0587	1.27769
[T].aAkEIEVGGGR.[K]	P62081	RPS7	0.747419	0.594269	0.755544	0.895241	0.915387	0.714343	1.74141	1.35735	1.00246	1.27657
[K].iVkPnGEkPDEFESGISq.[A]	P62081	RPS7	0.497159	0.371988	0.419015	0.555778	0.592808	0.653981	2.352	1.7657	1.2036	1.58797
[A].kEIEVGGGR.[K]	P62081	RPS7	0.819842	0.609681	0.72747	0.939496	0.991458	0.66116	1.7825	1.27081	0.998909	1.19868
[L].vFPSEIVGk.[R]	P62081	RPS7	1.1171	0.67144	0.757065	1.10248	1.02079	0.670459	1.7166	1.07175	0.868509	1.00382
[L].eYGAScEDIAR.[V]	P09622	DLD	0.502654	0.523332	0.592428	0.647664	1.06614	0.702393	1.8462	1.58958	1.10684	1.42277
[N].aDTDGMVk.[I]	P09622	DLD	1.02239	0.859113	0.789308	1.08306	1.20526	0.719928	1.35664	1.1304	0.831992	1.00191
[Y].gAScEDIAR.[V]	P09622	DLD	0.640091	0.530005	0.607012	0.793639	0.937942	0.760496	1.81697	1.47651	1.08139	1.35595
[R].eAPGPAGGGGGGSR.[W]	Q9BQ61	TRIR	0.828172	0.931565	0.643453	1.47858	1.14005	0.695482	1.52302	0.915222	0.916907	0.927551
[Q].kTEDEVLTSk.[G]	Q9BQ61	TRIR	1.24772	0.800769	0.947226	1.27213	1.20049	0.677737	1.25712	0.940599	0.761436	0.894778
[R].gDTGGEDTAAPGR.[F]	Q9H773	DCTPP1	1.23184	0.953271	0.935348	1.59922	1.37785	0.69373	0.778405	0.795004	0.757167	0.878172
[Q].aSPPGAAEGHLEkPVPEPqR.[K]	P56181-2	NDUFV3	0.83352	0.656678	0.751956	1.01316	1.03929	0.734125	1.67798	1.33042	0.838967	1.12391
[G].sqkEPSEVPTPkRPR.[G]	P17096-3	HMGA1	0.873525	0.76169	0.807992	1.05553	1.15415	0.560641	1.61107	1.23151	0.861961	1.08193
[K].dLLHPSPEEEkR.[K]	P42677	RPS27	0.77099	0.484867	0.597929	0.868137	0.807492	0.631767	2.20329	1.44031	0.99367	1.20155
[L].lHPSPEEEkR.[K]	P42677	RPS27	0.99168	0.65879	0.810643	1.09386	1.26277	0.647313	1.55515	1.09033	0.860073	1.02939
[M].lGETNPADSkPGTIR.[G]	P15531-2	NME1	0.931152	0.630682	0.691016	0.93156	0.991758	0.727876	1.70864	1.19572	0.986664	1.20493
[A].aPDqDEIqR.[L]	P10619	CTSA	0.987699	0.782792	0.785867	1.29256	1.37194	0.52953	1.44656	1.06465	0.766344	0.97207
[K].vLGNPkSDEMNVk.[V]	P60660	MYL6	0.530223	0.40476	0.424326	0.593132	0.749152	0.759644	2.20078	1.64223	1.22764	1.46812
[L].gNPkSDEMNVk.[V]	P60660	MYL6	0.634999	0.544302	0.558061	0.734043	0.877141	0.866607	1.80797	1.37759	1.17647	1.42281
[L].kVLGNPkSDEmNVk.[V]	P60660	MYL6	0.58484	0.487837	0.589002	0.829172	0.999867	0.899682	1.8183	1.33642	1.10733	1.34754
[L].vHELDEAEYR.[D]	Q06323-2	PSME1	0.449571	0.553285	0.615367	0.861757	1.10493	0.803713	1.61576	1.33521	1.23989	1.42052
[S].gGLqPVPIVFR.[G]	P11177	PDHB	0.523155	0.549527	0.486778	0.811243	0.988329	0.872679	1.50747	1.54427	1.15664	1.5599
[R].sGAPAAESkEIVR.[G]	Q9NRX4	PHPT1	0.650212	0.771849	0.66234	1.0467	1.113	0.91796	1.33046	1.25531	1.07784	1.17434
[F].vVGGEDLDPFGPR.[R]	Q92530	PSMF1	0.619397	0.604556	0.540203	0.884167	0.859335	0.831193	1.72586	1.40881	1.12731	1.39917
[L].iDPSSGLPNR.[L]	Q92530	PSMF1	0.789888	0.637668	0.580694	0.953702	0.855298	0.789549	1.68033	1.41876	1.04867	1.24544
[E].eLESENkIPATqkS.[-]	O75506	HSBP1	1.20046	0.889662	0.873544	1.45916	1.36126	0.573627	1.17788	0.941353	0.68805	0.835008
[A].gVEELESENkIPATqkS.[-]	O75506	HSBP1	1.12028	1.03916	0.98394	1.10947	1.51307	0.688419	1.09082	0.919972	0.692599	0.842256
[F].sDNQLQEGk.[N]	P37802-2	TAGLN2	1.00166	0.444551	0.504433	0.806573	0.698618	1.39312	1.39439	1.21277	1.24699	1.29689
[N].dIDESSPGTEWER.[V]	P09496-1	CLTA	1.22187	0.911165	0.846415	1.44714	1.25202	0.574331	1.17493	0.978144	0.711503	0.882486
[T].eSHHkAk.[G-]	P04908	HIST1H2AB	1.92094	1.39311	1.279	1.92275	2.5188	0.200548	0.274195	0.170646	0.16578	0.154235
[K].fSkEEPVSSGPEEAVGk.[S]	O00567	NOP56	0.578209	0.505494	0.546181	0.80772	0.909978	0.670986	2.23796	1.4717	1.04047	1.23129
[F].gPISEVVVVkDR.[E]	P98179	RBM3	0.920588	0.804987	0.853654	1.12097	1.15571	0.712439	1.36024	1.11418	0.91048	1.04675
[S].eVVVVkDR.[E]	P98179	RBM3	0.820524	0.792091	0.819065	1.00263	0.982227	0.617389	1.75867	1.29088	0.879588	1.03693
[M].gDLPAPVTPqPR.[S]	Q8NFH5	NUP35	0.7459	0.593668	0.668493	0.898912	0.974003	0.736254	1.69502	1.40315	1.03172	1.25287
[L].gTGAPVIESPYGETISPEDAPESISk.[A]	P33240	CSTF2	0.869401	0.698226	1.02012	0.931024	1.2673	0.838935	1.41511	1.09548	0.81297	1.05144
[L].sVTGEVEPR.[G]	P33240	CSTF2	0.789491	0.695371	0.676194	0.925092	1.11905	0.74503	1.61711	1.24541	0.977865	1.20939
[G].aVVPqGSR.[Q]	P33240	CSTF2	0.836944	0.707644	0.848855	1.09169	1.26597	0.758835	1.32763	1.11717	0.910039	1.13523
[T].gETVVVGGGTPSR.[L]	Q9BTZ2	DHRS4	0.790514	0.805329	0.749847	1.1445	1.33255	0.525924	1.5737	1.13375	0.847858	1.09603
[K].aVVPEMEkR.[G]	Q9BTZ2	DHRS4	0.857837	0.670768	0.833765	1.00598	1.24065	0.654941	1.43112	1.22794	0.949348	1.12766
[Y].gqESGGFSGPGENR.[S]	Q01844-5	EWSR1	0.651761	0.621481	0.64726	0.846789	0.903918	0.87216	1.48196	1.3513	1.1622	1.46117
[Q].eSGGFSGPGENR.[S]	Q01844-5	EWSR1	0.378722	0.448291	0.404387	0.581579	0.820644	0.753419	2.02007	1.70375	1.2337	1.65544
[N].nVPAEGENEVNNELANR.[M]	Q9NUQ9	FAM49B	0.804227	0.664903	0.722265	0.99676	1.10923	0.747759	1.52066	1.29786	0.991892	1.14444
[Q].mEPkVVTDTDETELAR.[Q]	P05198	EIF2S1	0.73491	0.661397	0.666539	0.886236	1.20589	0.831935	1.58425	1.29167	1.02027	1.1169
[N].sEPEEVIPSR.[L]	P54577	YARS	0.456718	0.420729	0.432745	0.595316	0.73001	0.711611	2.56857	1.65932	1.11085	1.31413
[L].yVEkIDVGEAEPR.[T]	P54577	YARS	0.612336	0.567878	0.540177	0.758104	0.872574	0.964536	1.72734	1.49635	1.21988	1.24082
[K].gPAkNSEPEEVIPSR.[L]	P54577	YARS	0.690689	0.548433	0.634401	0.865262	0.850597	0.704139	1.89247	1.43411	1.07534	1.30456
[L].wAPELAPLkSk.[M]	P60981-1	DSTN	0.913774	0.797303	0.82502	0.893771	1.35649	0.874901	1.26334	1.1569	0.954716	0.963788
[V].qVADEVcR.[I]	P60981-1	DSTN	0.703949	0.579305	0.686225	0.856936	1.04229	0.799901	1.61745	1.37439	1.10407	1.23549
[Y].dASFETk.[E]	P60981-1	DSTN	0.804804	0.63949	0.992667	0.98725	1.57235	0.702593	1.4422	1.03924	0.840478	0.978922
[Q].gLnGEAGPEDSTR.[E]	O15355	PPM1G	1.10927	0.891405	0.863957	1.42845	1.28344	0.707737	0.996989	0.917008	0.805469	0.996277
[R].aGGPTTPLSPTR.[L]	P20700	LMNB1	0.936159	0.708751	0.873785	1.07919	1.35613	0.504497	1.64003	1.11387	0.789714	0.997876
[L].yETELADAR.[R]	P20700	LMNB1	0.728687	0.512367	0.537832	0.758048	0.795982	0.698529	2.01312	1.5938	1.02204	1.3396
[A].gGPTTPLSPTR.[L]	P20700	LMNB1	1.02231	0.789203	0.913237	1.19511	1.28385	0.701557	1.37744	1.03897	0.758318	0.920011
[Q].rEDDkPETVIkR.[L]	Q9UIJ7-1	AK3	0.497953	0.3929	0.38459	0.596494	0.808685	0.709835	2.00209	1.79111	1.28773	1.52862
[Q].rEDDkPETVIk.[R]	Q9UIJ7-1	AK3	1.04129	0.597084	0.82421	1.01327	1.16905	0.806916	1.32892	1.18321	0.954515	1.08153
[L].sHEDLEPPPEHIPPPPRPPkR.[I]	P18031	PTPN1	0.813252	0.805047	0.786327	0.925781	1.16682	0.660443	1.6196	1.23481	0.904021	1.0839
[K].aGPkADGEEDEVkAA.[R]	Q15020	SART3	1.01876	0.979842	0.938186	1.08428	1.21054	0.843656	1.08923	1.02006	0.908371	0.907072
[Q].vIEqETPVSAk.[S]	Q8N6H7	ARFGAP2	0.888902	0.750967	0.749812	1.03108	1.10786	0.752742	1.46648	1.21583	0.933604	1.10271
[N].gIIEEkDIHEELPkR.[K]	Q9BVP2	GNL3	0.618674	0.489267	0.571878	0.805961	0.828024	0.628713	2.12693	1.52842	1.06239	1.33974
[G].aVAEDGDELR.[T]	P27695	APEX1	1.18929	0.735414	0.921071	1.09643	1.2199	0.599669	1.44834	1.12582	0.747383	0.916694
[K].kGAVAEDGDELR.[T]	P27695	APEX1	0.626555	0.595698	0.591978	0.821497	0.934254	0.63946	2.08681	1.5349	1.01214	1.1567
[K].sEAPSGESR.[K]	B5ME19	EIF3CL	1.3175	0.683506	0.658839	1.13096	0.946042	0.727863	1.42105	1.15022	0.893374	1.07064
[L].sEDEEDTkR.[V]	B5ME19	EIF3CL	1.09153	0.821382	0.839368	1.10613	1.18047	0.737595	1.3195	1.09747	0.856565	0.949983
[K].aLPASETPkAA.[E]	O76021	RSL1D1	0.617302	0.509881	0.567509	0.742101	0.928076	0.544037	2.39723	1.48388	0.984377	1.2256
[R].kALPASETPkAA.[E]	O76021	RSL1D1	0.666069	0.535721	0.563578	0.816326	0.85761	0.702825	2.01251	1.44818	1.05602	1.34116
[K].sPNPSTPR.[G]	O76021	RSL1D1	0.369059	0.403504	0.395196	0.48051	0.658983	0.423548	3.23944	1.80594	0.913758	1.31005
[R].dSEqVAELk.[Q]	O60763-2	USO1	0.445842	0.382371	0.402847	0.530423	0.680413	0.768173	2.11594	1.80698	1.28272	1.58429
[N].gIqPEEIGR.[L]	O60763-2	USO1	0.762867	0.602312	0.615024	0.961472	0.975285	0.701813	1.58917	1.41331	1.05895	1.31979
[R].eEIEELkR.[N]	O60763-2	USO1	0.784289	0.568617	0.64342	0.948026	0.843936	0.878411	1.58004	1.35129	1.08097	1.32101
[R].gILSGTSDLLLTFDEAEVR.[K]	P18206	VCL	0.668122	0.710843	0.670515	0.817692	0.889479	0.768193	1.396	1.31634	1.21982	1.54299
[K].aIPDLTAPVAAVq.[A]	P18206	VCL	0.612948	0.509975	0.545492	0.718646	0.903216	0.812265	1.67533	1.3968	1.37148	1.45384
[M].pEPVkSAPVPk.[K]	Q99879	HIST1H2BM	0.521894	0.31434	0.379845	0.507738	0.607798	0.532871	3.16405	1.6956	1.0808	1.19506
[A].dTANEALEAAkR.[L]	Q96I99-2	SUCLG2	0.638848	0.722682	0.630603	0.804225	1.07474	0.790571	1.60032	1.41424	1.03669	1.28708
[N].fDDNAEFR.[Q]	Q96I99-2	SUCLG2	0.706205	0.578361	0.63998	0.857375	1.04341	0.755814	1.72151	1.40582	1.00961	1.28193
[A].sTPVAEqIER.[A]	Q16643-3	DBN1	0.850143	0.859662	0.796986	1.14627	1.25519	0.591983	1.52584	1.13318	0.825536	1.0152
[N].wVGEDVPDAR.[K]	Q16643-3	DBN1	0.864742	0.584484	0.621511	0.923485	0.890303	0.847618	1.68385	1.34593	0.984543	1.25354
[A].iAPPTSLVEkDkELPR.[D]	Q96I25	RBM17	0.423433	0.549773	0.66004	0.758863	1.14166	0.604827	2.1736	1.46568	1.02557	1.19656
[N].nVPLPNTLPLPkR.[E]	Q9Y520-7	PRRC2C	0.682282	0.691843	0.761376	0.953004	1.03655	0.961508	1.35794	1.16574	1.15562	1.23413
[S].gIDIkPGTPPIAGR.[S]	Q9Y520-7	PRRC2C	0.9722	0.531022	0.667652	0.946541	0.945476	0.930957	1.49015	1.26795	1.00347	1.24458
[N].nVTLPAGEQR.[K]	P42166	TMPO	0.603774	0.635568	0.64413	0.935461	0.992562	0.749578	1.81312	1.33202	1.0375	1.25629
[K].fHPDTDDVPVPAPAGDqkEVDTS.[E]	Q02818	NUCB1	1.00833	0.739753	0.754541	0.943185	1.00875	0.843297	1.50419	1.20255	0.974716	1.02068
[S].aITFPEEqEDPR.[I]	Q96M27-2	PRRC1	0.83895	0.629595	0.641793	0.972088	1.02044	0.765942	1.54497	1.31214	0.985444	1.28864
[W].gFIkGVAGNPmVk.[S]	Q96M27-2	PRRC1	0.863872	0.627632	0.623995	1.13615	0.96919	0.804026	1.50519	1.19908	1.02023	1.25064
[N].sDLFPAPPqIPSRPVR.[I]	P50570-1	DNM2	0.927963	0.622858	0.816684	1.01556	1.07888	0.720125	1.50836	1.20264	0.944022	1.16291
[T].aIPPPPPLPGSAR.[I]	O60610-1	DIAPH1	0.684871	0.593755	0.782707	0.926291	1.14129	0.699072	1.54636	1.32188	1.01547	1.2883
[A].aITVPPSVPSR.[A]	O60610-1	DIAPH1	0.720233	0.614397	0.649597	0.899614	0.939224	0.782719	1.64487	1.38241	1.03912	1.32783
[L].aTVEETVVR.[D]	P30154-2	PPP2R1B	0.835386	0.892098	0.816289	1.02717	1.32442	0.731075	1.21097	1.15732	0.911132	1.09414
[L].aSDEqDSVR.[L]	P30154-2	PPP2R1B	1.08017	0.90042	0.93044	1.22538	1.38454	0.727483	1.05474	0.939424	0.78636	0.971043
[YH].fVPLVkR.[L]	P30154-2	PPP2R1B	0.929395	0.680998	0.868887	0.915661	1.34302	0.74333	1.02661	1.23623	1.02055	1.23531
[L].vEFTDEEGYGR.[Y]	Q12874	SF3A3	1.11492	0.83628	0.80248	1.25042	1.11438	0.728553	1.18165	1.01255	0.910627	1.04815
[E].fEELLkAR.[E]	Q12874	SF3A3	0.966635	0.982912	0.994795	1.45857	1.63263	0.651634	0.94679	0.839868	0.707635	0.818534
[L].sIEEIEVAPPkAHEVR.[I]	P11766	ADH5	0.793919	0.701464	0.693231	1.0041	1.09632	0.676853	1.61347	1.25277	1.01775	1.15012
[E].sVGEGVTk.[L]	P11766	ADH5	0.999208	0.564862	0.633806	1.02013	0.876738	0.72984	1.67412	1.2544	1.01586	1.23103
[R].lTTDFNVIVEALSk.[S]	P05455	SSB	0.728363	0.774652	0.609983	0.860788	1.09394	0.861976	1.25453	1.416	1.12337	1.2764
[K].lEEDAEMk.[S]	P05455	SSB	1.03272	0.661938	0.725275	1.06712	0.963619	0.835	1.48553	1.16645	0.938585	1.12376
[R].vqPNEAVYTk.[M]	P11413-2	G6PD	1.64305	0.806569	0.9921	1.54627	1.21143	0.488625	1.10485	0.817313	0.618102	0.771684
[F].fNPEESELDLTYGNR.[Y]	P11413-2	G6PD	0.684404	0.628173	0.659987	0.871129	1.02338	0.796869	1.71096	1.29811	1.03901	1.28797
[Y].gSGGGSGGYGSR.[R]	P51991-1	HNRNPA3	1.14427	1.20766	1.30608	1.74638	1.5863	0.522149	0.696379	0.610871	0.518358	0.66155
[R].nSPVTkTPPR.[D]	Q13541	EIF4EBP1	0.451878	0.404064	0.391094	0.579628	0.610476	0.924344	2.10403	1.6706	1.3658	1.49808
[L].tETGTDLEAVAk.[F]	Q7L1Q6-3	BZW1	0.741493	0.538364	0.780494	0.834796	1.21726	0.716328	1.64623	1.31183	1.00922	1.204
[L].aIIDPGDSDIIR.[S]	P62888	RPL30	0.808393	0.641668	0.610344	0.842898	0.829839	0.887439	1.65968	1.46176	0.989585	1.2684
[G].wETEERPR.[T]	Q13162	PRDX4	0.654509	0.612854	0.689756	0.839987	1.04086	0.743233	1.76205	1.37778	1.03903	1.23993
[S].gNDDDLTIPR.[A]	Q01658	DR1	0.676018	0.512904	0.581279	0.794914	0.862237	0.789706	1.85959	1.42884	1.118	1.37652
[L].gIPEEELLR.[Q]	Q01658	DR1	0.623063	0.665517	0.662859	0.804648	0.952566	0.957041	1.59839	1.36491	1.05871	1.31229
[L].aDLqNDEVAFR.[K]	P61247	RPS3A	0.841596	0.677176	0.679969	1.03472	0.994883	0.659595	1.56283	1.31978	0.963766	1.26569
[A].dLqNDEVAFR.[K]	P61247	RPS3A	0.775054	0.624825	0.689467	0.994865	0.839078	0.729768	1.72499	1.36556	0.999723	1.25667
[R].aDGYEPPVqE.[S]	P61247	RPS3A	0.645775	0.497694	0.545573	0.799593	0.842772	0.761244	1.90222	1.49608	1.0938	1.41525
[E].vLPSDSEAPDLkqEER.[L]	Q14C86-6	GAPVD1	0.785152	0.704879	0.681367	0.962813	1.259	0.574648	1.69496	1.26791	0.89753	1.17175
[Q].aVPNSGPIIIR.[T]	P08047	SP1	0.693086	0.594357	0.622949	0.905385	0.991345	0.727388	1.74063	1.40239	1.05636	1.26611
[W].iEqEGVTVk.[S]	P13928	ANXA8	0.382396	0.310362	0.325135	0.486274	0.502075	1.21995	1.86525	1.72979	1.46769	1.71107
[I].eqEGVTVk.[S]	P13928	ANXA8	0.558819	0.400499	0.496482	0.6898	0.732329	0.802026	1.83474	1.64038	1.29538	1.54955
[K].tLDGGLNVIQLETAVGAAIk.[S]	Q16851	UGP2	0.749324	0.712307	0.540655	0.856971	0.778643	0.815265	1.41495	1.3916	1.21464	1.52564
[M].gVkPGEDASGPAEDLVR.[R]	Q6WKZ4-4	RAB11FIP1	0.936531	0.817011	0.883876	1.1617	1.33857	0.679853	1.36435	1.06587	0.776261	0.975977
[R].vSGGLEVLAEk.[C]	P39687	ANP32A	1.05219	0.714588	0.74145	0.933455	0.944835	0.813919	1.40846	1.22365	0.966217	1.20123
[A].aqPPASHGPER.[S]	O95817	BAG3	0.945531	0.73005	0.809194	1.07685	1.13911	0.639559	1.61791	1.18167	0.771578	1.08855
[A].aAqPPASHGPER.[S]	O95817	BAG3	0.899587	0.594899	0.713293	0.956787	0.961148	0.694582	1.77088	1.23998	0.990678	1.17817
[A].gSGDkPLSDPAPF.[-]	O43399-7	TPD52L2	0.958086	0.612616	0.667824	0.889606	1.10379	0.813544	1.35265	1.22968	1.07674	1.29547
[L].tEAEEEELR.[A]	O43399-7	TPD52L2	0.905794	0.624189	0.627547	0.951072	0.908174	0.750971	1.87001	1.28547	0.969511	1.10727
[K].lkDDEVAQLk.[K]	P07195	LDHB	0.590941	0.487685	0.574387	0.725968	0.784488	0.903199	1.64782	1.52854	1.25979	1.49719
[D].vLEDkLk.[G]	P07195	LDHB	0.449008	0.343086	0.418842	0.538022	0.645719	0.80354	2.12801	1.74567	1.36989	1.55821
[A].yEVIkLk.[G]	P07195	LDHB	0.679517	0.377103	0.439613	0.614797	0.569211	1.66429	1.22661	1.44592	1.4384	1.54454
[A].kAPIqWEER.[N]	P50213-1	IDH3A	0.748515	0.523509	0.577652	0.809108	0.877125	0.98734	1.48934	1.35666	1.2275	1.40325
[S].dFTEEIcR.[R]	P50213-1	IDH3A	0.990185	0.9279	0.839665	1.34014	1.11948	0.722783	1.15562	1.11471	0.80967	0.979852
[K].lITEGASk.[R]	P50213-1	IDH3A	0.879	0.564088	0.604209	0.933119	0.964838	0.726253	1.66824	1.33458	1.06429	1.26139
[F].dAAkAPIqWEER.[N]	P50213-1	IDH3A	0.661847	0.48171	0.463224	0.669561	0.787052	0.981587	1.67194	1.56787	1.23691	1.47829
[Q].gPGPINIGAGGPPqGPR.[Q]	Q9H0L4	CSTF2T	0.750943	0.614226	0.783345	0.962848	1.02902	0.815151	1.48743	1.23675	1.04119	1.2791
[M].kAADEVAEGk.[L]	P07954	FH	0.862126	0.77027	0.741825	1.11621	0.989082	1.03709	1.26957	1.08165	0.998619	1.13356
[A].aDEVAEGk.[L]	P07954	FH	0.81227	0.506629	0.499173	0.840771	0.76022	1.07951	1.50638	1.36905	1.21342	1.41258
[A].gVPMPqAPAGLAGPVR.[G]	P14678-3	SNRPB	0.710021	0.509552	0.572061	0.79728	0.898318	0.796862	1.76712	1.43098	1.10816	1.40965
[A].tSDLEHYDkTR.[H]	P80303	NUCB2	0.737954	0.507095	0.653813	0.836859	0.947728	0.546402	2.46573	1.40786	0.90266	0.993904
[A].dIEEIkSGR.[L]	P80303	NUCB2	1.04258	0.732473	0.74374	1.16856	1.09869	0.628453	1.55569	1.17561	0.847873	1.00633
[Y].emmkEHER.[R]	P80303	NUCB2	0.707009	0.603589	0.681612	0.927827	1.0916	0.711335	1.67316	1.32492	1.13029	1.14865
[L].enGVDIVVGTPGR.[L]	Q92499	DDX1	0.733297	0.786552	0.715792	0.965003	1.07834	0.626789	1.75217	1.31592	0.86979	1.15635
[H].vVVPVNPkTDR.[L]	Q92499	DDX1	0.535843	0.409377	0.519876	0.668006	0.757583	1.03233	1.70678	1.48926	1.37193	1.50901
[T].lTSEEEAR.[L]	P00338-3	LDHA	0.223977	0.201275	0.218028	0.278039	0.507267	0.945447	2.22841	2.03418	1.5209	1.84248
[L].gqnGISDLVk.[V]	P00338-3	LDHA	0.519668	0.497677	0.53757	0.720287	0.910558	0.767472	1.83395	1.53902	1.19892	1.47487
[N].gISDLVk.[V]	P00338-3	LDHA	0.539695	0.561178	0.595617	0.806252	0.839755	0.943318	1.70839	1.48791	1.10918	1.4087
[D].vIEDkLk.[G]	P00338-3	LDHA	0.449008	0.343086	0.418842	0.538022	0.645719	0.80354	2.12801	1.74567	1.36989	1.55821
[N].sDTEGGQPGR.[K]	Q9UKV3-1	ACIN1	0.60414	0.630201	0.645089	0.770994	1.07872	0.527095	2.24677	1.37599	0.900241	1.22076
[Q].kDLEPESDR.[S]	Q9UKV3-1	ACIN1	0.743252	0.717105	0.706721	0.886101	1.1191	0.715389	1.61528	1.35736	1.00394	1.13575
[truncated: 1,655 more rows]
